# Supplementary material for: Genome-Wide Investigation and Analysis of Microsatellites and Compound Microsatellites in Leptolyngbya-like Species, Cyanobacteria
Source: Life (Basel). 2021 Nov 18;11(11):1258. doi: 10.3390/life11111258 (PMC8619395; doi:10.3390/life11111258)
Supplement: Supplementary file 1 [file life-11-01258-s001.zip › Suppl Tables.xlsx]

## Sheet: Table S1
Table S1 Information of 53 Leptolyngbya genomes retrieved from NCBI
Species	Acession No.	Assembly level	Genome size (Mb)	GC%	Scaffolds	Completeness (%)
Leptolyngbya sp. FACHB-402	GCA_014697245	Contig	7.1382	46.98	81	99.41
Leptolyngbya boryana dg5	GCA_002142495	Complete	6.17636	46.99	4	99.41
Leptolyngbya sp. FACHB-239	GCA_014697265	Contig	7.14734	46.98	76	99.41
Leptolyngbya sp. FACHB-238	GCA_014697285	Contig	7.17315	46.98	87	99.41
Leptolyngbya boryana IAM M-101	GCA_002142475	Complete	6.17636	46.99	4	99.41
Leptolyngbya sp. FACHB-161	GCA_014697225	Contig	6.74391	46.97	72	99.41
Leptolyngbya boryana PCC 6306	GCA_000353285	Scaffold	7.26245	47.02	5	99.41
Leptolyngbya boryana NIES-2135	GCA_002368255	Complete	6.25546	47.02	4	99.41
Leptolyngbya sp. UWPOB_LEPTO1	GCA_017302695	Contig	6.80037	46.86	61	99.41
Leptolyngbya sp. FACHB-1624	GCA_014695405	Contig	6.64804	46.89	99	99.41
Leptolyngbya sp. FACHB-17	GCA_014696055	Contig	5.57412	48.17	85	99.53
Leptolyngbya sp. NIES-2104	GCA_001485215	Contig	6.38631	47.43	5	99.29
Leptolyngbya sp. NIES-3755	GCA_001548435	Complete	6.24481	46.65	4	99.41
Leptolyngbya sp. FACHB-321	GCA_014695975	Contig	6.715	49.97	91	99.29
Leptolyngbya sp. isolate ULC077bin1	GCA_003249025	Scaffold	5.46288	48.17	407	97.64
Leptolyngbya sp. 'hensonii'	GCA_001939115	Contig	5.94003	52.32	77	97.64
Leptolyngbya sp. FACHB-8	GCA_014695575	Contig	6.92745	50.67	96	97.64
Leptolyngbya sp. FACHB-16	GCA_014696095	Contig	8.00677	50.32	233	99.06
Leptolyngbya ohadii IS1	GCA_002215035	Scaffold	7.90246	52.09	8	99.17
Leptolyngbya sp. JSC-1	GCA_000733415	Scaffold	7.86682	50.72	2	99.53
Leptolyngbya sp. IPPAS B-1204	GCA_003724315	Contig	8.17468	50.83	187	99.76
Leptolyngbya sp. DLM2.Bin15	GCA_007694125	Contig	5.0061	53.93	384	97.63
Leptolyngbya sp. CCY15150	GCA_016888135	Contig	5.75618	53.4	304	99.17
Leptolyngbya cf. ectocarpi LEGE 11479	GCA_015207065	Contig	6.77449	49.35	656	98.1
Leptolyngbya sp. Heron Island J	GCA_000482245	Contig	8.06417	48.05	119	98.64
Leptolyngbya sp. SIO4C1	GCA_010671975	Contig	5.29975	54.81	848	94.02
Leptolyngbya sp. BC1307	GCA_002286735	Contig	4.91658	52.93	222	98.91
Leptolyngbya foveolarum ULC129bin1	GCA_003242035	Scaffold	4.75098	51.01	299	98.64
Leptolyngbya sp. SIO1E4	GCA_010672825	Scaffold	8.79222	51.44	658	95.74
Leptolyngbya sp. SIO1D8	GCA_010672895	Contig	7.75731	47.92	1786	94.78
Leptolyngbya sp. SIOISBB	GCA_010671905	Scaffold	8.33704	51.86	2	98.82
Leptolyngbya sp. RL_3_1	GCA_012032425	Contig	3.9432	56.13	368	79.94
Leptolyngbya sp. LCM1.Bin17	GCA_007692715	Contig	4.61809	55.39	260	98.55
Leptolyngbya sp. BL0902	GCA_016403105	Complete	4.71021	57.65	6	98.64
Leptolyngbya sp. KIOST-1	GCA_000763385	Contig	6.32012	59.44	13	99.18
Leptolyngbya sp. isolate ULC186bin1	GCA_003249105	Scaffold	5.081	57.41	412	93.18
Leptolyngbya sp. FACHB-60	GCA_014695775	Contig	5.91338	55.56	84	99.7
Leptolyngbya sp. DLM2.Bin27	GCA_007694115	Contig	4.27775	59.01	322	90.31
Leptolyngbya sp. isolate ULC073bin1	GCA_003249155	Scaffold	4.60871	57.79	476	92.03
Leptolyngbya antarctica ULC041bin1	GCA_003241845	Scaffold	4.71199	58.22	287	96.2
Leptolyngbya sp. 7M	GCA_018128485	Scaffold	6.99085	49.92	1	87.75
Leptolyngbya sp. AVDCRST_MAG94	GCA_902805745	Contig	5.5104	52.11	2502	63.81
Leptolyngbya sp. ES-bin-22	GCA_014380065	Contig	5.12949	51.62	603	91.39
Leptolyngbya sp. FACHB-711	GCA_014695615	Contig	6.34584	50.7	598	96.58
Leptolyngbya sp. SIO3F4	GCA_010672145	Scaffold	8.11163	45.71	1508	97.64
Leptolyngbya sp. SIO4C5	GCA_010671965	Contig	5.60444	53.04	1203	95.49
Leptolyngbya sp. 15MV	GCA_018128505	Scaffold	5.08951	66.85	1	81.03
Leptolyngbya sp. CYN1	GCA_014338235	Contig	2.36721	69.02	13	73.23
Leptolyngbya sp. FACHB-36	GCA_014695955	Contig	4.26178	53.3	693	75.47
Leptolyngbya sp. FACHB-541	GCA_014695875	Contig	7.57843	48.64	156	99.76
Leptolyngbya sp. FACHB-671	GCA_014695745	Contig	7.36023	48.66	172	99.76
Leptolyngbya valderiana BDU 20041	GCA_001637395	Contig	6.99135	59.77	420	87.93

## Sheet: Table S2
Table S2 Distance matrix of concatenated sequences of 15 genes from 40 Leptolyngbya genomes
Seq->	FACHB-402	dg5	FACHB-239	FACHB-238	IAM M-101	FACHB-161	PCC 6306	NIES-2135	LEPTO1	FACHB-1624	FACHB-17	NIES-2104	NIES-3755	FACHB-321	ULC077bin1	hensonii'	FACHB-8	FACHB-16	IS1	JSC-1	IPPAS B-1204	DLM2.Bin15	CCY15150	LEGE 11479	Island J	SIO4C1	BC1307	ULC129bin1	SIO1E4	SIO1D8	SIOISBB	RL_3_1	LCM1.Bin17	BL0902	KIOST-1	ULC186bin1	FACHB-60	DLM2.Bin27	ULC073bin1	ULC041bin1
Leptolyngbya sp. FACHB-402	ID	0.984	1	1	0.962	1	0.948	0.962	0.975	0.987	0.831	0.84	0.84	0.707	0.706	0.687	0.712	0.712	0.702	0.71	0.707	0.696	0.697	0.679	0.677	0.659	0.665	0.658	0.684	0.672	0.684	0.658	0.685	0.672	0.679	0.682	0.692	0.659	0.683	0.684
Leptolyngbya boryana dg5	0.984	ID	0.984	0.984	0.977	0.984	0.962	0.976	0.988	0.972	0.837	0.852	0.852	0.71	0.717	0.697	0.707	0.707	0.712	0.719	0.716	0.705	0.706	0.688	0.686	0.666	0.675	0.666	0.692	0.681	0.692	0.662	0.693	0.68	0.687	0.69	0.69	0.665	0.691	0.692
Leptolyngbya sp. FACHB-239	1	0.984	ID	1	0.962	1	0.948	0.962	0.975	0.987	0.831	0.84	0.84	0.707	0.706	0.687	0.712	0.712	0.702	0.71	0.707	0.696	0.697	0.679	0.677	0.659	0.665	0.658	0.684	0.672	0.684	0.658	0.685	0.672	0.679	0.682	0.692	0.659	0.683	0.684
Leptolyngbya sp. FACHB-238	1	0.984	1	ID	0.962	1	0.948	0.962	0.975	0.987	0.831	0.84	0.84	0.707	0.706	0.687	0.712	0.712	0.702	0.71	0.707	0.696	0.697	0.679	0.677	0.659	0.665	0.658	0.684	0.672	0.684	0.658	0.685	0.672	0.679	0.682	0.692	0.659	0.683	0.684
Leptolyngbya boryana IAM M-101	0.962	0.977	0.962	0.962	ID	0.962	0.94	0.954	0.966	0.95	0.819	0.834	0.834	0.696	0.701	0.682	0.691	0.691	0.707	0.704	0.701	0.69	0.691	0.673	0.671	0.653	0.669	0.652	0.677	0.666	0.677	0.648	0.678	0.665	0.671	0.675	0.675	0.655	0.679	0.679
Leptolyngbya sp. FACHB-161	1	0.984	1	1	0.962	ID	0.948	0.962	0.975	0.987	0.831	0.84	0.84	0.707	0.706	0.687	0.712	0.712	0.702	0.71	0.707	0.696	0.697	0.679	0.677	0.659	0.665	0.658	0.684	0.672	0.684	0.658	0.685	0.672	0.679	0.682	0.692	0.659	0.683	0.684
Leptolyngbya boryana PCC 6306	0.948	0.962	0.948	0.948	0.94	0.948	ID	0.94	0.952	0.937	0.806	0.82	0.82	0.688	0.693	0.68	0.685	0.685	0.692	0.698	0.695	0.683	0.683	0.67	0.667	0.646	0.654	0.646	0.673	0.662	0.673	0.644	0.673	0.667	0.669	0.672	0.671	0.646	0.671	0.672
Leptolyngbya boryana NIES-2135	0.962	0.976	0.962	0.962	0.954	0.962	0.94	ID	0.967	0.95	0.82	0.835	0.835	0.701	0.704	0.686	0.695	0.695	0.7	0.709	0.705	0.693	0.694	0.677	0.675	0.656	0.665	0.657	0.68	0.669	0.681	0.651	0.682	0.673	0.677	0.681	0.682	0.656	0.682	0.682
Leptolyngbya sp. UWPOB_LEPTO1	0.975	0.988	0.975	0.975	0.966	0.975	0.952	0.967	ID	0.974	0.838	0.853	0.851	0.711	0.717	0.697	0.708	0.708	0.714	0.72	0.716	0.707	0.707	0.69	0.686	0.667	0.675	0.667	0.693	0.681	0.694	0.663	0.694	0.681	0.689	0.692	0.692	0.665	0.691	0.692
Leptolyngbya sp. FACHB-1624	0.987	0.972	0.987	0.987	0.95	0.987	0.937	0.95	0.974	ID	0.831	0.837	0.838	0.705	0.707	0.687	0.712	0.712	0.703	0.711	0.707	0.697	0.697	0.68	0.678	0.66	0.667	0.659	0.684	0.672	0.686	0.659	0.685	0.673	0.678	0.683	0.692	0.66	0.684	0.685
Leptolyngbya sp. FACHB-17	0.831	0.837	0.831	0.831	0.819	0.831	0.806	0.82	0.838	0.831	ID	0.877	0.886	0.703	0.707	0.694	0.705	0.705	0.714	0.72	0.717	0.702	0.702	0.688	0.687	0.664	0.67	0.663	0.69	0.677	0.686	0.667	0.69	0.68	0.689	0.693	0.686	0.666	0.697	0.697
Leptolyngbya sp. NIES-2104	0.84	0.852	0.84	0.84	0.834	0.84	0.82	0.835	0.853	0.837	0.877	ID	0.918	0.707	0.715	0.696	0.701	0.701	0.713	0.716	0.713	0.701	0.702	0.689	0.684	0.666	0.673	0.666	0.691	0.677	0.692	0.662	0.687	0.68	0.688	0.69	0.687	0.666	0.695	0.695
Leptolyngbya sp. NIES-3755	0.84	0.852	0.84	0.84	0.834	0.84	0.82	0.835	0.851	0.838	0.886	0.918	ID	0.712	0.718	0.699	0.705	0.705	0.711	0.722	0.718	0.705	0.706	0.691	0.687	0.668	0.673	0.664	0.691	0.679	0.692	0.658	0.69	0.679	0.686	0.689	0.687	0.661	0.69	0.69
Leptolyngbya sp. FACHB-321	0.707	0.71	0.707	0.707	0.696	0.707	0.688	0.701	0.711	0.705	0.703	0.707	0.712	ID	0.732	0.717	0.715	0.714	0.702	0.718	0.711	0.71	0.709	0.695	0.697	0.673	0.676	0.658	0.698	0.681	0.702	0.672	0.698	0.675	0.699	0.701	0.7	0.669	0.699	0.699
Leptolyngbya sp. isolate ULC077bin1	0.706	0.717	0.706	0.706	0.701	0.706	0.693	0.704	0.717	0.707	0.707	0.715	0.718	0.732	ID	0.715	0.701	0.701	0.702	0.723	0.719	0.713	0.711	0.695	0.695	0.667	0.671	0.66	0.696	0.683	0.693	0.671	0.694	0.672	0.685	0.689	0.689	0.662	0.688	0.688
Leptolyngbya sp. 'hensonii'	0.687	0.697	0.687	0.687	0.682	0.687	0.68	0.686	0.697	0.687	0.694	0.696	0.699	0.717	0.715	ID	0.711	0.711	0.702	0.728	0.724	0.716	0.715	0.698	0.694	0.68	0.678	0.664	0.701	0.688	0.697	0.679	0.706	0.686	0.701	0.699	0.692	0.666	0.695	0.695
Leptolyngbya sp. FACHB-8	0.712	0.707	0.712	0.712	0.691	0.712	0.685	0.695	0.708	0.712	0.705	0.701	0.705	0.715	0.701	0.711	ID	0.999	0.726	0.737	0.732	0.72	0.72	0.7	0.704	0.678	0.678	0.665	0.698	0.678	0.698	0.675	0.705	0.705	0.72	0.718	0.722	0.694	0.72	0.72
Leptolyngbya sp. FACHB-16	0.712	0.707	0.712	0.712	0.691	0.712	0.685	0.695	0.708	0.712	0.705	0.701	0.705	0.714	0.701	0.711	0.999	ID	0.726	0.737	0.732	0.72	0.72	0.7	0.704	0.678	0.678	0.665	0.698	0.678	0.698	0.675	0.705	0.705	0.72	0.718	0.722	0.694	0.72	0.72
Leptolyngbya ohadii IS1	0.702	0.712	0.702	0.702	0.707	0.702	0.692	0.7	0.714	0.703	0.714	0.713	0.711	0.702	0.702	0.702	0.726	0.726	ID	0.754	0.749	0.72	0.723	0.69	0.686	0.686	0.689	0.667	0.69	0.671	0.689	0.664	0.696	0.693	0.709	0.705	0.702	0.687	0.706	0.706
Leptolyngbya sp. JSC-1	0.71	0.719	0.71	0.71	0.704	0.71	0.698	0.709	0.72	0.711	0.72	0.716	0.722	0.718	0.723	0.728	0.737	0.737	0.754	ID	0.97	0.729	0.729	0.707	0.704	0.704	0.691	0.682	0.71	0.687	0.711	0.689	0.722	0.713	0.733	0.727	0.719	0.7	0.73	0.73
Leptolyngbya sp. IPPAS B-1204	0.707	0.716	0.707	0.707	0.701	0.707	0.695	0.705	0.716	0.707	0.717	0.713	0.718	0.711	0.719	0.724	0.732	0.732	0.749	0.97	ID	0.726	0.727	0.708	0.706	0.699	0.689	0.678	0.709	0.684	0.707	0.688	0.72	0.71	0.728	0.723	0.714	0.695	0.723	0.723
Leptolyngbya sp. DLM2.Bin15	0.696	0.705	0.696	0.696	0.69	0.696	0.683	0.693	0.707	0.697	0.702	0.701	0.705	0.71	0.713	0.716	0.72	0.72	0.72	0.729	0.726	ID	0.943	0.712	0.704	0.704	0.693	0.678	0.715	0.701	0.711	0.695	0.721	0.714	0.73	0.732	0.725	0.705	0.728	0.728
Leptolyngbya sp. CCY15150	0.697	0.706	0.697	0.697	0.691	0.697	0.683	0.694	0.707	0.697	0.702	0.702	0.706	0.709	0.711	0.715	0.72	0.72	0.723	0.729	0.727	0.943	ID	0.707	0.702	0.708	0.693	0.679	0.716	0.701	0.712	0.691	0.721	0.714	0.727	0.727	0.723	0.703	0.728	0.727
Leptolyngbya cf. ectocarpi LEGE 11479	0.679	0.688	0.679	0.679	0.673	0.679	0.67	0.677	0.69	0.68	0.688	0.689	0.691	0.695	0.695	0.698	0.7	0.7	0.69	0.707	0.708	0.712	0.707	ID	0.84	0.722	0.709	0.689	0.715	0.7	0.721	0.689	0.712	0.7	0.717	0.721	0.713	0.692	0.718	0.718
Leptolyngbya sp. Heron Island J	0.677	0.686	0.677	0.677	0.671	0.677	0.667	0.675	0.686	0.678	0.687	0.684	0.687	0.697	0.695	0.694	0.704	0.704	0.686	0.704	0.706	0.704	0.702	0.84	ID	0.717	0.704	0.688	0.717	0.699	0.723	0.689	0.71	0.687	0.71	0.718	0.706	0.681	0.707	0.708
Leptolyngbya sp. SIO4C1	0.659	0.666	0.659	0.659	0.653	0.659	0.646	0.656	0.667	0.66	0.664	0.666	0.668	0.673	0.667	0.68	0.678	0.678	0.686	0.704	0.699	0.704	0.708	0.722	0.717	ID	0.702	0.678	0.705	0.684	0.705	0.666	0.698	0.686	0.716	0.709	0.707	0.684	0.704	0.704
Leptolyngbya sp. BC1307	0.665	0.675	0.665	0.665	0.669	0.665	0.654	0.665	0.675	0.667	0.67	0.673	0.673	0.676	0.671	0.678	0.678	0.678	0.689	0.691	0.689	0.693	0.693	0.709	0.704	0.702	ID	0.758	0.699	0.678	0.702	0.677	0.695	0.684	0.708	0.707	0.698	0.691	0.709	0.709
Leptolyngbya foveolarum ULC129bin1	0.658	0.666	0.658	0.658	0.652	0.658	0.646	0.657	0.667	0.659	0.663	0.666	0.664	0.658	0.66	0.664	0.665	0.665	0.667	0.682	0.678	0.678	0.679	0.689	0.688	0.678	0.758	ID	0.682	0.664	0.683	0.654	0.682	0.669	0.692	0.686	0.681	0.662	0.689	0.689
Leptolyngbya sp. SIO1E4	0.684	0.692	0.684	0.684	0.677	0.684	0.673	0.68	0.693	0.684	0.69	0.691	0.691	0.698	0.696	0.701	0.698	0.698	0.69	0.71	0.709	0.715	0.716	0.715	0.717	0.705	0.699	0.682	ID	0.801	0.768	0.717	0.736	0.706	0.73	0.728	0.722	0.7	0.728	0.727
Leptolyngbya sp. SIO1D8	0.672	0.681	0.672	0.672	0.666	0.672	0.662	0.669	0.681	0.672	0.677	0.677	0.679	0.681	0.683	0.688	0.678	0.678	0.671	0.687	0.684	0.701	0.701	0.7	0.699	0.684	0.678	0.664	0.801	ID	0.738	0.692	0.716	0.686	0.707	0.711	0.704	0.675	0.705	0.704
Leptolyngbya sp. SIOISBB	0.684	0.692	0.684	0.684	0.677	0.684	0.673	0.681	0.694	0.686	0.686	0.692	0.692	0.702	0.693	0.697	0.698	0.698	0.689	0.711	0.707	0.711	0.712	0.721	0.723	0.705	0.702	0.683	0.768	0.738	ID	0.715	0.732	0.715	0.735	0.739	0.729	0.708	0.734	0.734
Leptolyngbya sp. RL_3_1	0.658	0.662	0.658	0.658	0.648	0.658	0.644	0.651	0.663	0.659	0.667	0.662	0.658	0.672	0.671	0.679	0.675	0.675	0.664	0.689	0.688	0.695	0.691	0.689	0.689	0.666	0.677	0.654	0.717	0.692	0.715	ID	0.71	0.689	0.714	0.713	0.704	0.681	0.709	0.709
Leptolyngbya sp. LCM1.Bin17	0.685	0.693	0.685	0.685	0.678	0.685	0.673	0.682	0.694	0.685	0.69	0.687	0.69	0.698	0.694	0.706	0.705	0.705	0.696	0.722	0.72	0.721	0.721	0.712	0.71	0.698	0.695	0.682	0.736	0.716	0.732	0.71	ID	0.769	0.802	0.79	0.786	0.751	0.787	0.787
Leptolyngbya sp. BL0902	0.672	0.68	0.672	0.672	0.665	0.672	0.667	0.673	0.681	0.673	0.68	0.68	0.679	0.675	0.672	0.686	0.705	0.705	0.693	0.713	0.71	0.714	0.714	0.7	0.687	0.686	0.684	0.669	0.706	0.686	0.715	0.689	0.769	ID	0.791	0.789	0.775	0.757	0.781	0.782
Leptolyngbya sp. KIOST-1	0.679	0.687	0.679	0.679	0.671	0.679	0.669	0.677	0.689	0.678	0.689	0.688	0.686	0.699	0.685	0.701	0.72	0.72	0.709	0.733	0.728	0.73	0.727	0.717	0.71	0.716	0.708	0.692	0.73	0.707	0.735	0.714	0.802	0.791	ID	0.849	0.841	0.809	0.837	0.837
Leptolyngbya sp. isolate ULC186bin1	0.682	0.69	0.682	0.682	0.675	0.682	0.672	0.681	0.692	0.683	0.693	0.69	0.689	0.701	0.689	0.699	0.718	0.718	0.705	0.727	0.723	0.732	0.727	0.721	0.718	0.709	0.707	0.686	0.728	0.711	0.739	0.713	0.79	0.789	0.849	ID	0.904	0.812	0.849	0.849
Leptolyngbya sp. FACHB-60	0.692	0.69	0.692	0.692	0.675	0.692	0.671	0.682	0.692	0.692	0.686	0.687	0.687	0.7	0.689	0.692	0.722	0.722	0.702	0.719	0.714	0.725	0.723	0.713	0.706	0.707	0.698	0.681	0.722	0.704	0.729	0.704	0.786	0.775	0.841	0.904	ID	0.804	0.836	0.835
Leptolyngbya sp. DLM2.Bin27	0.659	0.665	0.659	0.659	0.655	0.659	0.646	0.656	0.665	0.66	0.666	0.666	0.661	0.669	0.662	0.666	0.694	0.694	0.687	0.7	0.695	0.705	0.703	0.692	0.681	0.684	0.691	0.662	0.7	0.675	0.708	0.681	0.751	0.757	0.809	0.812	0.804	ID	0.818	0.817
Leptolyngbya sp. isolate ULC073bin1	0.683	0.691	0.683	0.683	0.679	0.683	0.671	0.682	0.691	0.684	0.697	0.695	0.69	0.699	0.688	0.695	0.72	0.72	0.706	0.73	0.723	0.728	0.728	0.718	0.707	0.704	0.709	0.689	0.728	0.705	0.734	0.709	0.787	0.781	0.837	0.849	0.836	0.818	ID	0.994
Leptolyngbya antarctica ULC041bin1	0.684	0.692	0.684	0.684	0.679	0.684	0.672	0.682	0.692	0.685	0.697	0.695	0.69	0.699	0.688	0.695	0.72	0.72	0.706	0.73	0.723	0.728	0.727	0.718	0.708	0.704	0.709	0.689	0.727	0.704	0.734	0.709	0.787	0.782	0.837	0.849	0.835	0.817	0.994	ID

## Sheet: Table S3
Table S3 Summary of ANI (Average Nucleotide Identity) between Leptolyngbya-like genomes studied. Blank cells indicated that the values were below 70%, which were not shown by the calculator. Strains were colored by the groups identified in Figure 1.
Group	Strains	FACHB-402	dg5	FACHB-239	FACHB-238	IAM M-101	FACHB-161	PCC 6306	NIES-2135	UWPOB_LEPTO1	FACHB-1624	FACHB-17	NIES-2104	NIES-3755	FACHB-321	ULC077bin1	'hensonii'	FACHB-8	FACHB-16	IS1	JSC-1	IPPAS B-1204	DLM2.Bin15	CCY15150	ectocarpi LEGE 11479	Heron Island J	SIO4C1	BC1307	ULC129bin1	SIO1E4	SIO1D8	SIOISBB	RL_3_1	LCM1.Bin17	BL0902	KIOST-1	ULC186bin1	FACHB-60	DLM2.Bin27	ULC073bin1	ULC041bin1	7M	AVDCRST_MAG94	ES-bin-22	FACHB-711	SIO3F4	SIO4C5
Leptolyngbya sensu stricto	Leptolyngbya sp. FACHB-402	100
	Leptolyngbya boryana dg5	99.9977	100
	Leptolyngbya sp. FACHB-239	99.9992	100	100
	Leptolyngbya sp. FACHB-238	100	100	100	100
	Leptolyngbya boryana IAM M-101	100	100	100	100	100
	Leptolyngbya sp. FACHB-161	100	100	100	100	100	100
	Leptolyngbya boryana PCC 6306	100	100	100	100	100	100	100
	Leptolyngbya boryana NIES-2135	100	100	100	100	100	100	100	100
	Leptolyngbya sp. UWPOB_LEPTO1	98.2683	98.3528	98.2696	98.2602	98.3526	98.3487	98.2788	98.3489	100
	Leptolyngbya sp. FACHB-1624	98.1907	98.2077	98.1897	98.1933	98.2077	98.1727	98.1722	98.2026	98.1774	100
Clade A	Leptolyngbya sp. FACHB-17	78.3358	78.2562	78.3551	78.3778	78.2602	78.3281	78.4304	78.4628	78.4213	78.2912	100
	Leptolyngbya sp. NIES-2104	78.1403	77.7175	78.1015	78.1183	77.7188	78.0013	78.243	77.7775	77.9367	77.6157	79.5678	100
	Leptolyngbya sp. NIES-3755	77.8176	78.0077	77.9368	77.8962	78.0074	77.8919	78.0835	77.9615	78.1772	77.7792	80	83.1075	100
	Leptolyngbya sp. FACHB-321	76.5917	76.8565	76.5338	76.8668	76.8561	76.5843	76.7487	77.2507	75.6576	77.2979	79.1302	76.2355	77.7521	100
	Leptolyngbya sp. ULC077bin1	74.3623	74.4972	74.5405	74.6382	74.4975	74.6183	74.553	74.6633	73.7535	74.3414	76.6491	72.3888	73.6207	76.9022	100
	Leptolyngbya sp. 'hensonii'	76.568	77.0641	76.5046	76.2979	77.0652	76.4744	77.3251	77.1565	74.9131	76.3836	74.1031	78.0651	77.9971	75.1795	73.8173	100
Clade B	Leptolyngbya sp. FACHB-8	76.8104	76.7046	76.7612	76.8795	76.705	76.6653	77.4815	76.8896	73.4209	74.2577	76.0824	78.277	77.0106	76.3537	73.7417	74.5199	100
	Leptolyngbya sp. FACHB-16	78.0245	77.996	77.7702	77.8831	77.996	77.5279	77.7886	77.9578	76.921	76.073	75.882	79.1026	78.2177	77.9744	74.8574	74.9445	99.9794	100
	Leptolyngbya ohadii IS1	76.6251	77.5729	76.6949	76.4564	77.5934	76.6015	77.0315	76.9783	75.3817	76.8193	75.2974	77.0752	77.5359	76.1456	73.2276	75.2689	76.2475	76.6159	100
Clade C	Leptolyngbya sp. JSC-1	74.6458	75.0482	74.5817	74.4826	75.0507	74.3677	74.8384	75.0499	74.269	74.5692	73.9837	73.5009	74.7396	74.266	72.7297	74.1904	74.2498	74.4152	76.1234	100
	Leptolyngbya sp. IPPAS B-1204	75.8676	76.0193	75.7257	75.8316	76.0215	75.7637	76.1397	76.4185	74.3979	76.0682	74.9915	74.8361	75.6499	76.7082	73.7597	74.7948	75.4081	76.5074	76.7484	96.6431	100
Clade D	Leptolyngbya sp. DLM2.Bin15	73.6316	73.7197	73.6352	73.5987	73.7212	73.9831	73.6974	74.3316	74.2558	73.3965	73.7072	74.53	75.4332	74.8812	74.1792	73.409	73.9635	75.0848	74.6318	73.5907	73.6184	100
	Leptolyngbya sp. CCY15150	75.661	76.6655	75.6965	75.6366	76.6663	75.8806	76.862	77.3817	75.3278	76.8131	74.1729	76.9545	78.0127	77.6228	73.9126	75.6646	75.0769	76.0948	75.5326	73.9037	74.1405	89.9166	100
Clade E	Leptolyngbya cf. ectocarpi LEGE 11479														76.3382		75.4912	72.5371	72.6622	75.0641	73.0998	74.5016	73.0062	74.3143	100
	Leptolyngbya sp. Heron Island J															73.5058	72.8274	73.6108	73.7545		72.44	73.0377	71.7688	73.8197	80	100
	Leptolyngbya sp. SIO4C1														74.8829			74.2718	74.0027	74.6531	73.4522	74.3536	72.8382	74.8868	75.3006	74.901	100
	Leptolyngbya sp. BC1307														75.9729	72.8924		74.8497	74.0425	75.707	72.2355	74.621	72.9998	75.2401	74.5621	72.8225	74.5095	100
	Leptolyngbya foveolarum ULC129bin1																	73.3774		73.0756		72.8384	73.3848	73.8396	74.1235	72.3522	73.0725	78.3644	100
Clade F	Leptolyngbya sp. SIO1E4	71.9305	72.0026		71.9176	72.0162										72.3797	73.6454	72.8374	73.0064	72.921	73.0192	73.2245	72.9092	73.2323	76.3611	78.0033	75.1021	72.9852	72.2463	100
	Leptolyngbya sp. SIO1D8				75.8735	77.2304																		72.9302	75.5934	77.3408				80	100
	Leptolyngbya sp. SIOISBB	75.8568	77.2535	75.8269				76.9482	76.5735		76.0854	73.8444		76.1691	74.6784	72.7955	76.128	74.3561	74.1269	73.7336	72.0818	73.8142	73.3464	75.1178	78.4536	80.6368	76.7996	75.1057	72.4064	79.6832	80	100
	Leptolyngbya sp. RL_3_1															71.9086	72.4286		72.5933	73.3288	72.1393	72.9825	73.5651	73.2269	73.8592	74.8266	73.9276	73.4465	72.0288	74.4965	74.5722	75.1542	100
	Leptolyngbya sp. LCM1.Bin17															72.0533	72.8935	73.1621	73.2147	71.8034	72.2764	72.4304	74.7572	75.5928	72.8088	72.7556	72.9568	72.6594	71.005	74.3812	72.9745	73.3576	74.5122	100
Clade G	Leptolyngbya sp. BL0902													78.0679	76.6121	73.5999	75.5551	75.005	74.9277	75.0787	74.707	75.1692	75.1058	75.2841	75.0806	74.0742	75.3583	74.8059	73.876	74.387	74.8508	75.4159	75.3833	77.454	100
	Leptolyngbya sp. KIOST-1												76.9331		76.9618	73.9344	76.2777	74.2567	74.2284	75.4785	74.005	75.4037	76.1576	78.7785	75.4027	74.8552	75.0887	75.429	73.2974	74.8621	74.1859	75.4493	75.5485	78.5213	80	100
	Leptolyngbya sp. ULC186bin1														76.8259	73.2181	75.0416	74.5832	74.079	74.7782	73.8562	74.5491	76.0623	77.318	75.0761	73.8853	74.9647	74.9545	75.0706	73.8312	73.5845	74.3194	75.3261	77.369	80	82.265	100
	Leptolyngbya sp. FACHB-60							76.6476	76.5787			77.2253	78.7585		88.4016	74.0149	75.0559	75.9912	77.2066	76.1597	74.0158	74.7289	75.3553	79.0356	74.0405	73.3761	74.6039	75.4284	73.2685	73.9035	72.489	74.9706	74.8414	77.5287	80	81.1839	86.6049	100
	Leptolyngbya sp. DLM2.Bin27														73.3094	71.0036	72.4333	73.2193	73.0459	73.5173	73.5333	73.3078	74.7902	76.7092	73.2146	72.9143	73.9965	75.0667	73.2001	73.8145	73.3282	73.389	74.9898	78.0711	80	81.4964	81.5937	80.9375	100
	Leptolyngbya sp. ULC073bin1														75.6707	73.5496	72.9165	73.9182	73.8486	74.0418	73.6506	73.9148	75.856	76.5103	73.3266	73.1826	74.3588	78.6122	73.4784	74.0575	74.0577	74.0312	75.4623	78.0069	80	82.0641	82.844	81.9737	84.5553	100
	Leptolyngbya antarctica ULC041bin1											81.8592			75.7871	77.2079	75.6777	73.7844	73.6263	74.3016	73.3746	74.6202	75.4891	76.4604	74.1483	73.2282	74.3798	79.5807	73.8057	74.0533	73.4517	74.3467	75.3072	77.9542	80	82.0488	82.7488	81.9532	84.5685	98.5122	100
	Leptolyngbya sp. 7M												77.4276				80.0089	76.4436	76.3254	77.1498	93.9627	93.6189													78.0118	76.4696	75.9248				77.591	100
	Leptolyngbya sp. AVDCRST_MAG94	77.7295	77.6281	77.4459	77.6563	77.6213	77.0718	78.2677	77.5123	77.6516	77.6046	78.1863	80.2211	76.3303	91.4563	76.4276	74.5808	78.2919	80.388	75.3804	74.6398	75.4684	75.4522	78.1546											75.1074	75.6938	75.2596	82.1378					100
	Leptolyngbya sp. ES-bin-22	74.6896	74.89	74.6541	74.7592	74.8898	75.0052	74.6878	74.438	74.7976	74.6451	73.6211	72.7161	72.8267	79.3719	76.2738	73.9075	74.1712	76.8436	73.3611	73.4109	73.507	73.3025	73.0986			72.0521					72.6638		72.249	73.0314	72.2027	72.3568	73.5667	72.0397	72.4504	75.8305		79.3627	100
	Leptolyngbya sp. FACHB-711	76.1809	75.4087	76.0759	76.0736	75.4083	75.8044	76.1289	75.5336	74.1186	75.4545	80.0576	75.5124	75.801	79.5777	73.2022	76.4713	77.4197	78.938	80.7698	75.805	75.8524	75.041	75.7248	75.5747		72.9941	75.605	73.4583	72.9036		75.1474			75.535	74.2123	74.9578	79.3977	72.931	73.6902	74.9897	77.3516	77.7287	73.3376	100
	Leptolyngbya sp. SIO3F4																								77.5643	77.7846	73.6304			76.5322	75.497	75.7679				73.3472										100
	Leptolyngbya sp. SIO4C5		76.0841			76.0802		76.2562			76.8019		75.923		75.427	72.8572	75.9621	73.7431	73.2423	75.6239	74.0695	75.3947	73.9678	74.7089	75.2807	73.4014	75.7338	75.0885	74.1157	74.0089	73.7865	75.194	73.3445	73.7065	75.3623	74.8272	74.6421	75.1762	73.7271	74.6155	74.6261		74.9886		74.8461	73.0677	100

## Sheet: Table S4
Table S4 Detailed information on CSSRs identified in 46 Leptolyngbya genomes
Species	Id of CSSR	Start position	End postion	Motif	Complexity	Length	Gap	Structure	Location
Leptolyngbya sp. FACHB-402	1	37	55	A-GGA	2	15	4	(A)6-(GGA)3	noncoding
Leptolyngbya sp. FACHB-402	2	16079	16099	TG-GC	2	12	9	(TG)3-(GC)3	coding
Leptolyngbya sp. FACHB-402	3	32929	32951	GA-GC	2	16	7	(GA)5-(GC)3	coding
Leptolyngbya sp. FACHB-402	4	34631	34646	GA-A	2	13	3	(GA)3-(A)7	coding
Leptolyngbya sp. FACHB-402	5	44530	44542	TC-AG	2	12	1	(TC)3-(AG)3	coding
Leptolyngbya sp. FACHB-402	6	46180	46197	A-TTAA	2	18	0	(A)6-(TTAA)3	noncoding
Leptolyngbya sp. FACHB-402	7	50634	50654	A-A	2	13	8	(A)6-(A)7	noncoding
Leptolyngbya sp. FACHB-402	8	56951	56967	GC-T	2	13	4	(GC)3-(T)7	coding
Leptolyngbya sp. FACHB-402	9	58548	58566	TC-T	2	12	7	(TC)3-(T)6	noncoding
Leptolyngbya sp. FACHB-402	10	65672	65690	A-A	2	12	7	(A)6-(A)6	noncoding
Leptolyngbya sp. FACHB-402	11	74356	74377	A-GC	2	12	10	(A)6-(GC)3	coding
Leptolyngbya sp. FACHB-402	12	83722	83741	A-GA	2	12	8	(A)6-(GA)3	noncoding
Leptolyngbya sp. FACHB-402	13	86707	86722	T-GA	2	13	3	(T)7-(GA)3	coding
Leptolyngbya sp. FACHB-402	14	92321	92334	A-TC	2	12	2	(A)6-(TC)3	noncoding
Leptolyngbya sp. FACHB-402	15	125210	125224	TC-ATC	2	15	0	(TC)3-(ATC)3	coding
Leptolyngbya sp. FACHB-402	16	151001	151019	AC-T	2	12	7	(AC)3-(T)6	noncoding
Leptolyngbya sp. FACHB-402	17	177692	177709	A-GTC	2	15	3	(A)6-(GTC)3	coding
Leptolyngbya sp. FACHB-402	18	180395	180413	AG-TC	2	12	7	(AG)3-(TC)3	noncoding
Leptolyngbya sp. FACHB-402	19	213002	213014	CA-AG	2	12	1	(CA)3-(AG)3	coding
Leptolyngbya sp. FACHB-402	20	213795	213806	A-GT	2	12	0	(A)6-(GT)3	coding
Leptolyngbya sp. FACHB-402	21	223766	223793	CTT-TTC	2	24	4	(CTT)4-(TTC)4	coding
Leptolyngbya sp. FACHB-402	22	226916	226935	TG-TC	2	12	8	(TG)3-(TC)3	coding
Leptolyngbya sp. FACHB-402	23	236490	236508	TTGC-TG	2	18	1	(TTGC)3-(TG)3	coding
Leptolyngbya sp. FACHB-402	24	242878	242898	TC-CAA	2	15	6	(TC)3-(CAA)3	coding
Leptolyngbya sp. FACHB-402	25	244346	244363	TC-GCA	2	15	3	(TC)3-(GCA)3	coding
Leptolyngbya sp. FACHB-402	26	267465	267482	T-AG	2	12	6	(T)6-(AG)3	noncoding
Leptolyngbya sp. FACHB-402	27	278007	278027	A-AG	2	12	9	(A)6-(AG)3	coding
Leptolyngbya sp. FACHB-402	28	283475	283497	CA-A-CT	3	20	3	(CA)3-(A)6-(CT)4	coding
Leptolyngbya sp. FACHB-402	29	284141	284157	AG-AG	2	12	5	(AG)3-(AG)3	coding
Leptolyngbya sp. FACHB-402	30	293667	293687	GC-CAC	2	15	6	(GC)3-(CAC)3	coding
Leptolyngbya sp. FACHB-402	31	302143	302162	A-A	2	12	8	(A)6-(A)6	noncoding
Leptolyngbya sp. FACHB-402	32	315106	315129	T-TCC	2	16	8	(T)7-(TCC)3	coding
Leptolyngbya sp. FACHB-402	33	334458	334474	T-A	2	13	4	(T)6-(A)7	noncoding
Leptolyngbya sp. FACHB-402	34	380780	380793	AG-TC	2	14	0	(AG)3-(TC)4	noncoding
Leptolyngbya sp. FACHB-402	35	381672	381693	CT-T	2	12	10	(CT)3-(T)6	coding
Leptolyngbya sp. FACHB-402	36	388854	388869	T-GT	2	12	4	(T)6-(GT)3	coding
Leptolyngbya sp. FACHB-402	37	400515	400530	CA-A	2	12	4	(CA)3-(A)6	coding
Leptolyngbya sp. FACHB-402	38	436381	436396	AG-TC	2	12	4	(AG)3-(TC)3	coding
Leptolyngbya sp. FACHB-402	39	460843	460854	CT-TG	2	12	0	(CT)3-(TG)3	noncoding
Leptolyngbya sp. FACHB-402	40	466226	466247	AGC-AG	2	15	7	(AGC)3-(AG)3	coding
Leptolyngbya sp. FACHB-402	41	469999	470013	CT-AG	2	12	3	(CT)3-(AG)3	coding
Leptolyngbya sp. FACHB-402	42	477569	477590	AG-CA	2	12	10	(AG)3-(CA)3	noncoding
Leptolyngbya sp. FACHB-402	43	491414	491429	AG-TC	2	12	4	(AG)3-(TC)3	coding
Leptolyngbya sp. FACHB-402	44	500329	500344	T-AG	2	12	4	(T)6-(AG)3	coding
Leptolyngbya sp. FACHB-402	45	507349	507363	A-GA	2	14	1	(A)8-(GA)3	noncoding
Leptolyngbya sp. FACHB-402	46	512599	512612	T-T	2	12	2	(T)6-(T)6	noncoding
Leptolyngbya sp. FACHB-402	47	523091	523102	CA-AG	2	12	0	(CA)3-(AG)3	coding
Leptolyngbya sp. FACHB-402	48	529986	530007	CTG-CTG	2	18	4	(CTG)3-(CTG)3	coding
Leptolyngbya sp. FACHB-402	49	530669	530682	GC-T	2	12	2	(GC)3-(T)6	coding
Leptolyngbya sp. FACHB-402	50	545074	545090	A-G	2	12	5	(A)6-(G)6	coding
Leptolyngbya sp. FACHB-402	51	553758	553781	TC-AG-A	3	18	6	(TC)3-(AG)3-(A)6	noncoding
Leptolyngbya sp. FACHB-402	52	555278	555290	TG-TG	2	12	1	(TG)3-(TG)3	coding
Leptolyngbya sp. FACHB-402	53	557816	557846	T-T-A	3	19	12	(T)6-(T)7-(A)6	noncoding
Leptolyngbya sp. FACHB-402	54	561626	561643	GT-GC	2	12	6	(GT)3-(GC)3	coding
Leptolyngbya sp. FACHB-402	55	590566	590586	TC-AG	2	12	9	(TC)3-(AG)3	noncoding
Leptolyngbya sp. FACHB-402	56	595293	595305	TA-T	2	12	1	(TA)3-(T)6	noncoding
Leptolyngbya sp. FACHB-402	57	612757	612780	TC-GCA	2	15	9	(TC)3-(GCA)3	coding
Leptolyngbya sp. FACHB-402	58	671023	671042	TCG-GC	2	15	5	(TCG)3-(GC)3	coding
Leptolyngbya sp. FACHB-402	59	675628	675646	A-A	2	12	7	(A)6-(A)6	noncoding
Leptolyngbya sp. FACHB-402	60	692988	693004	AG-GT	2	12	5	(AG)3-(GT)3	coding
Leptolyngbya sp. FACHB-402	61	695848	695869	A-AT	2	12	10	(A)6-(AT)3	coding
Leptolyngbya sp. FACHB-402	62	702477	702497	A-CT	2	12	9	(A)6-(CT)3	coding
Leptolyngbya sp. FACHB-402	63	704411	704423	T-GA	2	12	1	(T)6-(GA)3	coding
Leptolyngbya sp. FACHB-402	64	718404	718420	A-A	2	12	5	(A)6-(A)6	noncoding
Leptolyngbya sp. FACHB-402	65	16523	16538	T-T	2	13	3	(T)7-(T)6	coding
Leptolyngbya sp. FACHB-402	66	37732	37748	TC-TC	2	12	5	(TC)3-(TC)3	noncoding
Leptolyngbya sp. FACHB-402	67	44138	44154	A-C	2	12	5	(A)6-(C)6	noncoding
Leptolyngbya sp. FACHB-402	68	49380	49398	CTG-T	2	15	4	(CTG)3-(T)6	noncoding
Leptolyngbya sp. FACHB-402	69	61625	61643	A-ATC	2	15	4	(A)6-(ATC)3	coding
Leptolyngbya sp. FACHB-402	70	72985	73001	AG-A	2	15	2	(AG)4-(A)7	coding
Leptolyngbya sp. FACHB-402	71	102816	102827	GC-T	2	12	0	(GC)3-(T)6	coding
Leptolyngbya sp. FACHB-402	72	117980	117998	CT-CG	2	12	7	(CT)3-(CG)3	coding
Leptolyngbya sp. FACHB-402	73	127163	127184	A-GC	2	14	8	(A)6-(GC)4	coding
Leptolyngbya sp. FACHB-402	74	167212	167234	A-T	2	13	10	(A)7-(T)6	noncoding
Leptolyngbya sp. FACHB-402	75	170572	170593	TC-GC	2	12	10	(TC)3-(GC)3	coding
Leptolyngbya sp. FACHB-402	76	176523	176537	T-G	2	12	3	(T)6-(G)6	coding
Leptolyngbya sp. FACHB-402	77	198071	198090	A-GC	2	12	8	(A)6-(GC)3	coding
Leptolyngbya sp. FACHB-402	78	9123	9141	T-T	2	12	7	(T)6-(T)6	noncoding
Leptolyngbya sp. FACHB-402	79	15758	15773	TC-T	2	13	3	(TC)3-(T)7	coding
Leptolyngbya sp. FACHB-402	80	25417	25429	GC-AT	2	12	1	(GC)3-(AT)3	noncoding
Leptolyngbya sp. FACHB-402	81	42134	42163	CG-GA-GA	3	20	10	(CG)3-(GA)3-(GA)4	noncoding
Leptolyngbya sp. FACHB-402	82	46933	46953	G-CG	2	12	9	(G)6-(CG)3	coding
Leptolyngbya sp. FACHB-402	83	58225	58246	C-GT	2	12	10	(C)6-(GT)3	coding
Leptolyngbya sp. FACHB-402	84	66978	66994	T-T	2	13	4	(T)7-(T)6	coding
Leptolyngbya sp. FACHB-402	85	69654	69675	TA-A	2	15	7	(TA)4-(A)7	noncoding
Leptolyngbya sp. FACHB-402	86	77415	77434	CT-CT	2	14	6	(CT)4-(CT)3	noncoding
Leptolyngbya sp. FACHB-402	87	83716	83730	T-T	2	12	3	(T)6-(T)6	noncoding
Leptolyngbya sp. FACHB-402	88	87054	87069	GA-AG	2	12	4	(GA)3-(AG)3	noncoding
Leptolyngbya sp. FACHB-402	89	104731	104745	A-A	2	12	3	(A)6-(A)6	noncoding
Leptolyngbya sp. FACHB-402	90	117138	117152	AG-TC	2	14	1	(AG)4-(TC)3	coding
Leptolyngbya sp. FACHB-402	91	134736	134752	A-GA	2	12	5	(A)6-(GA)3	coding
Leptolyngbya sp. FACHB-402	92	151259	151277	A-T	2	12	7	(A)6-(T)6	coding
Leptolyngbya sp. FACHB-402	93	178967	178985	GA-A	2	12	7	(GA)3-(A)6	coding
Leptolyngbya sp. FACHB-402	94	186956	186975	A-A	2	12	8	(A)6-(A)6	noncoding
Leptolyngbya sp. FACHB-402	95	197138	197149	TC-A	2	12	0	(TC)3-(A)6	noncoding
Leptolyngbya sp. FACHB-402	96	6070	6085	CT-CT	2	12	4	(CT)3-(CT)3	coding
Leptolyngbya sp. FACHB-402	97	13610	13639	A-GA-CT	3	18	12	(A)6-(GA)3-(CT)3	coding
Leptolyngbya sp. FACHB-402	98	17061	17082	CG-AC	2	12	10	(CG)3-(AC)3	coding
Leptolyngbya sp. FACHB-402	99	22788	22806	TCT-CA	2	15	4	(TCT)3-(CA)3	noncoding
Leptolyngbya sp. FACHB-402	100	23323	23337	AT-AT	2	12	3	(AT)3-(AT)3	noncoding
Leptolyngbya sp. FACHB-402	101	23894	23914	GCT-GA	2	15	6	(GCT)3-(GA)3	coding
Leptolyngbya sp. FACHB-402	102	47078	47102	GAA-CT	2	15	10	(GAA)3-(CT)3	coding
Leptolyngbya sp. FACHB-402	103	61836	61847	TG-AC	2	12	0	(TG)3-(AC)3	noncoding
Leptolyngbya sp. FACHB-402	104	67064	67076	GT-A	2	12	1	(GT)3-(A)6	noncoding
Leptolyngbya sp. FACHB-402	105	67319	67344	CA-GCA	2	17	9	(CA)4-(GCA)3	noncoding
Leptolyngbya sp. FACHB-402	106	71674	71701	TA-TA-TA	3	20	8	(TA)3-(TA)4-(TA)3	noncoding
Leptolyngbya sp. FACHB-402	107	73861	73877	GA-TC	2	12	5	(GA)3-(TC)3	coding
Leptolyngbya sp. FACHB-402	108	75880	75900	AG-TC	2	12	9	(AG)3-(TC)3	coding
Leptolyngbya sp. FACHB-402	109	78261	78282	AATG-AC	2	18	4	(AATG)3-(AC)3	noncoding
Leptolyngbya sp. FACHB-402	110	79521	79536	A-CT	2	12	4	(A)6-(CT)3	noncoding
Leptolyngbya sp. FACHB-402	111	79548	79566	CG-T	2	12	7	(CG)3-(T)6	noncoding
Leptolyngbya sp. FACHB-402	112	85295	85310	T-C	2	14	2	(T)6-(C)8	coding
Leptolyngbya sp. FACHB-402	113	93031	93052	TG-TTC	2	15	7	(TG)3-(TTC)3	coding
Leptolyngbya sp. FACHB-402	114	98976	98997	T-AG	2	12	10	(T)6-(AG)3	coding
Leptolyngbya sp. FACHB-402	115	101231	101249	GC-T	2	12	7	(GC)3-(T)6	noncoding
Leptolyngbya sp. FACHB-402	116	134753	134769	AC-CG	2	12	5	(AC)3-(CG)3	noncoding
Leptolyngbya sp. FACHB-402	117	149900	149916	CT-A	2	12	5	(CT)3-(A)6	noncoding
Leptolyngbya sp. FACHB-402	118	150961	150977	T-TC	2	12	5	(T)6-(TC)3	noncoding
Leptolyngbya sp. FACHB-402	119	156656	156669	A-CT	2	12	2	(A)6-(CT)3	noncoding
Leptolyngbya sp. FACHB-402	120	181236	181262	GGC-GAA	2	18	9	(GGC)3-(GAA)3	coding
Leptolyngbya sp. FACHB-402	121	39	53	T-TC	2	12	3	(T)6-(TC)3	noncoding
Leptolyngbya sp. FACHB-402	122	1834	1848	T-A	2	14	1	(T)6-(A)8	noncoding
Leptolyngbya sp. FACHB-402	123	2246	2260	TG-CG	2	12	3	(TG)3-(CG)3	coding
Leptolyngbya sp. FACHB-402	124	17890	17907	GA-T	2	12	6	(GA)3-(T)6	coding
Leptolyngbya sp. FACHB-402	125	30917	30940	CTG-CAA	2	18	6	(CTG)3-(CAA)3	coding
Leptolyngbya sp. FACHB-402	126	50701	50716	GT-A	2	13	3	(GT)3-(A)7	noncoding
Leptolyngbya sp. FACHB-402	127	57508	57525	A-A	2	12	6	(A)6-(A)6	coding
Leptolyngbya sp. FACHB-402	128	61617	61636	A-CG	2	12	8	(A)6-(CG)3	coding
Leptolyngbya sp. FACHB-402	129	79347	79367	A-T	2	12	9	(A)6-(T)6	coding
Leptolyngbya sp. FACHB-402	130	84803	84835	T-C-C	3	18	15	(T)6-(C)6-(C)6	noncoding
Leptolyngbya sp. FACHB-402	131	85808	85826	CG-ATT	2	15	4	(CG)3-(ATT)3	coding
Leptolyngbya sp. FACHB-402	132	89841	89857	C-C	2	12	5	(C)6-(C)6	noncoding
Leptolyngbya sp. FACHB-402	133	90475	90496	GA-T	2	12	10	(GA)3-(T)6	noncoding
Leptolyngbya sp. FACHB-402	134	109970	109982	CT-T	2	12	1	(CT)3-(T)6	noncoding
Leptolyngbya sp. FACHB-402	135	140180	140200	A-AG	2	12	9	(A)6-(AG)3	noncoding
Leptolyngbya sp. FACHB-402	136	144660	144672	GC-AG	2	12	1	(GC)3-(AG)3	coding
Leptolyngbya sp. FACHB-402	137	146274	146295	TG-AG	2	14	8	(TG)3-(AG)4	noncoding
Leptolyngbya sp. FACHB-402	138	165992	166014	TTCC-G	2	18	5	(TTCC)3-(G)6	noncoding
Leptolyngbya sp. FACHB-402	139	179540	179557	TC-A	2	12	6	(TC)3-(A)6	noncoding
Leptolyngbya sp. FACHB-402	140	1770	1786	AG-AG	2	12	5	(AG)3-(AG)3	coding
Leptolyngbya sp. FACHB-402	141	78657	78671	A-A	2	12	3	(A)6-(A)6	coding
Leptolyngbya sp. FACHB-402	142	91223	91242	GT-GA	2	14	6	(GT)3-(GA)4	noncoding
Leptolyngbya sp. FACHB-402	143	91428	91444	TG-AT	2	12	5	(TG)3-(AT)3	coding
Leptolyngbya sp. FACHB-402	144	92525	92548	TC-A-GT	3	18	6	(TC)3-(A)6-(GT)3	noncoding
Leptolyngbya sp. FACHB-402	145	175788	175810	T-AAGT	2	18	5	(T)6-(AAGT)3	noncoding
Leptolyngbya sp. FACHB-402	146	175951	175972	TC-CT	2	12	10	(TC)3-(CT)3	noncoding
Leptolyngbya sp. FACHB-402	147	178090	178103	CG-AT	2	12	2	(CG)3-(AT)3	coding
Leptolyngbya sp. FACHB-402	148	185650	185671	T-GC	2	12	10	(T)6-(GC)3	noncoding
Leptolyngbya sp. FACHB-402	149	647	658	GT-CT	2	12	0	(GT)3-(CT)3	coding
Leptolyngbya sp. FACHB-402	150	1488	1507	A-GC	2	13	7	(A)7-(GC)3	coding
Leptolyngbya sp. FACHB-402	151	4512	4533	CG-GT	2	14	8	(CG)4-(GT)3	coding
Leptolyngbya sp. FACHB-402	152	79742	79764	TGA-A	2	18	5	(TGA)4-(A)6	coding
Leptolyngbya sp. FACHB-402	153	82556	82572	A-CT	2	14	3	(A)8-(CT)3	coding
Leptolyngbya sp. FACHB-402	154	90390	90402	A-CT	2	12	1	(A)6-(CT)3	noncoding
Leptolyngbya sp. FACHB-402	155	107646	107666	A-A	2	13	8	(A)7-(A)6	noncoding
Leptolyngbya sp. FACHB-402	156	109352	109366	T-A	2	12	3	(T)6-(A)6	noncoding
Leptolyngbya sp. FACHB-402	157	147380	147404	T-TGC	2	15	10	(T)6-(TGC)3	coding
Leptolyngbya sp. FACHB-402	158	154964	154975	GA-AG	2	12	0	(GA)3-(AG)3	coding
Leptolyngbya sp. FACHB-402	159	155054	155065	GA-AG	2	12	0	(GA)3-(AG)3	coding
Leptolyngbya sp. FACHB-402	160	155144	155155	GA-AG	2	12	0	(GA)3-(AG)3	coding
Leptolyngbya sp. FACHB-402	161	166230	166247	G-CG	2	12	6	(G)6-(CG)3	coding
Leptolyngbya sp. FACHB-402	162	169664	169675	T-GT	2	12	0	(T)6-(GT)3	noncoding
Leptolyngbya sp. FACHB-402	163	172065	172084	GA-A	2	12	8	(GA)3-(A)6	noncoding
Leptolyngbya sp. FACHB-402	164	178241	178252	T-CT	2	12	0	(T)6-(CT)3	noncoding
Leptolyngbya sp. FACHB-402	165	182342	182356	GA-A	2	12	3	(GA)3-(A)6	noncoding
Leptolyngbya sp. FACHB-402	166	7924	7939	TG-G	2	12	4	(TG)3-(G)6	coding
Leptolyngbya sp. FACHB-402	167	17391	17405	GC-TC	2	12	3	(GC)3-(TC)3	coding
Leptolyngbya sp. FACHB-402	168	28315	28326	CG-A	2	12	0	(CG)3-(A)6	coding
Leptolyngbya sp. FACHB-402	169	30320	30345	TC-GCAAC	2	21	5	(TC)3-(GCAAC)3	coding
Leptolyngbya sp. FACHB-402	170	61531	61544	A-TC	2	12	2	(A)6-(TC)3	coding
Leptolyngbya sp. FACHB-402	171	85263	85284	AAG-AG	2	15	7	(AAG)3-(AG)3	coding
Leptolyngbya sp. FACHB-402	172	85823	85841	TG-T	2	12	7	(TG)3-(T)6	coding
Leptolyngbya sp. FACHB-402	173	88759	88780	CG-A	2	12	10	(CG)3-(A)6	coding
Leptolyngbya sp. FACHB-402	174	89876	89895	A-A	2	12	8	(A)6-(A)6	noncoding
Leptolyngbya sp. FACHB-402	175	95546	95565	GA-T	2	12	8	(GA)3-(T)6	coding
Leptolyngbya sp. FACHB-402	176	104015	104032	T-TC	2	13	5	(T)7-(TC)3	coding
Leptolyngbya sp. FACHB-402	177	126736	126753	TC-GA	2	14	4	(TC)4-(GA)3	noncoding
Leptolyngbya sp. FACHB-402	178	126776	126791	T-T	2	12	4	(T)6-(T)6	noncoding
Leptolyngbya sp. FACHB-402	179	128852	128870	AG-CA	2	12	7	(AG)3-(CA)3	coding
Leptolyngbya sp. FACHB-402	180	137340	137352	CA-GA	2	12	1	(CA)3-(GA)3	coding
Leptolyngbya sp. FACHB-402	181	146995	147016	TC-CT	2	12	10	(TC)3-(CT)3	coding
Leptolyngbya sp. FACHB-402	182	10953	10965	T-GA	2	12	1	(T)6-(GA)3	coding
Leptolyngbya sp. FACHB-402	183	14162	14185	GT-CT	2	14	10	(GT)3-(CT)4	coding
Leptolyngbya sp. FACHB-402	184	15912	15929	GAA-A	2	15	3	(GAA)3-(A)6	coding
Leptolyngbya sp. FACHB-402	185	79900	79926	ATG-ACG	2	18	9	(ATG)3-(ACG)3	coding
Leptolyngbya sp. FACHB-402	186	100259	100277	GTG-CAG	2	18	1	(GTG)3-(CAG)3	coding
Leptolyngbya sp. FACHB-402	187	117126	117149	A-AAG	2	15	9	(A)6-(AAG)3	coding
Leptolyngbya sp. FACHB-402	188	10006	10017	CA-AG	2	12	0	(CA)3-(AG)3	coding
Leptolyngbya sp. FACHB-402	189	10108	10125	T-AG	2	13	5	(T)7-(AG)3	noncoding
Leptolyngbya sp. FACHB-402	190	31655	31669	TTG-GA	2	15	0	(TTG)3-(GA)3	noncoding
Leptolyngbya sp. FACHB-402	191	47925	47946	GT-CT	2	12	10	(GT)3-(CT)3	coding
Leptolyngbya sp. FACHB-402	192	66847	66868	CG-A	2	12	10	(CG)3-(A)6	coding
Leptolyngbya sp. FACHB-402	193	82239	82259	GC-A	2	12	9	(GC)3-(A)6	coding
Leptolyngbya sp. FACHB-402	194	96653	96668	AT-A	2	14	2	(AT)3-(A)8	noncoding
Leptolyngbya sp. FACHB-402	195	103095	103112	AG-GT	2	14	4	(AG)3-(GT)4	coding
Leptolyngbya sp. FACHB-402	196	112777	112802	CTG-GCA	2	18	8	(CTG)3-(GCA)3	coding
Leptolyngbya sp. FACHB-402	197	13911	13943	A-AC-AT	3	20	13	(A)6-(AC)3-(AT)4	noncoding
Leptolyngbya sp. FACHB-402	198	19349	19369	T-CG	2	12	9	(T)6-(CG)3	coding
Leptolyngbya sp. FACHB-402	199	43913	43936	GC-TG	2	14	10	(GC)4-(TG)3	coding
Leptolyngbya sp. FACHB-402	200	83121	83134	A-GC	2	12	2	(A)6-(GC)3	coding
Leptolyngbya sp. FACHB-402	201	97735	97757	GCA-GA	2	17	6	(GCA)3-(GA)4	coding
Leptolyngbya sp. FACHB-402	202	1347	1361	AG-CT	2	12	3	(AG)3-(CT)3	coding
Leptolyngbya sp. FACHB-402	203	3189	3210	A-AC	2	12	10	(A)6-(AC)3	coding
Leptolyngbya sp. FACHB-402	204	61286	61299	A-C	2	12	2	(A)6-(C)6	coding
Leptolyngbya sp. FACHB-402	205	67668	67686	CT-A	2	12	7	(CT)3-(A)6	coding
Leptolyngbya sp. FACHB-402	206	76785	76802	A-GGC	2	16	2	(A)7-(GGC)3	coding
Leptolyngbya sp. FACHB-402	207	96520	96542	GTT-GA	2	15	8	(GTT)3-(GA)3	coding
Leptolyngbya sp. FACHB-402	208	107246	107259	T-AC	2	13	1	(T)7-(AC)3	coding
Leptolyngbya sp. FACHB-402	209	109040	109052	AG-A	2	12	1	(AG)3-(A)6	noncoding
Leptolyngbya sp. FACHB-402	210	126566	126585	A-GT	2	12	8	(A)6-(GT)3	coding
Leptolyngbya sp. FACHB-402	211	172342	172363	AG-GA	2	12	10	(AG)3-(GA)3	noncoding
Leptolyngbya sp. FACHB-402	212	175198	175215	T-TGC	2	16	2	(T)7-(TGC)3	coding
Leptolyngbya sp. FACHB-402	213	186689	186707	T-TC	2	12	7	(T)6-(TC)3	noncoding
Leptolyngbya sp. FACHB-402	214	194838	194859	CT-T	2	12	10	(CT)3-(T)6	coding
Leptolyngbya sp. FACHB-402	215	204189	204201	AG-TC	2	12	1	(AG)3-(TC)3	coding
Leptolyngbya sp. FACHB-402	216	215047	215061	T-A	2	12	3	(T)6-(A)6	coding
Leptolyngbya sp. FACHB-402	217	236022	236038	TG-G	2	12	5	(TG)3-(G)6	coding
Leptolyngbya sp. FACHB-402	218	238379	238399	CG-AC	2	14	7	(CG)4-(AC)3	coding
Leptolyngbya sp. FACHB-402	219	251169	251191	CG-CTG	2	15	8	(CG)3-(CTG)3	coding
Leptolyngbya sp. FACHB-402	220	271964	271979	GC-CT	2	12	4	(GC)3-(CT)3	coding
Leptolyngbya sp. FACHB-402	221	291906	291921	T-A	2	12	4	(T)6-(A)6	noncoding
Leptolyngbya sp. FACHB-402	222	329717	329735	GA-CAT	2	15	4	(GA)3-(CAT)3	coding
Leptolyngbya sp. FACHB-402	223	351482	351503	A-A	2	15	7	(A)6-(A)9	noncoding
Leptolyngbya sp. FACHB-402	224	357593	357608	GA-AT	2	12	4	(GA)3-(AT)3	coding
Leptolyngbya sp. FACHB-402	225	378498	378512	AG-T	2	12	3	(AG)3-(T)6	coding
Leptolyngbya sp. FACHB-402	226	391833	391853	TTG-TTG	2	18	3	(TTG)3-(TTG)3	coding
Leptolyngbya sp. FACHB-402	227	400350	400367	CG-CT	2	12	6	(CG)3-(CT)3	coding
Leptolyngbya sp. FACHB-402	228	403438	403460	GT-CAA	2	15	8	(GT)3-(CAA)3	coding
Leptolyngbya sp. FACHB-402	229	427295	427346	AC-AC-AC-AC-AC	5	40	12	(AC)4-(AC)4-(AC)4-(AC)4-(AC)4	noncoding
Leptolyngbya sp. FACHB-402	230	430517	430535	C-TC	2	12	7	(C)6-(TC)3	coding
Leptolyngbya sp. FACHB-402	231	433959	433980	G-C	2	17	5	(G)8-(C)9	noncoding
Leptolyngbya sp. FACHB-402	232	446052	446068	TC-CT	2	12	5	(TC)3-(CT)3	coding
Leptolyngbya sp. FACHB-402	233	469657	469674	C-G	2	12	6	(C)6-(G)6	noncoding
Leptolyngbya sp. FACHB-402	234	27483	27496	CG-CT	2	12	2	(CG)3-(CT)3	noncoding
Leptolyngbya sp. FACHB-402	235	61242	61256	A-C	2	13	2	(A)7-(C)6	coding
Leptolyngbya sp. FACHB-402	236	64383	64403	CT-A	2	12	9	(CT)3-(A)6	coding
Leptolyngbya sp. FACHB-402	237	66078	66110	TC-CG-AT	3	18	15	(TC)3-(CG)3-(AT)3	coding
Leptolyngbya sp. FACHB-402	238	71291	71309	A-CT	2	12	7	(A)6-(CT)3	noncoding
Leptolyngbya sp. FACHB-402	239	85167	85184	A-AG	2	12	6	(A)6-(AG)3	noncoding
Leptolyngbya sp. FACHB-402	240	94981	94998	A-CG	2	12	6	(A)6-(CG)3	coding
Leptolyngbya sp. FACHB-402	241	102331	102345	CT-TC	2	12	3	(CT)3-(TC)3	coding
Leptolyngbya sp. FACHB-402	242	109069	109081	A-TC	2	12	1	(A)6-(TC)3	coding
Leptolyngbya sp. FACHB-402	243	120883	120903	TC-T	2	12	9	(TC)3-(T)6	noncoding
Leptolyngbya sp. FACHB-402	244	10998	11021	CGA-GA	2	15	9	(CGA)3-(GA)3	coding
Leptolyngbya sp. FACHB-402	245	42329	42347	T-AT	2	13	6	(T)7-(AT)3	noncoding
Leptolyngbya sp. FACHB-402	246	45572	45593	GC-AG	2	12	10	(GC)3-(AG)3	coding
Leptolyngbya sp. FACHB-402	247	52148	52188	T-A-TC-T	4	24	17	(T)6-(A)6-(TC)3-(T)6	noncoding
Leptolyngbya sp. FACHB-402	248	99459	99471	A-TC	2	12	1	(A)6-(TC)3	noncoding
Leptolyngbya sp. FACHB-402	249	100989	101004	A-AC	2	12	4	(A)6-(AC)3	coding
Leptolyngbya sp. FACHB-402	250	108651	108669	A-CT	2	12	7	(A)6-(CT)3	noncoding
Leptolyngbya sp. FACHB-402	251	394	418	A-ATG	2	15	10	(A)6-(ATG)3	noncoding
Leptolyngbya sp. FACHB-402	252	6760	6779	CAA-GA	2	15	5	(CAA)3-(GA)3	coding
Leptolyngbya sp. FACHB-402	253	21993	22012	GT-T	2	13	7	(GT)3-(T)7	noncoding
Leptolyngbya sp. FACHB-402	254	38147	38159	CG-T	2	12	1	(CG)3-(T)6	noncoding
Leptolyngbya sp. FACHB-402	255	46937	46953	A-TG	2	13	4	(A)7-(TG)3	noncoding
Leptolyngbya sp. FACHB-402	256	57909	57928	A-AG	2	12	8	(A)6-(AG)3	noncoding
Leptolyngbya sp. FACHB-402	257	79754	79769	TC-AG	2	14	2	(TC)3-(AG)4	coding
Leptolyngbya sp. FACHB-402	258	87136	87155	A-TG	2	12	8	(A)6-(TG)3	noncoding
Leptolyngbya sp. FACHB-402	259	93312	93327	T-TC	2	12	4	(T)6-(TC)3	coding
Leptolyngbya sp. FACHB-402	260	73652	73665	GA-TC	2	12	2	(GA)3-(TC)3	noncoding
Leptolyngbya sp. FACHB-402	261	88382	88394	T-A	2	12	1	(T)6-(A)6	noncoding
Leptolyngbya sp. FACHB-402	262	26099	26117	AG-GA	2	12	7	(AG)3-(GA)3	coding
Leptolyngbya sp. FACHB-402	263	26774	26792	A-TC	2	12	7	(A)6-(TC)3	coding
Leptolyngbya sp. FACHB-402	264	36300	36313	GC-GA	2	12	2	(GC)3-(GA)3	coding
Leptolyngbya sp. FACHB-402	265	46721	46740	A-TC	2	12	8	(A)6-(TC)3	coding
Leptolyngbya sp. FACHB-402	266	53457	53474	C-C	2	12	6	(C)6-(C)6	coding
Leptolyngbya sp. FACHB-402	267	67473	67494	AC-ACA	2	15	7	(AC)3-(ACA)3	noncoding
Leptolyngbya sp. FACHB-402	268	94621	94639	AGA-A	2	15	4	(AGA)3-(A)6	coding
Leptolyngbya sp. FACHB-402	269	6781	6798	A-CG	2	12	6	(A)6-(CG)3	coding
Leptolyngbya sp. FACHB-402	270	19944	19960	T-A	2	12	5	(T)6-(A)6	coding
Leptolyngbya sp. FACHB-402	271	20568	20584	CT-A	2	12	5	(CT)3-(A)6	coding
Leptolyngbya sp. FACHB-402	272	22344	22357	GA-GC	2	12	2	(GA)3-(GC)3	coding
Leptolyngbya sp. FACHB-402	273	47330	47343	T-C	2	12	2	(T)6-(C)6	coding
Leptolyngbya sp. FACHB-402	274	73052	73071	CTG-TC	2	15	5	(CTG)3-(TC)3	coding
Leptolyngbya sp. FACHB-402	275	23	43	C-C	2	12	9	(C)6-(C)6	coding
Leptolyngbya sp. FACHB-402	276	2612	2633	CA-A	2	12	10	(CA)3-(A)6	noncoding
Leptolyngbya sp. FACHB-402	277	20738	20751	T-TC	2	12	2	(T)6-(TC)3	coding
Leptolyngbya sp. FACHB-402	278	24760	24781	T-T	2	12	10	(T)6-(T)6	coding
Leptolyngbya sp. FACHB-402	279	37959	37980	TA-AT	2	12	10	(TA)3-(AT)3	coding
Leptolyngbya sp. FACHB-402	280	54609	54621	A-CA	2	12	1	(A)6-(CA)3	coding
Leptolyngbya sp. FACHB-402	281	59810	59828	T-A	2	13	6	(T)6-(A)7	coding
Leptolyngbya sp. FACHB-402	282	81158	81180	TCT-AG	2	15	8	(TCT)3-(AG)3	coding
Leptolyngbya sp. FACHB-402	283	83257	83276	GA-A	2	12	8	(GA)3-(A)6	noncoding
Leptolyngbya sp. FACHB-402	284	39	53	T-TC	2	12	3	(T)6-(TC)3	noncoding
Leptolyngbya sp. FACHB-402	285	42599	42617	TG-A	2	13	6	(TG)3-(A)7	noncoding
Leptolyngbya sp. FACHB-402	286	52382	52396	T-T	2	12	3	(T)6-(T)6	coding
Leptolyngbya sp. FACHB-402	287	60862	60879	CAT-CCA	2	18	0	(CAT)3-(CCA)3	coding
Leptolyngbya sp. FACHB-402	288	66390	66402	T-G	2	12	1	(T)6-(G)6	coding
Leptolyngbya sp. FACHB-402	289	77753	77770	CT-C	2	12	6	(CT)3-(C)6	coding
Leptolyngbya sp. FACHB-402	290	83253	83264	T-CG	2	12	0	(T)6-(CG)3	coding
Leptolyngbya sp. FACHB-402	291	87751	87765	GA-A	2	12	3	(GA)3-(A)6	noncoding
Leptolyngbya sp. FACHB-402	292	28223	28243	C-GA	2	12	9	(C)6-(GA)3	coding
Leptolyngbya sp. FACHB-402	293	37517	37533	TC-GC	2	14	3	(TC)3-(GC)4	coding
Leptolyngbya sp. FACHB-402	294	45687	45702	C-TC	2	14	2	(C)8-(TC)3	coding
Leptolyngbya sp. FACHB-402	295	70783	70796	T-TA	2	12	2	(T)6-(TA)3	noncoding
Leptolyngbya sp. FACHB-402	296	3893	3914	A-GT	2	12	10	(A)6-(GT)3	noncoding
Leptolyngbya sp. FACHB-402	297	21403	21415	T-A	2	12	1	(T)6-(A)6	noncoding
Leptolyngbya sp. FACHB-402	298	34457	34468	TC-T	2	12	0	(TC)3-(T)6	coding
Leptolyngbya sp. FACHB-402	299	63316	63332	CG-A	2	14	3	(CG)4-(A)6	coding
Leptolyngbya sp. FACHB-402	300	15474	15491	A-GA	2	12	6	(A)6-(GA)3	coding
Leptolyngbya sp. FACHB-402	301	28421	28440	A-TC	2	12	8	(A)6-(TC)3	noncoding
Leptolyngbya sp. FACHB-402	302	39680	39700	GA-A	2	15	6	(GA)4-(A)7	coding
Leptolyngbya sp. FACHB-402	303	89014	89031	AT-T	2	12	6	(AT)3-(T)6	coding
Leptolyngbya sp. FACHB-402	304	107564	107575	T-C	2	12	0	(T)6-(C)6	coding
Leptolyngbya sp. FACHB-402	305	111929	111951	A-A	2	15	8	(A)9-(A)6	noncoding
Leptolyngbya sp. FACHB-402	306	133460	133476	A-TC	2	12	5	(A)6-(TC)3	coding
Leptolyngbya sp. FACHB-402	307	145135	145156	A-GC	2	12	10	(A)6-(GC)3	noncoding
Leptolyngbya sp. FACHB-402	308	165365	165390	AGG-CGC	2	18	8	(AGG)3-(CGC)3	coding
Leptolyngbya sp. FACHB-402	309	181181	181207	T-T-A	3	19	8	(T)6-(T)7-(A)6	noncoding
Leptolyngbya sp. FACHB-402	310	213538	213557	AGC-GCA	2	18	2	(AGC)3-(GCA)3	coding
Leptolyngbya sp. FACHB-402	311	243588	243604	A-A	2	12	5	(A)6-(A)6	noncoding
Leptolyngbya sp. FACHB-402	312	244727	244742	AAT-A	2	15	1	(AAT)3-(A)6	noncoding
Leptolyngbya sp. FACHB-402	313	261979	261993	A-CTG	2	15	0	(A)6-(CTG)3	coding
Leptolyngbya sp. FACHB-402	314	270867	270881	A-A	2	12	3	(A)6-(A)6	noncoding
Leptolyngbya sp. FACHB-402	315	276329	276351	T-CAT	2	15	8	(T)6-(CAT)3	coding
Leptolyngbya sp. FACHB-402	316	284166	284194	A-TC-CA	3	18	11	(A)6-(TC)3-(CA)3	noncoding
Leptolyngbya sp. FACHB-402	317	309966	309983	CAG-AG	2	15	3	(CAG)3-(AG)3	coding
Leptolyngbya sp. FACHB-402	318	318651	318671	AT-A	2	12	9	(AT)3-(A)6	coding
Leptolyngbya sp. FACHB-402	319	360702	360718	CT-TGC	2	15	2	(CT)3-(TGC)3	coding
Leptolyngbya sp. FACHB-402	320	410897	410909	TG-AT	2	12	1	(TG)3-(AT)3	noncoding
Leptolyngbya sp. FACHB-402	321	23302	23318	T-A	2	12	5	(T)6-(A)6	noncoding
Leptolyngbya sp. FACHB-402	322	59247	59268	AG-AT	2	12	10	(AG)3-(AT)3	coding
Leptolyngbya sp. FACHB-402	323	77412	77426	GA-A	2	12	3	(GA)3-(A)6	noncoding
Leptolyngbya sp. FACHB-402	324	4067	4085	T-T	2	12	7	(T)6-(T)6	coding
Leptolyngbya sp. FACHB-402	325	4877	4905	CT-G-G	3	18	11	(CT)3-(G)6-(G)6	coding
Leptolyngbya sp. FACHB-402	326	22451	22478	ATCA-AC	2	18	10	(ATCA)3-(AC)3	coding
Leptolyngbya sp. FACHB-402	327	33782	33801	CTT-C	2	15	5	(CTT)3-(C)6	coding
Leptolyngbya sp. FACHB-402	328	35430	35450	GC-AG-TC	3	18	3	(GC)3-(AG)3-(TC)3	coding
Leptolyngbya sp. FACHB-402	329	46863	46877	CG-TAA	2	15	0	(CG)3-(TAA)3	coding
Leptolyngbya sp. FACHB-402	330	75868	75880	TG-AT	2	12	1	(TG)3-(AT)3	noncoding
Leptolyngbya sp. FACHB-402	331	6460	6479	T-GA	2	12	8	(T)6-(GA)3	coding
Leptolyngbya sp. FACHB-402	332	20914	20929	TA-CA	2	12	4	(TA)3-(CA)3	coding
Leptolyngbya sp. FACHB-402	333	41825	41838	AG-AG	2	12	2	(AG)3-(AG)3	noncoding
Leptolyngbya sp. FACHB-402	334	43156	43169	AG-GA	2	12	2	(AG)3-(GA)3	coding
Leptolyngbya sp. FACHB-402	335	47820	47834	GC-A	2	12	3	(GC)3-(A)6	coding
Leptolyngbya sp. FACHB-402	336	23518	23539	TC-CT	2	12	10	(TC)3-(CT)3	coding
Leptolyngbya sp. FACHB-402	337	49336	49357	TA-TC	2	12	10	(TA)3-(TC)3	noncoding
Leptolyngbya sp. FACHB-402	338	56782	56794	TG-A	2	12	1	(TG)3-(A)6	noncoding
Leptolyngbya sp. FACHB-402	339	3359	3375	TC-A	2	12	5	(TC)3-(A)6	noncoding
Leptolyngbya sp. FACHB-402	340	4067	4086	T-AT	2	12	8	(T)6-(AT)3	coding
Leptolyngbya sp. FACHB-402	341	7687	7707	TCA-T	2	15	6	(TCA)3-(T)6	noncoding
Leptolyngbya sp. FACHB-402	342	7811	7824	GA-TC	2	12	2	(GA)3-(TC)3	noncoding
Leptolyngbya sp. FACHB-402	343	21181	21194	AG-GA	2	12	2	(AG)3-(GA)3	coding
Leptolyngbya sp. FACHB-402	344	30396	30408	T-A	2	12	1	(T)6-(A)6	noncoding
Leptolyngbya sp. FACHB-402	345	47013	47029	T-AT	2	13	4	(T)7-(AT)3	noncoding
Leptolyngbya sp. FACHB-402	346	54604	54632	C-C-C	3	19	10	(C)6-(C)7-(C)6	coding
Leptolyngbya sp. FACHB-402	347	2165	2183	GT-CG	2	12	7	(GT)3-(CG)3	coding
Leptolyngbya sp. FACHB-402	348	28447	28466	GA-A	2	12	8	(GA)3-(A)6	noncoding
Leptolyngbya sp. FACHB-402	349	34042	34054	AC-A	2	12	1	(AC)3-(A)6	noncoding
Leptolyngbya sp. FACHB-402	350	38851	38870	AAC-A	2	18	2	(AAC)3-(A)9	noncoding
Leptolyngbya sp. FACHB-402	351	49650	49670	TC-AGT	2	15	6	(TC)3-(AGT)3	coding
Leptolyngbya sp. FACHB-402	352	5794	5812	C-AG	2	14	5	(C)8-(AG)3	noncoding
Leptolyngbya sp. FACHB-402	353	9755	9779	TGA-AG	2	15	10	(TGA)3-(AG)3	coding
Leptolyngbya sp. FACHB-402	354	33096	33113	CA-CT	2	14	4	(CA)4-(CT)3	noncoding
Leptolyngbya sp. FACHB-402	355	45997	46015	T-GT	2	12	7	(T)6-(GT)3	coding
Leptolyngbya sp. FACHB-402	356	48427	48446	T-GA	2	12	8	(T)6-(GA)3	noncoding
Leptolyngbya sp. FACHB-402	357	502	539	GA-T-A	3	20	18	(GA)3-(T)8-(A)6	noncoding
Leptolyngbya sp. FACHB-402	358	6821	6842	CGA-AAG	2	18	4	(CGA)3-(AAG)3	coding
Leptolyngbya sp. FACHB-402	359	11817	11830	CG-AG	2	12	2	(CG)3-(AG)3	coding
Leptolyngbya sp. FACHB-402	360	34395	34412	CG-T	2	12	6	(CG)3-(T)6	coding
Leptolyngbya sp. FACHB-402	361	37215	37232	CT-TCCT	2	18	0	(CT)3-(TCCT)3	coding
Leptolyngbya sp. FACHB-402	362	6459	6479	AAC-ATA	2	18	3	(AAC)3-(ATA)3	coding
Leptolyngbya sp. FACHB-402	363	10781	10797	A-A	2	13	4	(A)6-(A)7	noncoding
Leptolyngbya sp. FACHB-402	364	6610	6622	A-CG	2	12	1	(A)6-(CG)3	coding
Leptolyngbya sp. FACHB-402	365	12423	12438	A-GT	2	12	4	(A)6-(GT)3	coding
Leptolyngbya sp. FACHB-402	366	20116	20142	CAC-CTG	2	18	9	(CAC)3-(CTG)3	coding
Leptolyngbya sp. FACHB-402	367	22447	22475	TGC-CTG	2	21	8	(TGC)4-(CTG)3	coding
Leptolyngbya sp. FACHB-402	368	22664	22678	GA-TTC	2	15	0	(GA)3-(TTC)3	coding
Leptolyngbya sp. FACHB-402	369	46009	46029	AAG-ACG	2	18	3	(AAG)3-(ACG)3	coding
Leptolyngbya sp. FACHB-402	370	48024	48042	AG-CA	2	12	7	(AG)3-(CA)3	coding
Leptolyngbya sp. FACHB-402	371	56304	56320	AG-TA	2	12	5	(AG)3-(TA)3	coding
Leptolyngbya sp. FACHB-402	372	83519	83543	GCT-CTG	2	21	4	(GCT)4-(CTG)3	coding
Leptolyngbya sp. FACHB-402	373	86493	86512	AT-C	2	12	8	(AT)3-(C)6	coding
Leptolyngbya sp. FACHB-402	374	101105	101116	TA-A	2	12	0	(TA)3-(A)6	noncoding
Leptolyngbya sp. FACHB-402	375	114314	114328	A-A	2	12	3	(A)6-(A)6	noncoding
Leptolyngbya sp. FACHB-402	376	150212	150235	TC-AG	2	14	10	(TC)3-(AG)4	coding
Leptolyngbya sp. FACHB-402	377	152882	152897	A-A	2	12	4	(A)6-(A)6	noncoding
Leptolyngbya sp. FACHB-402	378	178376	178397	AT-TC	2	12	10	(AT)3-(TC)3	coding
Leptolyngbya sp. FACHB-402	379	181982	181996	T-GTA	2	15	0	(T)6-(GTA)3	noncoding
Leptolyngbya sp. FACHB-402	380	187352	187372	CG-GT	2	12	9	(CG)3-(GT)3	coding
Leptolyngbya sp. FACHB-402	381	200757	200771	CT-TC	2	12	3	(CT)3-(TC)3	noncoding
Leptolyngbya sp. FACHB-402	382	231712	231736	A-CTG	2	15	10	(A)6-(CTG)3	coding
Leptolyngbya sp. FACHB-402	383	232191	232203	A-AT	2	12	1	(A)6-(AT)3	coding
Leptolyngbya sp. FACHB-402	384	245858	245871	A-A	2	12	2	(A)6-(A)6	coding
Leptolyngbya sp. FACHB-402	385	246971	246989	GA-TC	2	12	7	(GA)3-(TC)3	coding
Leptolyngbya sp. FACHB-402	386	248653	248665	TC-T	2	12	1	(TC)3-(T)6	coding
Leptolyngbya sp. FACHB-402	387	277292	277313	CCT-T	2	15	7	(CCT)3-(T)6	noncoding
Leptolyngbya sp. FACHB-402	388	277756	277774	CG-GT	2	12	7	(CG)3-(GT)3	coding
Leptolyngbya sp. FACHB-402	389	286193	286211	AG-A	2	13	6	(AG)3-(A)7	noncoding
Leptolyngbya sp. FACHB-402	390	291090	291101	CG-A	2	12	0	(CG)3-(A)6	coding
Leptolyngbya sp. FACHB-402	391	29956	29977	T-CT	2	12	10	(T)6-(CT)3	coding
Leptolyngbya sp. FACHB-402	392	39060	39074	TC-CG	2	12	3	(TC)3-(CG)3	coding
Leptolyngbya sp. FACHB-402	393	40840	40865	A-T-AC	3	19	7	(A)6-(T)7-(AC)3	coding
Leptolyngbya sp. FACHB-402	394	36408	36447	T-AG-T-T	4	27	13	(T)7-(AG)3-(T)8-(T)6	noncoding
Leptolyngbya sp. FACHB-402	395	41821	41842	A-TC	2	12	10	(A)6-(TC)3	noncoding
Leptolyngbya sp. FACHB-402	396	11244	11264	CG-AT	2	12	9	(CG)3-(AT)3	coding
Leptolyngbya sp. FACHB-402	397	17861	17882	CG-GC	2	12	10	(CG)3-(GC)3	coding
Leptolyngbya sp. FACHB-402	398	17822	17842	TAC-A	2	15	6	(TAC)3-(A)6	coding
Leptolyngbya sp. FACHB-402	399	18092	18116	TA-AGC	2	15	10	(TA)3-(AGC)3	coding
Leptolyngbya sp. FACHB-402	400	20121	20150	GA-A-CG	3	19	11	(GA)3-(A)7-(CG)3	coding
Leptolyngbya sp. FACHB-402	401	41280	41294	GA-A	2	12	3	(GA)3-(A)6	noncoding
Leptolyngbya sp. FACHB-402	402	16038	16061	TG-TGC	2	15	9	(TG)3-(TGC)3	coding
Leptolyngbya sp. FACHB-402	403	37252	37265	A-T	2	12	2	(A)6-(T)6	noncoding
Leptolyngbya sp. FACHB-402	404	5313	5332	TC-TAG	2	15	5	(TC)3-(TAG)3	coding
Leptolyngbya sp. FACHB-402	405	12195	12207	T-GC	2	12	1	(T)6-(GC)3	coding
Leptolyngbya sp. FACHB-402	406	24398	24417	GA-GA	2	12	8	(GA)3-(GA)3	coding
Leptolyngbya sp. FACHB-402	407	24969	24990	T-AC	2	12	10	(T)6-(AC)3	noncoding
Leptolyngbya sp. FACHB-402	408	4643	4657	TCA-A	2	15	0	(TCA)3-(A)6	coding
Leptolyngbya sp. FACHB-402	409	12805	12826	GA-AAG	2	15	7	(GA)3-(AAG)3	coding
Leptolyngbya sp. FACHB-402	410	125	139	CT-GC	2	12	3	(CT)3-(GC)3	coding
Leptolyngbya sp. FACHB-402	411	280	296	T-T	2	13	4	(T)7-(T)6	noncoding
Leptolyngbya sp. FACHB-402	412	19669	19688	A-A	2	12	8	(A)6-(A)6	noncoding
Leptolyngbya sp. FACHB-402	413	24905	24926	T-CA	2	12	10	(T)6-(CA)3	coding
Leptolyngbya sp. FACHB-402	414	5358	5369	TC-A	2	12	0	(TC)3-(A)6	coding
Leptolyngbya sp. FACHB-402	415	13130	13148	T-ATT	2	15	4	(T)6-(ATT)3	noncoding
Leptolyngbya sp. FACHB-402	416	18601	18614	TG-G	2	12	2	(TG)3-(G)6	coding
Leptolyngbya sp. FACHB-402	417	15030	15046	GTG-GA	2	15	2	(GTG)3-(GA)3	coding
Leptolyngbya sp. FACHB-402	418	23672	23693	TTG-T	2	16	6	(TTG)3-(T)7	coding
Leptolyngbya sp. FACHB-402	419	53885	53899	CA-T	2	12	3	(CA)3-(T)6	coding
Leptolyngbya sp. FACHB-402	420	61405	61419	TG-T	2	12	3	(TG)3-(T)6	noncoding
Leptolyngbya sp. FACHB-402	421	95167	95206	T-AC-A-AT	4	25	15	(T)7-(AC)3-(A)6-(AT)3	noncoding
Leptolyngbya sp. FACHB-402	422	95951	95970	A-CCA	2	16	4	(A)7-(CCA)3	coding
Leptolyngbya sp. FACHB-402	423	102131	102152	T-AG	2	14	8	(T)6-(AG)4	noncoding
Leptolyngbya sp. FACHB-402	424	106214	106235	T-GC	2	12	10	(T)6-(GC)3	coding
Leptolyngbya sp. FACHB-402	425	125885	125898	TA-TA	2	12	2	(TA)3-(TA)3	noncoding
Leptolyngbya sp. FACHB-402	426	132234	132251	T-A	2	13	5	(T)6-(A)7	noncoding
Leptolyngbya sp. FACHB-402	427	149776	149789	T-GA	2	13	1	(T)7-(GA)3	coding
Leptolyngbya sp. FACHB-402	428	156841	156861	CT-T	2	12	9	(CT)3-(T)6	noncoding
Leptolyngbya sp. FACHB-402	429	169217	169231	AG-TCG	2	15	0	(AG)3-(TCG)3	coding
Leptolyngbya sp. FACHB-402	430	196460	196472	GA-AG	2	12	1	(GA)3-(AG)3	coding
Leptolyngbya sp. FACHB-402	431	204112	204132	TC-TC	2	12	9	(TC)3-(TC)3	noncoding
Leptolyngbya sp. FACHB-402	432	216844	216857	TA-CT	2	12	2	(TA)3-(CT)3	coding
Leptolyngbya sp. FACHB-402	433	238492	238511	GC-AGA	2	15	5	(GC)3-(AGA)3	coding
Leptolyngbya sp. FACHB-402	434	244242	244253	GA-A	2	12	0	(GA)3-(A)6	noncoding
Leptolyngbya sp. FACHB-402	435	247544	247569	GCA-TC	2	18	8	(GCA)4-(TC)3	coding
Leptolyngbya sp. FACHB-402	436	248303	248327	CGA-T	2	15	10	(CGA)3-(T)6	coding
Leptolyngbya sp. FACHB-402	437	255587	255604	A-AG	2	12	6	(A)6-(AG)3	coding
Leptolyngbya sp. FACHB-402	438	272859	272878	AC-CG	2	12	8	(AC)3-(CG)3	coding
Leptolyngbya sp. FACHB-402	439	274541	274553	A-CG	2	12	1	(A)6-(CG)3	coding
Leptolyngbya sp. FACHB-402	440	283675	283689	T-TC	2	13	2	(T)7-(TC)3	noncoding
Leptolyngbya sp. FACHB-402	441	303228	303240	AG-GA	2	12	1	(AG)3-(GA)3	coding
Leptolyngbya sp. FACHB-402	442	310742	310753	AG-T	2	12	0	(AG)3-(T)6	coding
Leptolyngbya sp. FACHB-402	443	20690	20704	GA-A	2	12	3	(GA)3-(A)6	noncoding
Leptolyngbya sp. FACHB-402	444	4684	4698	A-AC	2	12	3	(A)6-(AC)3	coding
Leptolyngbya sp. FACHB-402	445	17343	17360	TC-A	2	12	6	(TC)3-(A)6	coding
Leptolyngbya sp. FACHB-402	446	5190	5209	TGC-CTG	2	18	2	(TGC)3-(CTG)3	coding
Leptolyngbya sp. FACHB-402	447	17241	17256	CG-AG	2	12	4	(CG)3-(AG)3	coding
Leptolyngbya sp. FACHB-402	448	9775	9795	TC-GA	2	12	9	(TC)3-(GA)3	noncoding
Leptolyngbya sp. FACHB-402	449	15192	15206	GA-A	2	12	3	(GA)3-(A)6	noncoding
Leptolyngbya sp. FACHB-402	450	11067	11091	TC-GAA	2	15	10	(TC)3-(GAA)3	coding
Leptolyngbya sp. FACHB-402	451	11478	11494	A-A	2	12	5	(A)6-(A)6	coding
Leptolyngbya sp. FACHB-402	452	8995	9021	AG-TTC-TTC	3	24	3	(AG)3-(TTC)3-(TTC)3	coding
Leptolyngbya sp. FACHB-402	453	51809	51830	AG-CG	2	12	10	(AG)3-(CG)3	noncoding
Leptolyngbya sp. FACHB-402	454	61075	61092	CA-CCG	2	17	1	(CA)4-(CCG)3	coding
Leptolyngbya sp. FACHB-402	455	94199	94215	GA-AG	2	14	3	(GA)3-(AG)4	coding
Leptolyngbya sp. FACHB-402	456	95580	95592	AC-T	2	12	1	(AC)3-(T)6	coding
Leptolyngbya sp. FACHB-402	457	108456	108472	GA-G	2	12	5	(GA)3-(G)6	noncoding
Leptolyngbya sp. FACHB-402	458	136270	136287	T-T	2	12	6	(T)6-(T)6	coding
Leptolyngbya sp. FACHB-402	459	137292	137308	GC-AG	2	12	5	(GC)3-(AG)3	coding
Leptolyngbya sp. FACHB-402	460	138202	138218	CT-TC	2	16	1	(CT)4-(TC)4	noncoding
Leptolyngbya sp. FACHB-402	461	146319	146334	T-A	2	12	4	(T)6-(A)6	coding
Leptolyngbya sp. FACHB-402	462	150928	150941	CG-CT	2	12	2	(CG)3-(CT)3	coding
Leptolyngbya sp. FACHB-402	463	157745	157766	CA-A	2	12	10	(CA)3-(A)6	coding
Leptolyngbya sp. FACHB-402	464	178438	178449	CT-CA	2	12	0	(CT)3-(CA)3	noncoding
Leptolyngbya sp. FACHB-402	465	183723	183742	G-AG	2	12	8	(G)6-(AG)3	coding
Leptolyngbya sp. FACHB-402	466	185514	185535	A-T	2	14	8	(A)7-(T)7	noncoding
Leptolyngbya sp. FACHB-402	467	192708	192751	GA-A-TC-TA	4	24	20	(GA)3-(A)6-(TC)3-(TA)3	noncoding
Leptolyngbya sp. FACHB-402	468	199470	199484	AGC-GA	2	15	0	(AGC)3-(GA)3	coding
Leptolyngbya sp. FACHB-402	469	223403	223424	TG-T	2	12	10	(TG)3-(T)6	coding
Leptolyngbya sp. FACHB-402	470	226488	226501	TG-GA	2	12	2	(TG)3-(GA)3	noncoding
Leptolyngbya sp. FACHB-402	471	232671	232695	GTT-T	2	15	10	(GTT)3-(T)6	coding
Leptolyngbya sp. FACHB-402	472	241113	241133	A-CA	2	12	9	(A)6-(CA)3	noncoding
Leptolyngbya sp. FACHB-402	473	241337	241363	AAG-ATC	2	18	9	(AAG)3-(ATC)3	coding
Leptolyngbya sp. FACHB-402	474	244216	244235	TC-TC	2	12	8	(TC)3-(TC)3	coding
Leptolyngbya sp. FACHB-402	475	247416	247436	A-CT	2	12	9	(A)6-(CT)3	noncoding
Leptolyngbya sp. FACHB-402	476	1305	1319	T-GCA	2	15	0	(T)6-(GCA)3	coding
Leptolyngbya sp. FACHB-402	477	136	148	G-T	2	12	1	(G)6-(T)6	noncoding
Leptolyngbya sp. FACHB-402	478	13076	13096	GA-AG	2	12	9	(GA)3-(AG)3	noncoding
Leptolyngbya sp. FACHB-402	479	7191	7211	TC-T	2	12	9	(TC)3-(T)6	coding
Leptolyngbya sp. FACHB-402	480	7761	7779	CG-A	2	13	6	(CG)3-(A)7	coding
Leptolyngbya sp. FACHB-402	481	240	260	T-GT	2	12	9	(T)6-(GT)3	noncoding
Leptolyngbya sp. FACHB-402	482	4784	4807	A-GA	2	16	8	(A)6-(GA)5	coding
Leptolyngbya sp. FACHB-402	483	9498	9520	GCA-CG	2	15	8	(GCA)3-(CG)3	coding
Leptolyngbya sp. FACHB-402	484	27650	27672	CG-GC	2	14	9	(CG)3-(GC)4	coding
Leptolyngbya sp. FACHB-402	485	33187	33201	A-GAA	2	15	0	(A)6-(GAA)3	coding
Leptolyngbya sp. FACHB-402	486	46506	46518	AG-CT	2	12	1	(AG)3-(CT)3	noncoding
Leptolyngbya sp. FACHB-402	487	63329	63346	CA-GT	2	12	6	(CA)3-(GT)3	coding
Leptolyngbya sp. FACHB-402	488	66607	66627	GA-GA	2	12	9	(GA)3-(GA)3	coding
Leptolyngbya sp. FACHB-402	489	74045	74065	CT-A	2	12	9	(CT)3-(A)6	coding
Leptolyngbya sp. FACHB-402	490	74275	74294	GC-A	2	12	8	(GC)3-(A)6	coding
Leptolyngbya sp. FACHB-402	491	88046	88057	CG-A	2	12	0	(CG)3-(A)6	coding
Leptolyngbya sp. FACHB-402	492	102466	102478	GC-T	2	12	1	(GC)3-(T)6	coding
Leptolyngbya sp. FACHB-402	493	124191	124205	CAA-TC	2	15	0	(CAA)3-(TC)3	coding
Leptolyngbya sp. FACHB-402	494	125510	125526	A-C	2	12	5	(A)6-(C)6	coding
Leptolyngbya sp. FACHB-402	495	136632	136648	GT-TG	2	12	5	(GT)3-(TG)3	coding
Leptolyngbya sp. FACHB-402	496	142779	142792	AG-TG	2	12	2	(AG)3-(TG)3	noncoding
Leptolyngbya sp. FACHB-402	497	154204	154228	CAA-TCT	2	18	7	(CAA)3-(TCT)3	coding
Leptolyngbya sp. FACHB-402	498	159382	159403	GC-CCA	2	15	7	(GC)3-(CCA)3	coding
Leptolyngbya sp. FACHB-402	499	214375	214392	CGA-GA	2	15	3	(CGA)3-(GA)3	coding
Leptolyngbya sp. FACHB-402	500	3992	4004	CG-TG	2	12	1	(CG)3-(TG)3	coding
Leptolyngbya sp. FACHB-402	501	4286	4307	AT-A	2	12	10	(AT)3-(A)6	noncoding
Leptolyngbya sp. FACHB-402	502	6076	6094	TCC-T	2	15	4	(TCC)3-(T)6	noncoding
Leptolyngbya sp. FACHB-402	503	4873	4897	GA-ACC	2	15	10	(GA)3-(ACC)3	coding
Leptolyngbya sp. FACHB-402	504	514	528	C-C	2	12	3	(C)6-(C)6	coding
Leptolyngbya sp. FACHB-402	505	39	53	T-TC	2	12	3	(T)6-(TC)3	noncoding
Leptolyngbya sp. FACHB-402	506	3595	3627	GGA-A-A	3	22	11	(GGA)3-(A)6-(A)7	coding
Leptolyngbya sp. FACHB-402	507	3441	3462	A-TCA	2	15	7	(A)6-(TCA)3	coding
Leptolyngbya sp. FACHB-402	508	3595	3622	TC-AT-T	3	19	9	(TC)3-(AT)3-(T)7	coding
Leptolyngbya sp. FACHB-402	509	41708	41722	AT-A	2	12	3	(AT)3-(A)6	noncoding
Leptolyngbya sp. FACHB-402	510	92916	92927	CG-GT	2	12	0	(CG)3-(GT)3	coding
Leptolyngbya sp. FACHB-402	511	93471	93490	GC-A	2	12	8	(GC)3-(A)6	coding
Leptolyngbya sp. FACHB-402	512	104201	104221	TG-TG	2	12	9	(TG)3-(TG)3	coding
Leptolyngbya sp. FACHB-402	513	112208	112227	CTT-GT	2	15	5	(CTT)3-(GT)3	coding
Leptolyngbya sp. FACHB-402	514	114277	114292	A-T	2	12	4	(A)6-(T)6	noncoding
Leptolyngbya sp. FACHB-402	515	172187	172209	TGA-CT	2	15	8	(TGA)3-(CT)3	coding
Leptolyngbya sp. FACHB-402	516	174775	174788	A-T	2	13	1	(A)7-(T)6	coding
Leptolyngbya sp. FACHB-402	517	177461	177483	A-A	2	13	10	(A)6-(A)7	noncoding
Leptolyngbya sp. FACHB-402	518	183386	183407	GA-TC-T	3	18	4	(GA)3-(TC)3-(T)6	noncoding
Leptolyngbya sp. FACHB-402	519	192269	192284	GCT-A	2	15	1	(GCT)3-(A)6	coding
Leptolyngbya sp. FACHB-402	520	204843	204862	A-T	2	13	7	(A)7-(T)6	coding
Leptolyngbya sp. FACHB-402	521	836	853	GA-GC	2	12	6	(GA)3-(GC)3	coding
Leptolyngbya sp. FACHB-402	522	2717	2733	GA-G	2	14	3	(GA)4-(G)6	coding
Leptolyngbya sp. FACHB-402	523	7713	7731	GAA-GA	2	17	2	(GAA)3-(GA)4	coding
Leptolyngbya sp. FACHB-402	524	17873	17885	GC-CA	2	12	1	(GC)3-(CA)3	coding
Leptolyngbya sp. FACHB-402	525	19171	19184	AT-CT	2	12	2	(AT)3-(CT)3	noncoding
Leptolyngbya sp. FACHB-402	526	34457	34475	A-A	2	12	7	(A)6-(A)6	noncoding
Leptolyngbya sp. FACHB-402	527	39203	39216	GC-A	2	12	2	(GC)3-(A)6	coding
Leptolyngbya sp. FACHB-402	528	43444	43465	CT-T	2	12	10	(CT)3-(T)6	noncoding
Leptolyngbya sp. FACHB-402	529	121000	121015	AG-GA	2	14	2	(AG)3-(GA)4	noncoding
Leptolyngbya sp. FACHB-402	530	125765	125776	GA-TC	2	12	0	(GA)3-(TC)3	coding
Leptolyngbya sp. FACHB-402	531	130553	130568	GC-TCG	2	15	1	(GC)3-(TCG)3	coding
Leptolyngbya sp. FACHB-402	532	131527	131546	C-C	2	12	8	(C)6-(C)6	coding
Leptolyngbya sp. FACHB-402	533	137640	137656	CG-AC	2	12	5	(CG)3-(AC)3	coding
Leptolyngbya sp. FACHB-402	534	154251	154268	A-GT	2	12	6	(A)6-(GT)3	coding
Leptolyngbya sp. FACHB-402	535	165615	165641	CT-A-TG	3	18	9	(CT)3-(A)6-(TG)3	coding
Leptolyngbya sp. FACHB-402	536	178645	178667	GA-TGA	2	15	8	(GA)3-(TGA)3	coding
Leptolyngbya sp. FACHB-402	537	188287	188303	CT-GA	2	12	5	(CT)3-(GA)3	coding
Leptolyngbya sp. FACHB-402	538	193936	193977	ATC-TC-CTTC	3	27	15	(ATC)3-(TC)3-(CTTC)3	coding
Leptolyngbya sp. FACHB-402	539	194143	194163	GGC-ACC	2	18	3	(GGC)3-(ACC)3	coding
Leptolyngbya boryana dg5	1	66852	66874	AC-T-AG	3	18	5	(AC)3-(T)6-(AG)3	noncoding
Leptolyngbya boryana dg5	2	67956	67971	AT-AC	2	12	4	(AT)3-(AC)3	coding
Leptolyngbya boryana dg5	3	68158	68177	TC-AC	2	14	6	(TC)4-(AC)3	noncoding
Leptolyngbya boryana dg5	4	80729	80743	T-T	2	12	3	(T)6-(T)6	coding
Leptolyngbya boryana dg5	5	157241	157258	TC-CT	2	12	6	(TC)3-(CT)3	coding
Leptolyngbya boryana dg5	6	163280	163300	ACT-GA	2	15	6	(ACT)3-(GA)3	coding
Leptolyngbya boryana dg5	7	174080	174099	T-GTT	2	18	2	(T)9-(GTT)3	noncoding
Leptolyngbya boryana dg5	8	178896	178908	T-GT	2	12	1	(T)6-(GT)3	noncoding
Leptolyngbya boryana dg5	9	184484	184503	T-TC	2	12	8	(T)6-(TC)3	noncoding
Leptolyngbya boryana dg5	10	210767	210785	CG-AC	2	12	7	(CG)3-(AC)3	coding
Leptolyngbya boryana dg5	11	219850	219871	GT-A	2	12	10	(GT)3-(A)6	noncoding
Leptolyngbya boryana dg5	12	220423	220441	TC-CT	2	12	7	(TC)3-(CT)3	coding
Leptolyngbya boryana dg5	13	232633	232645	GC-A	2	12	1	(GC)3-(A)6	coding
Leptolyngbya boryana dg5	14	249103	249120	GC-TC	2	12	6	(GC)3-(TC)3	noncoding
Leptolyngbya boryana dg5	15	270538	270552	GA-A	2	12	3	(GA)3-(A)6	noncoding
Leptolyngbya boryana dg5	16	284866	284878	T-A	2	12	1	(T)6-(A)6	noncoding
Leptolyngbya boryana dg5	17	299595	299608	GA-TC	2	12	2	(GA)3-(TC)3	noncoding
Leptolyngbya boryana dg5	18	390008	390028	AG-T	2	12	9	(AG)3-(T)6	noncoding
Leptolyngbya boryana dg5	19	393209	393228	GA-GA	2	12	8	(GA)3-(GA)3	coding
Leptolyngbya boryana dg5	20	396081	396105	GAT-TTC	2	18	7	(GAT)3-(TTC)3	coding
Leptolyngbya boryana dg5	21	396310	396331	GT-T	2	12	10	(GT)3-(T)6	noncoding
Leptolyngbya boryana dg5	22	404749	404773	A-AAC	2	15	10	(A)6-(AAC)3	coding
Leptolyngbya boryana dg5	23	410943	410955	TC-AC	2	12	1	(TC)3-(AC)3	noncoding
Leptolyngbya boryana dg5	24	414020	414041	A-CA	2	12	10	(A)6-(CA)3	coding
Leptolyngbya boryana dg5	25	437960	437974	TC-GCT	2	15	0	(TC)3-(GCT)3	coding
Leptolyngbya boryana dg5	26	444693	444736	TA-GA-T-TC	4	24	20	(TA)3-(GA)3-(T)6-(TC)3	noncoding
Leptolyngbya boryana dg5	27	451909	451930	A-T	2	14	8	(A)7-(T)7	noncoding
Leptolyngbya boryana dg5	28	453701	453721	TC-C	2	12	9	(TC)3-(C)6	coding
Leptolyngbya boryana dg5	29	458995	459006	TG-AG	2	12	0	(TG)3-(AG)3	coding
Leptolyngbya boryana dg5	30	479678	479699	T-TG	2	12	10	(T)6-(TG)3	coding
Leptolyngbya boryana dg5	31	486503	486516	AG-CG	2	12	2	(AG)3-(CG)3	coding
Leptolyngbya boryana dg5	32	491110	491125	T-A	2	12	4	(T)6-(A)6	coding
Leptolyngbya boryana dg5	33	499225	499242	AG-AG	2	16	2	(AG)4-(AG)4	noncoding
Leptolyngbya boryana dg5	34	500136	500152	CT-GC	2	12	5	(CT)3-(GC)3	noncoding
Leptolyngbya boryana dg5	35	501157	501174	A-A	2	12	6	(A)6-(A)6	coding
Leptolyngbya boryana dg5	36	528972	528988	C-TC	2	12	5	(C)6-(TC)3	noncoding
Leptolyngbya boryana dg5	37	541852	541863	A-TG	2	12	0	(A)6-(TG)3	coding
Leptolyngbya boryana dg5	38	543228	543245	TC-TC	2	14	4	(TC)4-(TC)3	coding
Leptolyngbya boryana dg5	39	575739	575756	CGG-TG	2	17	1	(CGG)3-(TG)4	coding
Leptolyngbya boryana dg5	40	585001	585022	CG-CT	2	12	10	(CG)3-(CT)3	noncoding
Leptolyngbya boryana dg5	41	627810	627836	GAA-GAA-CT	3	24	3	(GAA)3-(GAA)3-(CT)3	coding
Leptolyngbya boryana dg5	42	640198	640211	A-T	2	12	2	(A)6-(T)6	noncoding
Leptolyngbya boryana dg5	43	661401	661425	AGC-CA	2	15	10	(AGC)3-(CA)3	coding
Leptolyngbya boryana dg5	44	678558	678572	T-TC	2	12	3	(T)6-(TC)3	noncoding
Leptolyngbya boryana dg5	45	698705	698724	A-T	2	13	7	(A)6-(T)7	coding
Leptolyngbya boryana dg5	46	711283	711297	T-CAG	2	15	0	(T)6-(CAG)3	coding
Leptolyngbya boryana dg5	47	720160	720181	A-GA-TC	3	18	4	(A)6-(GA)3-(TC)3	coding
Leptolyngbya boryana dg5	48	726084	726106	T-T	2	13	10	(T)7-(T)6	noncoding
Leptolyngbya boryana dg5	49	728779	728792	A-T	2	13	1	(A)6-(T)7	coding
Leptolyngbya boryana dg5	50	731358	731380	AG-TCA	2	15	8	(AG)3-(TCA)3	noncoding
Leptolyngbya boryana dg5	51	768371	768392	GA-GCA	2	15	7	(GA)3-(GCA)3	coding
Leptolyngbya boryana dg5	52	789275	789290	A-T	2	12	4	(A)6-(T)6	noncoding
Leptolyngbya boryana dg5	53	791340	791358	AC-GAA	2	15	4	(AC)3-(GAA)3	coding
Leptolyngbya boryana dg5	54	799346	799366	CA-CA	2	12	9	(CA)3-(CA)3	coding
Leptolyngbya boryana dg5	55	810077	810096	T-GC	2	12	8	(T)6-(GC)3	coding
Leptolyngbya boryana dg5	56	810640	810651	AC-CG	2	12	0	(AC)3-(CG)3	coding
Leptolyngbya boryana dg5	57	861845	861859	T-AT	2	12	3	(T)6-(AT)3	noncoding
Leptolyngbya boryana dg5	58	899945	899972	A-AT-GA	3	19	9	(A)7-(AT)3-(GA)3	coding
Leptolyngbya boryana dg5	59	900105	900126	TGA-T	2	15	7	(TGA)3-(T)6	coding
Leptolyngbya boryana dg5	60	937031	937051	C-GA	2	12	9	(C)6-(GA)3	coding
Leptolyngbya boryana dg5	61	946325	946341	TC-GC	2	14	3	(TC)3-(GC)4	coding
Leptolyngbya boryana dg5	62	954495	954510	C-TC	2	14	2	(C)8-(TC)3	coding
Leptolyngbya boryana dg5	63	979591	979604	T-TA	2	12	2	(T)6-(TA)3	noncoding
Leptolyngbya boryana dg5	64	994563	994577	T-TC	2	12	3	(T)6-(TC)3	noncoding
Leptolyngbya boryana dg5	65	999064	999075	CG-A	2	12	0	(CG)3-(A)6	coding
Leptolyngbya boryana dg5	66	1004558	1004574	G-GA	2	12	5	(G)6-(GA)3	coding
Leptolyngbya boryana dg5	67	1015926	1015938	C-A	2	12	1	(C)6-(A)6	coding
Leptolyngbya boryana dg5	68	1021449	1021466	TGG-ATG	2	18	0	(TGG)3-(ATG)3	coding
Leptolyngbya boryana dg5	69	1029932	1029946	A-A	2	12	3	(A)6-(A)6	coding
Leptolyngbya boryana dg5	70	1039711	1039729	T-CA	2	13	6	(T)7-(CA)3	noncoding
Leptolyngbya boryana dg5	71	1082275	1082289	GA-A	2	12	3	(GA)3-(A)6	noncoding
Leptolyngbya boryana dg5	72	1093360	1093375	GA-A	2	12	4	(GA)3-(A)6	noncoding
Leptolyngbya boryana dg5	73	1099531	1099551	AC-T	2	12	9	(AC)3-(T)6	noncoding
Leptolyngbya boryana dg5	74	1106918	1106933	CT-GA	2	14	2	(CT)4-(GA)3	coding
Leptolyngbya boryana dg5	75	1128759	1128778	CT-T	2	12	8	(CT)3-(T)6	noncoding
Leptolyngbya boryana dg5	76	1139734	1139750	CA-T	2	13	4	(CA)3-(T)7	noncoding
Leptolyngbya boryana dg5	77	1148528	1148539	A-GC	2	12	0	(A)6-(GC)3	noncoding
Leptolyngbya boryana dg5	78	1164675	1164693	A-CA	2	13	6	(A)7-(CA)3	noncoding
Leptolyngbya boryana dg5	79	1179908	1179926	TC-GTT	2	15	4	(TC)3-(GTT)3	coding
Leptolyngbya boryana dg5	80	1186269	1186293	CAT-T	2	15	10	(CAT)3-(T)6	coding
Leptolyngbya boryana dg5	81	1222787	1222803	T-T	2	13	4	(T)7-(T)6	noncoding
Leptolyngbya boryana dg5	82	1227103	1227125	ATT-GTT	2	18	5	(ATT)3-(GTT)3	coding
Leptolyngbya boryana dg5	83	1238557	1238576	TGC-CTG	2	18	2	(TGC)3-(CTG)3	coding
Leptolyngbya boryana dg5	84	1251786	1251798	AT-CA	2	12	1	(AT)3-(CA)3	noncoding
Leptolyngbya boryana dg5	85	1280789	1280803	TTA-CG	2	15	0	(TTA)3-(CG)3	coding
Leptolyngbya boryana dg5	86	1292216	1292236	GA-TC-GC	3	18	3	(GA)3-(TC)3-(GC)3	coding
Leptolyngbya boryana dg5	87	1292987	1293011	CG-CAG	2	15	10	(CG)3-(CAG)3	coding
Leptolyngbya boryana dg5	88	1293865	1293883	G-GAA	2	15	4	(G)6-(GAA)3	coding
Leptolyngbya boryana dg5	89	1305188	1305215	GT-TGAT	2	18	10	(GT)3-(TGAT)3	coding
Leptolyngbya boryana dg5	90	1322761	1322789	C-C-AG	3	18	11	(C)6-(C)6-(AG)3	coding
Leptolyngbya boryana dg5	91	1323581	1323599	A-A	2	12	7	(A)6-(A)6	coding
Leptolyngbya boryana dg5	92	1329919	1329938	TC-A	2	12	8	(TC)3-(A)6	noncoding
Leptolyngbya boryana dg5	93	1332350	1332368	AC-A	2	12	7	(AC)3-(A)6	coding
Leptolyngbya boryana dg5	94	1396571	1396592	TGG-GCC	2	18	4	(TGG)3-(GCC)3	coding
Leptolyngbya boryana dg5	95	1396758	1396799	GAAG-GA-GAT	3	27	15	(GAAG)3-(GA)3-(GAT)3	coding
Leptolyngbya boryana dg5	96	1402432	1402447	TC-GA	2	12	4	(TC)3-(GA)3	coding
Leptolyngbya boryana dg5	97	1412067	1412089	ATC-CT	2	15	8	(ATC)3-(CT)3	coding
Leptolyngbya boryana dg5	98	1425094	1425120	CA-T-AG	3	18	9	(CA)3-(T)6-(AG)3	coding
Leptolyngbya boryana dg5	99	1436467	1436484	AC-T	2	12	6	(AC)3-(T)6	coding
Leptolyngbya boryana dg5	100	1453079	1453095	GT-CG	2	12	5	(GT)3-(CG)3	coding
Leptolyngbya boryana dg5	101	1459189	1459208	G-G	2	12	8	(G)6-(G)6	coding
Leptolyngbya boryana dg5	102	1460167	1460182	CGA-GC	2	15	1	(CGA)3-(GC)3	coding
Leptolyngbya boryana dg5	103	1464959	1464970	GA-TC	2	12	0	(GA)3-(TC)3	coding
Leptolyngbya boryana dg5	104	1469720	1469735	TC-CT	2	14	2	(TC)4-(CT)3	noncoding
Leptolyngbya boryana dg5	105	1476385	1476404	A-CG	2	12	8	(A)6-(CG)3	coding
Leptolyngbya boryana dg5	106	1484166	1484177	T-AG	2	12	0	(T)6-(AG)3	coding
Leptolyngbya boryana dg5	107	1556051	1556072	A-AG	2	12	10	(A)6-(AG)3	noncoding
Leptolyngbya boryana dg5	108	1560300	1560313	T-GC	2	12	2	(T)6-(GC)3	coding
Leptolyngbya boryana dg5	109	1565041	1565059	T-T	2	12	7	(T)6-(T)6	noncoding
Leptolyngbya boryana dg5	110	1580332	1580345	AG-AT	2	12	2	(AG)3-(AT)3	noncoding
Leptolyngbya boryana dg5	111	1581631	1581643	TG-GC	2	12	1	(TG)3-(GC)3	coding
Leptolyngbya boryana dg5	112	1591785	1591802	TC-CTT	2	17	1	(TC)4-(CTT)3	coding
Leptolyngbya boryana dg5	113	1596783	1596798	C-CT	2	14	2	(C)6-(CT)4	coding
Leptolyngbya boryana dg5	114	1600669	1600680	GT-CT	2	12	0	(GT)3-(CT)3	coding
Leptolyngbya boryana dg5	115	1601510	1601529	A-GC	2	13	7	(A)7-(GC)3	coding
Leptolyngbya boryana dg5	116	1604534	1604555	CG-GT	2	14	8	(CG)4-(GT)3	coding
Leptolyngbya boryana dg5	117	1679764	1679786	TGA-A	2	18	5	(TGA)4-(A)6	coding
Leptolyngbya boryana dg5	118	1682578	1682594	A-CT	2	14	3	(A)8-(CT)3	coding
Leptolyngbya boryana dg5	119	1690412	1690424	A-CT	2	12	1	(A)6-(CT)3	noncoding
Leptolyngbya boryana dg5	120	1707668	1707688	A-A	2	13	8	(A)7-(A)6	noncoding
Leptolyngbya boryana dg5	121	1709374	1709388	T-A	2	12	3	(T)6-(A)6	noncoding
Leptolyngbya boryana dg5	122	1747402	1747426	T-TGC	2	15	10	(T)6-(TGC)3	coding
Leptolyngbya boryana dg5	123	1754986	1754997	GA-AG	2	12	0	(GA)3-(AG)3	coding
Leptolyngbya boryana dg5	124	1755076	1755087	GA-AG	2	12	0	(GA)3-(AG)3	coding
Leptolyngbya boryana dg5	125	1755166	1755177	GA-AG	2	12	0	(GA)3-(AG)3	coding
Leptolyngbya boryana dg5	126	1766252	1766269	G-CG	2	12	6	(G)6-(CG)3	coding
Leptolyngbya boryana dg5	127	1769686	1769697	T-GT	2	12	0	(T)6-(GT)3	noncoding
Leptolyngbya boryana dg5	128	1772087	1772106	GA-A	2	12	8	(GA)3-(A)6	noncoding
Leptolyngbya boryana dg5	129	1778263	1778274	T-CT	2	12	0	(T)6-(CT)3	noncoding
Leptolyngbya boryana dg5	130	1782364	1782378	GA-A	2	12	3	(GA)3-(A)6	noncoding
Leptolyngbya boryana dg5	131	1817501	1817512	T-CG	2	12	0	(T)6-(CG)3	coding
Leptolyngbya boryana dg5	132	1822391	1822408	T-TC	2	13	5	(T)7-(TC)3	noncoding
Leptolyngbya boryana dg5	133	1830827	1830846	CA-CG	2	12	8	(CA)3-(CG)3	coding
Leptolyngbya boryana dg5	134	1831289	1831310	A-AGG	2	15	7	(A)6-(AGG)3	noncoding
Leptolyngbya boryana dg5	135	1859937	1859949	A-GA	2	12	1	(A)6-(GA)3	coding
Leptolyngbya boryana dg5	136	1861613	1861631	GA-TC	2	12	7	(GA)3-(TC)3	coding
Leptolyngbya boryana dg5	137	1862731	1862744	T-T	2	12	2	(T)6-(T)6	coding
Leptolyngbya boryana dg5	138	1876399	1876411	AT-T	2	12	1	(AT)3-(T)6	coding
Leptolyngbya boryana dg5	139	1907831	1907844	GA-GA	2	12	2	(GA)3-(GA)3	noncoding
Leptolyngbya boryana dg5	140	1921230	1921250	AC-CG	2	12	9	(AC)3-(CG)3	coding
Leptolyngbya boryana dg5	141	1926606	1926620	TAC-A	2	15	0	(TAC)3-(A)6	coding
Leptolyngbya boryana dg5	142	1930205	1930226	GA-AT	2	12	10	(GA)3-(AT)3	coding
Leptolyngbya boryana dg5	143	1955807	1955822	T-T	2	12	4	(T)6-(T)6	noncoding
Leptolyngbya boryana dg5	144	1958469	1958491	CT-AG	2	14	9	(CT)4-(AG)3	coding
Leptolyngbya boryana dg5	145	1994376	1994390	T-T	2	12	3	(T)6-(T)6	noncoding
Leptolyngbya boryana dg5	146	2022213	2022232	G-AT	2	12	8	(G)6-(AT)3	coding
Leptolyngbya boryana dg5	147	2025182	2025204	CAG-GCA	2	21	2	(CAG)3-(GCA)4	coding
Leptolyngbya boryana dg5	148	2052405	2052421	TA-CT	2	12	5	(TA)3-(CT)3	coding
Leptolyngbya boryana dg5	149	2060683	2060700	TG-TC	2	12	6	(TG)3-(TC)3	coding
Leptolyngbya boryana dg5	150	2062695	2062716	TCG-CTT	2	18	4	(TCG)3-(CTT)3	coding
Leptolyngbya boryana dg5	151	2086046	2086061	AGA-TC	2	15	1	(AGA)3-(TC)3	coding
Leptolyngbya boryana dg5	152	2086250	2086278	CAG-GCA	2	21	8	(CAG)3-(GCA)4	coding
Leptolyngbya boryana dg5	153	2088583	2088607	CAG-TGG	2	18	7	(CAG)3-(TGG)3	coding
Leptolyngbya boryana dg5	154	2096287	2096302	AC-T	2	12	4	(AC)3-(T)6	coding
Leptolyngbya boryana dg5	155	2102102	2102115	GC-T	2	12	2	(GC)3-(T)6	coding
Leptolyngbya boryana dg5	156	2141024	2141040	TC-GTC	2	15	2	(TC)3-(GTC)3	coding
Leptolyngbya boryana dg5	157	2196012	2196034	GTG-GC	2	15	8	(GTG)3-(GC)3	coding
Leptolyngbya boryana dg5	158	2201188	2201212	AGA-TTG	2	18	7	(AGA)3-(TTG)3	coding
Leptolyngbya boryana dg5	159	2212624	2212637	CA-CT	2	12	2	(CA)3-(CT)3	noncoding
Leptolyngbya boryana dg5	160	2218768	2218784	CA-AC	2	12	5	(CA)3-(AC)3	coding
Leptolyngbya boryana dg5	161	2229890	2229906	G-T	2	12	5	(G)6-(T)6	coding
Leptolyngbya boryana dg5	162	2231211	2231225	GA-TTG	2	15	0	(GA)3-(TTG)3	coding
Leptolyngbya boryana dg5	163	2252938	2252950	A-GC	2	12	1	(A)6-(GC)3	coding
Leptolyngbya boryana dg5	164	2267359	2267370	T-CG	2	12	0	(T)6-(CG)3	coding
Leptolyngbya boryana dg5	165	2281122	2281141	T-GC	2	12	8	(T)6-(GC)3	coding
Leptolyngbya boryana dg5	166	2281351	2281371	T-AG	2	12	9	(T)6-(AG)3	coding
Leptolyngbya boryana dg5	167	2288789	2288809	TC-TC	2	12	9	(TC)3-(TC)3	coding
Leptolyngbya boryana dg5	168	2292069	2292086	CA-GT	2	12	6	(CA)3-(GT)3	coding
Leptolyngbya boryana dg5	169	2308898	2308909	AG-TC	2	12	0	(AG)3-(TC)3	noncoding
Leptolyngbya boryana dg5	170	2322215	2322229	TTC-T	2	15	0	(TTC)3-(T)6	coding
Leptolyngbya boryana dg5	171	2327744	2327766	GC-CG	2	14	9	(GC)4-(CG)3	coding
Leptolyngbya boryana dg5	172	2345896	2345917	CG-CTG	2	15	7	(CG)3-(CTG)3	coding
Leptolyngbya boryana dg5	173	2350609	2350632	TC-T	2	16	8	(TC)5-(T)6	coding
Leptolyngbya boryana dg5	174	2355156	2355176	AC-A	2	12	9	(AC)3-(A)6	noncoding
Leptolyngbya boryana dg5	175	2356144	2356161	GA-GC	2	12	6	(GA)3-(GC)3	noncoding
Leptolyngbya boryana dg5	176	2360614	2360625	T-GA	2	12	0	(T)6-(GA)3	noncoding
Leptolyngbya boryana dg5	177	2370788	2370807	T-T	2	12	8	(T)6-(T)6	noncoding
Leptolyngbya boryana dg5	178	2378778	2378796	T-TC	2	12	7	(T)6-(TC)3	coding
Leptolyngbya boryana dg5	179	2406486	2406504	A-T	2	12	7	(A)6-(T)6	coding
Leptolyngbya boryana dg5	180	2423010	2423027	CT-T	2	12	6	(CT)3-(T)6	coding
Leptolyngbya boryana dg5	181	2440610	2440623	GA-TC	2	14	0	(GA)3-(TC)4	coding
Leptolyngbya boryana dg5	182	2451012	2451023	GC-TC	2	12	0	(GC)3-(TC)3	noncoding
Leptolyngbya boryana dg5	183	2453017	2453031	T-T	2	12	3	(T)6-(T)6	coding
Leptolyngbya boryana dg5	184	2470693	2470708	CT-TC	2	12	4	(CT)3-(TC)3	noncoding
Leptolyngbya boryana dg5	185	2474032	2474046	A-A	2	12	3	(A)6-(A)6	noncoding
Leptolyngbya boryana dg5	186	2480327	2480347	GA-AG	2	14	7	(GA)3-(AG)4	noncoding
Leptolyngbya boryana dg5	187	2488087	2488108	T-TA	2	15	7	(T)7-(TA)4	noncoding
Leptolyngbya boryana dg5	188	2490768	2490784	A-A	2	13	4	(A)6-(A)7	coding
Leptolyngbya boryana dg5	189	2499516	2499537	AC-G	2	12	10	(AC)3-(G)6	coding
Leptolyngbya boryana dg5	190	2510809	2510829	CG-C	2	12	9	(CG)3-(C)6	coding
Leptolyngbya boryana dg5	191	2515599	2515628	TC-CT-CG	3	20	10	(TC)4-(CT)3-(CG)3	noncoding
Leptolyngbya boryana dg5	192	2532332	2532345	TA-GC	2	12	2	(TA)3-(GC)3	noncoding
Leptolyngbya boryana dg5	193	2541989	2542003	A-AG	2	13	2	(A)7-(AG)3	coding
Leptolyngbya boryana dg5	194	2548621	2548639	A-A	2	12	7	(A)6-(A)6	noncoding
Leptolyngbya boryana dg5	195	2558280	2558294	CT-GC	2	12	3	(CT)3-(GC)3	coding
Leptolyngbya boryana dg5	196	2558435	2558451	T-T	2	13	4	(T)7-(T)6	noncoding
Leptolyngbya boryana dg5	197	2577823	2577842	A-A	2	12	8	(A)6-(A)6	noncoding
Leptolyngbya boryana dg5	198	2583059	2583080	T-CA	2	12	10	(T)6-(CA)3	coding
Leptolyngbya boryana dg5	199	2598899	2598910	A-CT	2	12	0	(A)6-(CT)3	coding
Leptolyngbya boryana dg5	200	2606412	2606424	TC-CT	2	12	1	(TC)3-(CT)3	coding
Leptolyngbya boryana dg5	201	2614252	2614263	A-GA	2	12	0	(A)6-(GA)3	noncoding
Leptolyngbya boryana dg5	202	2625962	2625977	AG-A	2	13	3	(AG)3-(A)7	noncoding
Leptolyngbya boryana dg5	203	2635098	2635110	CG-T	2	12	1	(CG)3-(T)6	coding
Leptolyngbya boryana dg5	204	2636773	2636792	CG-GT	2	12	8	(CG)3-(GT)3	coding
Leptolyngbya boryana dg5	205	2654047	2654064	CT-T	2	12	6	(CT)3-(T)6	coding
Leptolyngbya boryana dg5	206	2661324	2661348	A-TCG	2	15	10	(A)6-(TCG)3	coding
Leptolyngbya boryana dg5	207	2662082	2662106	GA-CTG	2	18	7	(GA)3-(CTG)4	coding
Leptolyngbya boryana dg5	208	2672161	2672180	TCT-GC	2	15	5	(TCT)3-(GC)3	coding
Leptolyngbya boryana dg5	209	2693815	2693828	AG-TA	2	12	2	(AG)3-(TA)3	coding
Leptolyngbya boryana dg5	210	2706539	2706559	AG-AG	2	12	9	(AG)3-(AG)3	noncoding
Leptolyngbya boryana dg5	211	2714200	2714212	CT-TC	2	12	1	(CT)3-(TC)3	coding
Leptolyngbya boryana dg5	212	2741441	2741455	CGA-CT	2	15	0	(CGA)3-(CT)3	coding
Leptolyngbya boryana dg5	213	2753811	2753826	A-A	2	12	4	(A)6-(A)6	noncoding
Leptolyngbya boryana dg5	214	2760883	2760896	TC-A	2	13	1	(TC)3-(A)7	coding
Leptolyngbya boryana dg5	215	2778421	2778438	T-A	2	13	5	(T)7-(A)6	noncoding
Leptolyngbya boryana dg5	216	2784774	2784787	TA-TA	2	12	2	(TA)3-(TA)3	noncoding
Leptolyngbya boryana dg5	217	2804437	2804458	GC-A	2	12	10	(GC)3-(A)6	coding
Leptolyngbya boryana dg5	218	2808520	2808541	CT-A	2	14	8	(CT)4-(A)6	noncoding
Leptolyngbya boryana dg5	219	2814702	2814721	TGG-T	2	16	4	(TGG)3-(T)7	coding
Leptolyngbya boryana dg5	220	2815465	2815505	TA-T-GT-A	4	25	16	(TA)3-(T)6-(GT)3-(A)7	noncoding
Leptolyngbya boryana dg5	221	2849253	2849266	A-AC	2	12	2	(A)6-(AC)3	noncoding
Leptolyngbya boryana dg5	222	2856773	2856787	A-TG	2	12	3	(A)6-(TG)3	coding
Leptolyngbya boryana dg5	223	2886979	2886998	A-AAC	2	16	4	(A)7-(AAC)3	coding
Leptolyngbya boryana dg5	224	2895626	2895642	TC-CAC	2	15	2	(TC)3-(CAC)3	coding
Leptolyngbya boryana dg5	225	2915864	2915876	CG-TG	2	12	1	(CG)3-(TG)3	coding
Leptolyngbya boryana dg5	226	2916158	2916179	AT-A	2	12	10	(AT)3-(A)6	noncoding
Leptolyngbya boryana dg5	227	2917948	2917966	TCC-T	2	15	4	(TCC)3-(T)6	coding
Leptolyngbya boryana dg5	228	2924177	2924188	TC-A	2	12	0	(TC)3-(A)6	coding
Leptolyngbya boryana dg5	229	2931949	2931967	T-ATT	2	15	4	(T)6-(ATT)3	noncoding
Leptolyngbya boryana dg5	230	2937420	2937433	TG-G	2	12	2	(TG)3-(G)6	coding
Leptolyngbya boryana dg5	231	2946219	2946233	T-TC	2	12	3	(T)6-(TC)3	noncoding
Leptolyngbya boryana dg5	232	2948014	2948028	T-A	2	14	1	(T)6-(A)8	noncoding
Leptolyngbya boryana dg5	233	2948426	2948440	TG-CG	2	12	3	(TG)3-(CG)3	coding
Leptolyngbya boryana dg5	234	2964070	2964087	GA-T	2	12	6	(GA)3-(T)6	coding
Leptolyngbya boryana dg5	235	2977097	2977120	CTG-CAA	2	18	6	(CTG)3-(CAA)3	coding
Leptolyngbya boryana dg5	236	2997729	2997744	GT-A	2	13	3	(GT)3-(A)7	noncoding
Leptolyngbya boryana dg5	237	3004536	3004553	A-A	2	12	6	(A)6-(A)6	coding
Leptolyngbya boryana dg5	238	3008645	3008664	A-CG	2	12	8	(A)6-(CG)3	coding
Leptolyngbya boryana dg5	239	3026375	3026395	A-T	2	12	9	(A)6-(T)6	coding
Leptolyngbya boryana dg5	240	3031831	3031863	T-C-C	3	18	15	(T)6-(C)6-(C)6	noncoding
Leptolyngbya boryana dg5	241	3032836	3032854	CG-ATT	2	15	4	(CG)3-(ATT)3	coding
Leptolyngbya boryana dg5	242	3036869	3036885	C-C	2	12	5	(C)6-(C)6	noncoding
Leptolyngbya boryana dg5	243	3037503	3037524	GA-T	2	12	10	(GA)3-(T)6	noncoding
Leptolyngbya boryana dg5	244	3056998	3057010	CT-T	2	12	1	(CT)3-(T)6	noncoding
Leptolyngbya boryana dg5	245	3087208	3087228	A-AG	2	12	9	(A)6-(AG)3	noncoding
Leptolyngbya boryana dg5	246	3091688	3091700	GC-AG	2	12	1	(GC)3-(AG)3	coding
Leptolyngbya boryana dg5	247	3093302	3093323	TG-AG	2	14	8	(TG)3-(AG)4	noncoding
Leptolyngbya boryana dg5	248	3113020	3113042	TTCC-G	2	18	5	(TTCC)3-(G)6	noncoding
Leptolyngbya boryana dg5	249	3126568	3126585	TC-A	2	12	6	(TC)3-(A)6	noncoding
Leptolyngbya boryana dg5	250	3134046	3134060	T-TC	2	12	3	(T)6-(TC)3	noncoding
Leptolyngbya boryana dg5	251	3152204	3152225	AT-CT	2	12	10	(AT)3-(CT)3	coding
Leptolyngbya boryana dg5	252	3188154	3188170	T-A	2	12	5	(T)6-(A)6	noncoding
Leptolyngbya boryana dg5	253	3212835	3212852	GA-GC	2	12	6	(GA)3-(GC)3	noncoding
Leptolyngbya boryana dg5	254	3223748	3223770	CT-AGA	2	15	8	(CT)3-(AGA)3	coding
Leptolyngbya boryana dg5	255	3245100	3245118	T-A	2	13	6	(T)7-(A)6	coding
Leptolyngbya boryana dg5	256	3250307	3250319	TG-T	2	12	1	(TG)3-(T)6	coding
Leptolyngbya boryana dg5	257	3266948	3266969	AT-TA	2	12	10	(AT)3-(TA)3	coding
Leptolyngbya boryana dg5	258	3280147	3280168	A-A	2	12	10	(A)6-(A)6	coding
Leptolyngbya boryana dg5	259	3284176	3284190	AG-A	2	12	3	(AG)3-(A)6	coding
Leptolyngbya boryana dg5	260	3302295	3302316	T-TG	2	12	10	(T)6-(TG)3	noncoding
Leptolyngbya boryana dg5	261	3304885	3304905	G-G	2	12	9	(G)6-(G)6	coding
Leptolyngbya boryana dg5	262	3304966	3304994	G-G-G	3	19	10	(G)6-(G)7-(G)6	coding
Leptolyngbya boryana dg5	263	3312569	3312585	AT-A	2	13	4	(AT)3-(A)7	noncoding
Leptolyngbya boryana dg5	264	3329190	3329202	T-A	2	12	1	(T)6-(A)6	coding
Leptolyngbya boryana dg5	265	3338404	3338417	TC-CT	2	12	2	(TC)3-(CT)3	coding
Leptolyngbya boryana dg5	266	3351773	3351786	AG-CT	2	12	2	(AG)3-(CT)3	noncoding
Leptolyngbya boryana dg5	267	3351891	3351911	A-TGA	2	15	6	(A)6-(TGA)3	noncoding
Leptolyngbya boryana dg5	268	3355512	3355531	AT-A	2	12	8	(AT)3-(A)6	noncoding
Leptolyngbya boryana dg5	269	3356223	3356238	T-AG	2	12	4	(T)6-(AG)3	noncoding
Leptolyngbya boryana dg5	270	3374709	3374741	A-AC-AT	3	20	13	(A)6-(AC)3-(AT)4	noncoding
Leptolyngbya boryana dg5	271	3380147	3380167	T-CG	2	12	9	(T)6-(CG)3	coding
Leptolyngbya boryana dg5	272	3404711	3404734	GC-TG	2	14	10	(GC)4-(TG)3	coding
Leptolyngbya boryana dg5	273	3444931	3444944	A-GC	2	12	2	(A)6-(GC)3	coding
Leptolyngbya boryana dg5	274	3459545	3459567	GCA-GA	2	17	6	(GCA)3-(GA)4	coding
Leptolyngbya boryana dg5	275	3515896	3515917	GC-CG	2	12	10	(GC)3-(CG)3	coding
Leptolyngbya boryana dg5	276	3522514	3522534	AT-CG	2	12	9	(AT)3-(CG)3	coding
Leptolyngbya boryana dg5	277	3534782	3534799	C-G	2	12	6	(C)6-(G)6	noncoding
Leptolyngbya boryana dg5	278	3558388	3558404	AG-GA	2	12	5	(AG)3-(GA)3	coding
Leptolyngbya boryana dg5	279	3570476	3570497	G-C	2	17	5	(G)9-(C)8	noncoding
Leptolyngbya boryana dg5	280	3573921	3573939	GA-G	2	12	7	(GA)3-(G)6	coding
Leptolyngbya boryana dg5	281	3577110	3577161	GT-GT-GT-GT-GT	5	40	12	(GT)4-(GT)4-(GT)4-(GT)4-(GT)4	noncoding
Leptolyngbya boryana dg5	282	3600995	3601018	GTT-AC	2	15	9	(GTT)3-(AC)3	coding
Leptolyngbya boryana dg5	283	3604089	3604106	AG-CG	2	12	6	(AG)3-(CG)3	coding
Leptolyngbya boryana dg5	284	3612601	3612621	AAC-AAC	2	18	3	(AAC)3-(AAC)3	coding
Leptolyngbya boryana dg5	285	3625944	3625958	A-CT	2	12	3	(A)6-(CT)3	coding
Leptolyngbya boryana dg5	286	3646848	3646863	AT-TC	2	12	4	(AT)3-(TC)3	coding
Leptolyngbya boryana dg5	287	3652953	3652974	T-T	2	15	7	(T)9-(T)6	noncoding
Leptolyngbya boryana dg5	288	3674720	3674739	GAT-TC	2	15	5	(GAT)3-(TC)3	coding
Leptolyngbya boryana dg5	289	3712388	3712403	T-A	2	12	4	(T)6-(A)6	noncoding
Leptolyngbya boryana dg5	290	3732330	3732345	AG-GC	2	12	4	(AG)3-(GC)3	coding
Leptolyngbya boryana dg5	291	3753118	3753140	CAG-CG	2	15	8	(CAG)3-(CG)3	coding
Leptolyngbya boryana dg5	292	3765910	3765930	GT-CG	2	14	7	(GT)3-(CG)4	coding
Leptolyngbya boryana dg5	293	3768271	3768287	C-CA	2	12	5	(C)6-(CA)3	coding
Leptolyngbya boryana dg5	294	3789248	3789262	T-A	2	12	3	(T)6-(A)6	coding
Leptolyngbya boryana dg5	295	3800108	3800119	GA-TC	2	12	0	(GA)3-(TC)3	coding
Leptolyngbya boryana dg5	296	3809450	3809471	A-AG	2	12	10	(A)6-(AG)3	coding
Leptolyngbya boryana dg5	297	3817601	3817620	AG-A	2	12	8	(AG)3-(A)6	noncoding
Leptolyngbya boryana dg5	298	3829092	3829111	CAG-A	2	16	4	(CAG)3-(A)7	noncoding
Leptolyngbya boryana dg5	299	3831946	3831966	TC-TC	2	12	9	(TC)3-(TC)3	noncoding
Leptolyngbya boryana dg5	300	3877723	3877743	CA-T	2	12	9	(CA)3-(T)6	coding
Leptolyngbya boryana dg5	301	3895257	3895269	T-CT	2	12	1	(T)6-(CT)3	noncoding
Leptolyngbya boryana dg5	302	3897049	3897063	TG-A	2	13	2	(TG)3-(A)7	coding
Leptolyngbya boryana dg5	303	3907767	3907789	TC-AAC	2	15	8	(TC)3-(AAC)3	coding
Leptolyngbya boryana dg5	304	3927507	3927524	GCC-T	2	16	2	(GCC)3-(T)7	coding
Leptolyngbya boryana dg5	305	3936623	3936640	T-GA	2	12	6	(T)6-(GA)3	coding
Leptolyngbya boryana dg5	306	3943010	3943023	G-T	2	12	2	(G)6-(T)6	coding
Leptolyngbya boryana dg5	307	4001099	4001120	GT-T	2	12	10	(GT)3-(T)6	coding
Leptolyngbya boryana dg5	308	4002948	4002962	AG-CT	2	12	3	(AG)3-(CT)3	coding
Leptolyngbya boryana dg5	309	4010300	4010325	TTC-CGC	2	18	8	(TTC)3-(CGC)3	coding
Leptolyngbya boryana dg5	310	4034892	4034906	GA-T	2	12	3	(GA)3-(T)6	noncoding
Leptolyngbya boryana dg5	311	4040584	4040601	AG-A	2	12	6	(AG)3-(A)6	noncoding
Leptolyngbya boryana dg5	312	4041646	4041662	T-AG	2	12	5	(T)6-(AG)3	noncoding
Leptolyngbya boryana dg5	313	4056793	4056809	CG-GT	2	12	5	(CG)3-(GT)3	noncoding
Leptolyngbya boryana dg5	314	4090313	4090331	A-GC	2	12	7	(A)6-(GC)3	noncoding
Leptolyngbya boryana dg5	315	4098508	4098531	AAG-CA	2	15	9	(AAG)3-(CA)3	coding
Leptolyngbya boryana dg5	316	4106252	4106267	G-A	2	14	2	(G)8-(A)6	coding
Leptolyngbya boryana dg5	317	4111996	4112041	A-CG-GA-T	4	24	22	(A)6-(CG)3-(GA)3-(T)6	noncoding
Leptolyngbya boryana dg5	318	4113280	4113300	GT-TCAT	2	18	3	(GT)3-(TCAT)3	noncoding
Leptolyngbya boryana dg5	319	4115662	4115682	GA-CT	2	12	9	(GA)3-(CT)3	coding
Leptolyngbya boryana dg5	320	4117684	4117701	AG-TC	2	12	6	(AG)3-(TC)3	coding
Leptolyngbya boryana dg5	321	4119861	4119888	TA-TA-TA	3	20	8	(TA)3-(TA)4-(TA)3	noncoding
Leptolyngbya boryana dg5	322	4124218	4124242	TGC-T-GT	3	21	4	(TGC)3-(T)6-(GT)3	noncoding
Leptolyngbya boryana dg5	323	4124486	4124498	T-AC	2	12	1	(T)6-(AC)3	coding
Leptolyngbya boryana dg5	324	4129715	4129726	GT-CA	2	12	0	(GT)3-(CA)3	coding
Leptolyngbya boryana dg5	325	4144460	4144484	AG-TTC	2	15	10	(AG)3-(TTC)3	coding
Leptolyngbya boryana dg5	326	4167648	4167668	TC-AGC	2	15	6	(TC)3-(AGC)3	coding
Leptolyngbya boryana dg5	327	4168225	4168239	AT-AT	2	12	3	(AT)3-(AT)3	noncoding
Leptolyngbya boryana dg5	328	4168756	4168774	TG-AGA	2	15	4	(TG)3-(AGA)3	noncoding
Leptolyngbya boryana dg5	329	4174480	4174500	GT-GC	2	12	9	(GT)3-(GC)3	coding
Leptolyngbya boryana dg5	330	4177923	4177952	AG-TC-T	3	18	12	(AG)3-(TC)3-(T)6	coding
Leptolyngbya boryana dg5	331	4185477	4185492	AG-AG	2	12	4	(AG)3-(AG)3	coding
Leptolyngbya boryana dg5	332	4198849	4198866	A-CG	2	12	6	(A)6-(CG)3	coding
Leptolyngbya boryana dg5	333	4212012	4212028	T-A	2	12	5	(T)6-(A)6	coding
Leptolyngbya boryana dg5	334	4212636	4212652	CT-A	2	12	5	(CT)3-(A)6	coding
Leptolyngbya boryana dg5	335	4214412	4214425	GA-GC	2	12	2	(GA)3-(GC)3	noncoding
Leptolyngbya boryana dg5	336	4239398	4239411	T-C	2	12	2	(T)6-(C)6	coding
Leptolyngbya boryana dg5	337	4265120	4265139	CTG-TC	2	15	5	(CTG)3-(TC)3	coding
Leptolyngbya boryana dg5	338	4293005	4293029	GA-ACC	2	15	10	(GA)3-(ACC)3	coding
Leptolyngbya boryana dg5	339	4337033	4337046	CG-CT	2	12	2	(CG)3-(CT)3	noncoding
Leptolyngbya boryana dg5	340	4370792	4370806	A-C	2	13	2	(A)7-(C)6	coding
Leptolyngbya boryana dg5	341	4373933	4373953	CT-A	2	12	9	(CT)3-(A)6	coding
Leptolyngbya boryana dg5	342	4375628	4375660	TC-CG-AT	3	18	15	(TC)3-(CG)3-(AT)3	coding
Leptolyngbya boryana dg5	343	4380841	4380859	A-CT	2	12	7	(A)6-(CT)3	noncoding
Leptolyngbya boryana dg5	344	4394717	4394734	A-AG	2	12	6	(A)6-(AG)3	noncoding
Leptolyngbya boryana dg5	345	4404531	4404548	A-CG	2	12	6	(A)6-(CG)3	coding
Leptolyngbya boryana dg5	346	4411881	4411895	CT-TC	2	12	3	(CT)3-(TC)3	coding
Leptolyngbya boryana dg5	347	4418619	4418631	A-TC	2	12	1	(A)6-(TC)3	coding
Leptolyngbya boryana dg5	348	4430433	4430453	TC-T	2	12	9	(TC)3-(T)6	noncoding
Leptolyngbya boryana dg5	349	4434518	4434532	CT-GC	2	12	3	(CT)3-(GC)3	coding
Leptolyngbya boryana dg5	350	4457615	4457634	GC-T	2	12	8	(GC)3-(T)6	coding
Leptolyngbya boryana dg5	351	4479168	4479182	C-A	2	12	3	(C)6-(A)6	coding
Leptolyngbya boryana dg5	352	4485112	4485133	GC-GA	2	12	10	(GC)3-(GA)3	coding
Leptolyngbya boryana dg5	353	4488471	4488493	A-T	2	13	10	(A)6-(T)7	noncoding
Leptolyngbya boryana dg5	354	4528521	4528542	GC-T	2	14	8	(GC)4-(T)6	coding
Leptolyngbya boryana dg5	355	4537707	4537725	CG-AG	2	12	7	(CG)3-(AG)3	coding
Leptolyngbya boryana dg5	356	4552878	4552889	A-GC	2	12	0	(A)6-(GC)3	coding
Leptolyngbya boryana dg5	357	4582704	4582719	T-TC	2	15	1	(T)7-(TC)4	coding
Leptolyngbya boryana dg5	358	4594062	4594080	GAT-T	2	15	4	(GAT)3-(T)6	coding
Leptolyngbya boryana dg5	359	4606307	4606325	A-CAG	2	15	4	(A)6-(CAG)3	noncoding
Leptolyngbya boryana dg5	360	4611551	4611567	G-T	2	12	5	(G)6-(T)6	noncoding
Leptolyngbya boryana dg5	361	4617956	4617972	AG-AG	2	12	5	(AG)3-(AG)3	noncoding
Leptolyngbya boryana dg5	362	4639167	4639182	A-A	2	13	3	(A)6-(A)7	coding
Leptolyngbya boryana dg5	363	4680734	4680755	AAG-AG	2	15	7	(AAG)3-(AG)3	coding
Leptolyngbya boryana dg5	364	4681294	4681312	TG-T	2	12	7	(TG)3-(T)6	coding
Leptolyngbya boryana dg5	365	4684230	4684251	CG-A	2	12	10	(CG)3-(A)6	coding
Leptolyngbya boryana dg5	366	4685347	4685366	A-A	2	12	8	(A)6-(A)6	noncoding
Leptolyngbya boryana dg5	367	4691017	4691036	GA-T	2	12	8	(GA)3-(T)6	coding
Leptolyngbya boryana dg5	368	4699486	4699503	T-TC	2	13	5	(T)7-(TC)3	coding
Leptolyngbya boryana dg5	369	4722207	4722224	TC-GA	2	14	4	(TC)4-(GA)3	coding
Leptolyngbya boryana dg5	370	4722247	4722262	T-T	2	12	4	(T)6-(T)6	coding
Leptolyngbya boryana dg5	371	4724323	4724341	AG-CA	2	12	7	(AG)3-(CA)3	coding
Leptolyngbya boryana dg5	372	4732811	4732823	CA-GA	2	12	1	(CA)3-(GA)3	coding
Leptolyngbya boryana dg5	373	4742466	4742487	TC-CT	2	12	10	(TC)3-(CT)3	coding
Leptolyngbya boryana dg5	374	4762787	4762803	T-T	2	12	5	(T)6-(T)6	noncoding
Leptolyngbya boryana dg5	375	4776784	4776796	TC-A	2	12	1	(TC)3-(A)6	coding
Leptolyngbya boryana dg5	376	4778710	4778730	AG-T	2	12	9	(AG)3-(T)6	coding
Leptolyngbya boryana dg5	377	4785338	4785359	AT-T	2	12	10	(AT)3-(T)6	coding
Leptolyngbya boryana dg5	378	4788203	4788218	AC-TC	2	12	4	(AC)3-(TC)3	coding
Leptolyngbya boryana dg5	379	4805561	4805579	T-T	2	12	7	(T)6-(T)6	noncoding
Leptolyngbya boryana dg5	380	4810164	4810184	CG-CGA	2	15	6	(CG)3-(CGA)3	coding
Leptolyngbya boryana dg5	381	4868427	4868450	TGC-GA	2	15	9	(TGC)3-(GA)3	coding
Leptolyngbya boryana dg5	382	4885902	4885914	A-TA	2	12	1	(A)6-(TA)3	noncoding
Leptolyngbya boryana dg5	383	4890621	4890641	CT-GA	2	12	9	(CT)3-(GA)3	noncoding
Leptolyngbya boryana dg5	384	4919564	4919581	GC-AC	2	12	6	(GC)3-(AC)3	coding
Leptolyngbya boryana dg5	385	4923361	4923391	T-A-A	3	19	12	(T)6-(A)7-(A)6	noncoding
Leptolyngbya boryana dg5	386	4925917	4925929	CA-CA	2	12	1	(CA)3-(CA)3	coding
Leptolyngbya boryana dg5	387	4927426	4927449	T-CT-GA	3	18	6	(T)6-(CT)3-(GA)3	noncoding
Leptolyngbya boryana dg5	388	4936117	4936133	C-T	2	12	5	(C)6-(T)6	coding
Leptolyngbya boryana dg5	389	4950525	4950538	A-GC	2	12	2	(A)6-(GC)3	coding
Leptolyngbya boryana dg5	390	4951200	4951220	CAG-GCA	2	18	3	(CAG)3-(GCA)3	coding
Leptolyngbya boryana dg5	391	4958105	4958116	CT-TG	2	12	0	(CT)3-(TG)3	coding
Leptolyngbya boryana dg5	392	4968595	4968608	A-A	2	12	2	(A)6-(A)6	noncoding
Leptolyngbya boryana dg5	393	4973844	4973858	TC-T	2	14	1	(TC)3-(T)8	noncoding
Leptolyngbya boryana dg5	394	4980863	4980878	CT-A	2	12	4	(CT)3-(A)6	coding
Leptolyngbya boryana dg5	395	4989778	4989792	GA-TC	2	12	3	(GA)3-(TC)3	coding
Leptolyngbya boryana dg5	396	5003617	5003638	TG-CT	2	12	10	(TG)3-(CT)3	noncoding
Leptolyngbya boryana dg5	397	5011193	5011208	TC-AG	2	12	4	(TC)3-(AG)3	coding
Leptolyngbya boryana dg5	398	5014960	5014980	CT-TGC	2	15	6	(CT)3-(TGC)3	coding
Leptolyngbya boryana dg5	399	5020353	5020364	CA-AG	2	12	0	(CA)3-(AG)3	noncoding
Leptolyngbya boryana dg5	400	5044811	5044825	GA-TC	2	12	3	(GA)3-(TC)3	coding
Leptolyngbya boryana dg5	401	5080677	5080692	T-TG	2	12	4	(T)6-(TG)3	coding
Leptolyngbya boryana dg5	402	5092338	5092353	AC-A	2	12	4	(AC)3-(A)6	coding
Leptolyngbya boryana dg5	403	5099514	5099534	A-GA	2	12	9	(A)6-(GA)3	coding
Leptolyngbya boryana dg5	404	5100414	5100427	GA-CT	2	14	0	(GA)4-(CT)3	noncoding
Leptolyngbya boryana dg5	405	5146733	5146749	T-A	2	13	4	(T)7-(A)6	noncoding
Leptolyngbya boryana dg5	406	5166078	5166101	GGA-A	2	16	8	(GGA)3-(A)7	coding
Leptolyngbya boryana dg5	407	5179046	5179065	T-T	2	12	8	(T)6-(T)6	noncoding
Leptolyngbya boryana dg5	408	5187519	5187540	TGG-CG	2	15	7	(TGG)3-(CG)3	coding
Leptolyngbya boryana dg5	409	5197051	5197067	CT-CT	2	12	5	(CT)3-(CT)3	coding
Leptolyngbya boryana dg5	410	5197710	5197728	GA-T	2	15	4	(GA)4-(T)7	coding
Leptolyngbya boryana dg5	411	5203181	5203201	CT-T	2	12	9	(CT)3-(T)6	coding
Leptolyngbya boryana dg5	412	5213726	5213743	CT-A	2	12	6	(CT)3-(A)6	noncoding
Leptolyngbya boryana dg5	413	5236845	5236862	TGC-GA	2	15	3	(TGC)3-(GA)3	coding
Leptolyngbya boryana dg5	414	5238310	5238329	TTG-AG	2	15	5	(TTG)3-(AG)3	coding
Leptolyngbya boryana dg5	415	5244700	5244717	CA-AGCA	2	18	0	(CA)3-(AGCA)3	coding
Leptolyngbya boryana dg5	416	5254273	5254292	GA-CA	2	12	8	(GA)3-(CA)3	coding
Leptolyngbya boryana dg5	417	5257415	5257441	GAA-GAA	2	24	3	(GAA)4-(GAA)4	coding
Leptolyngbya boryana dg5	418	5267402	5267413	AC-T	2	12	0	(AC)3-(T)6	coding
Leptolyngbya boryana dg5	419	5268194	5268206	CT-TG	2	12	1	(CT)3-(TG)3	coding
Leptolyngbya boryana dg5	420	5300794	5300813	AG-CT	2	12	8	(AG)3-(CT)3	noncoding
Leptolyngbya boryana dg5	421	5303499	5303516	GAC-T	2	15	3	(GAC)3-(T)6	coding
Leptolyngbya boryana dg5	422	5330189	5330207	A-GT	2	12	7	(A)6-(GT)3	noncoding
Leptolyngbya boryana dg5	423	5355984	5355998	GAT-GA	2	15	0	(GAT)3-(GA)3	coding
Leptolyngbya boryana dg5	424	5388874	5388887	GA-T	2	12	2	(GA)3-(T)6	noncoding
Leptolyngbya boryana dg5	425	5394485	5394501	CT-A	2	13	4	(CT)3-(A)7	coding
Leptolyngbya boryana dg5	426	5397467	5397486	TC-T	2	12	8	(TC)3-(T)6	noncoding
Leptolyngbya boryana dg5	427	5406831	5406852	GC-T	2	12	10	(GC)3-(T)6	coding
Leptolyngbya boryana dg5	428	5415518	5415536	T-T	2	12	7	(T)6-(T)6	noncoding
Leptolyngbya boryana dg5	429	5422642	5422659	A-AG	2	12	6	(A)6-(AG)3	noncoding
Leptolyngbya boryana dg5	430	5424241	5424257	A-GC	2	13	4	(A)7-(GC)3	coding
Leptolyngbya boryana dg5	431	5430554	5430574	T-T	2	13	8	(T)7-(T)6	noncoding
Leptolyngbya boryana dg5	432	5435011	5435028	TTAA-T	2	18	0	(TTAA)3-(T)6	noncoding
Leptolyngbya boryana dg5	433	5436666	5436677	CT-AG	2	12	0	(CT)3-(AG)3	coding
Leptolyngbya boryana dg5	434	5446562	5446577	T-TC	2	13	3	(T)7-(TC)3	coding
Leptolyngbya boryana dg5	435	5448257	5448279	GC-TC	2	16	7	(GC)3-(TC)5	coding
Leptolyngbya boryana dg5	436	5465109	5465129	GC-CA	2	12	9	(GC)3-(CA)3	coding
Leptolyngbya boryana dg5	437	5481153	5481171	TCC-T	2	15	4	(TCC)3-(T)6	coding
Leptolyngbya boryana dg5	438	5487498	5487516	AG-T	2	12	7	(AG)3-(T)6	noncoding
Leptolyngbya boryana dg5	439	5495163	5495178	GT-T	2	12	4	(GT)3-(T)6	coding
Leptolyngbya boryana dg5	440	5496696	5496708	GA-T	2	12	1	(GA)3-(T)6	noncoding
Leptolyngbya boryana dg5	441	5543979	5544019	A-GA-T-A	4	24	17	(A)6-(GA)3-(T)6-(A)6	noncoding
Leptolyngbya boryana dg5	442	5553820	5553838	AT-A	2	13	6	(AT)3-(A)7	noncoding
Leptolyngbya boryana dg5	443	5585146	5585168	TC-GTC	2	15	8	(TC)3-(GTC)3	coding
Leptolyngbya boryana dg5	444	5603133	5603152	T-GA	2	12	8	(T)6-(GA)3	coding
Leptolyngbya boryana dg5	445	5617587	5617602	TA-CA	2	12	4	(TA)3-(CA)3	coding
Leptolyngbya boryana dg5	446	5638498	5638511	AG-AG	2	12	2	(AG)3-(AG)3	noncoding
Leptolyngbya boryana dg5	447	5639829	5639842	AG-GA	2	12	2	(AG)3-(GA)3	coding
Leptolyngbya boryana dg5	448	5644493	5644507	GC-A	2	12	3	(GC)3-(A)6	coding
Leptolyngbya boryana dg5	449	5682487	5682507	TC-GA	2	12	9	(TC)3-(GA)3	noncoding
Leptolyngbya boryana dg5	450	5687904	5687918	GA-A	2	12	3	(GA)3-(A)6	noncoding
Leptolyngbya boryana dg5	451	5690620	5690638	T-TCT	2	15	4	(T)6-(TCT)3	coding
Leptolyngbya boryana dg5	452	5717765	5717785	TGT-TG	2	15	6	(TGT)3-(TG)3	noncoding
Leptolyngbya boryana dg5	453	5731785	5731802	G-G	2	12	6	(G)6-(G)6	coding
Leptolyngbya boryana dg5	454	5738519	5738538	GA-T	2	12	8	(GA)3-(T)6	coding
Leptolyngbya boryana dg5	455	5746521	5746542	T-TC	2	12	10	(T)6-(TC)3	noncoding
Leptolyngbya boryana dg5	456	5748945	5748959	CT-GC	2	12	3	(CT)3-(GC)3	coding
Leptolyngbya boryana dg5	457	5758467	5758485	GA-T	2	12	7	(GA)3-(T)6	coding
Leptolyngbya boryana dg5	458	5759142	5759159	TC-TC	2	12	6	(TC)3-(TC)3	coding
Leptolyngbya boryana dg5	459	5800884	5800901	A-CG	2	12	6	(A)6-(CG)3	coding
Leptolyngbya boryana dg5	460	5823465	5823479	TC-CG	2	12	3	(TC)3-(CG)3	coding
Leptolyngbya boryana dg5	461	5828454	5828475	CTT-TCG	2	18	4	(CTT)3-(TCG)3	coding
Leptolyngbya boryana dg5	462	5834757	5834794	T-A-TC	3	20	18	(T)6-(A)8-(TC)3	coding
Leptolyngbya boryana dg5	463	5846368	5846379	CA-AG	2	12	0	(CA)3-(AG)3	coding
Leptolyngbya boryana dg5	464	5846470	5846487	T-AG	2	13	5	(T)7-(AG)3	noncoding
Leptolyngbya boryana dg5	465	5868017	5868031	TTG-GA	2	15	0	(TTG)3-(GA)3	noncoding
Leptolyngbya boryana dg5	466	5884287	5884308	GT-CT	2	12	10	(GT)3-(CT)3	coding
Leptolyngbya boryana dg5	467	5903209	5903230	CG-A	2	12	10	(CG)3-(A)6	coding
Leptolyngbya boryana dg5	468	5918601	5918621	GC-A	2	12	9	(GC)3-(A)6	coding
Leptolyngbya boryana dg5	469	5933015	5933030	AT-A	2	14	2	(AT)3-(A)8	noncoding
Leptolyngbya boryana dg5	470	5939457	5939474	AG-GT	2	14	4	(AG)3-(GT)4	noncoding
Leptolyngbya boryana dg5	471	5949139	5949164	CTG-GCA	2	18	8	(CTG)3-(GCA)3	coding
Leptolyngbya boryana dg5	472	5985213	5985227	T-TC	2	12	3	(T)6-(TC)3	noncoding
Leptolyngbya boryana dg5	473	6006357	6006386	CG-T-TC	3	19	11	(CG)3-(T)7-(TC)3	coding
Leptolyngbya boryana dg5	474	6008391	6008415	GCT-TA	2	15	10	(GCT)3-(TA)3	coding
Leptolyngbya boryana dg5	475	6008665	6008685	T-GTA	2	15	6	(T)6-(GTA)3	coding
Leptolyngbya boryana dg5	476	6034397	6034417	TC-T	2	12	9	(TC)3-(T)6	coding
Leptolyngbya boryana dg5	477	6086477	6086495	C-AG	2	14	5	(C)8-(AG)3	noncoding
Leptolyngbya boryana dg5	478	6090438	6090462	TGA-AG	2	15	10	(TGA)3-(AG)3	coding
Leptolyngbya boryana dg5	479	6113779	6113796	CA-CT	2	14	4	(CA)4-(CT)3	noncoding
Leptolyngbya boryana dg5	480	6134890	6134911	TC-TC	2	12	10	(TC)3-(TC)3	noncoding
Leptolyngbya boryana dg5	481	6147839	6147851	A-C	2	12	1	(A)6-(C)6	noncoding
Leptolyngbya boryana dg5	482	6149097	6149118	GC-A	2	12	10	(GC)3-(A)6	noncoding
Leptolyngbya boryana dg5	483	6156664	6156677	TA-GC	2	12	2	(TA)3-(GC)3	coding
Leptolyngbya boryana dg5	484	6158796	6158816	AG-AG	2	12	9	(AG)3-(AG)3	noncoding
Leptolyngbya boryana dg5	485	6158957	6158980	TACT-A	2	18	6	(TACT)3-(A)6	noncoding
Leptolyngbya sp. FACHB-239	1	37	55	A-GGA	2	15	4	(A)6-(GGA)3	noncoding
Leptolyngbya sp. FACHB-239	2	16079	16099	TG-GC	2	12	9	(TG)3-(GC)3	coding
Leptolyngbya sp. FACHB-239	3	32929	32951	GA-GC	2	16	7	(GA)5-(GC)3	coding
Leptolyngbya sp. FACHB-239	4	34631	34646	GA-A	2	13	3	(GA)3-(A)7	coding
Leptolyngbya sp. FACHB-239	5	44530	44542	TC-AG	2	12	1	(TC)3-(AG)3	coding
Leptolyngbya sp. FACHB-239	6	46180	46197	A-TTAA	2	18	0	(A)6-(TTAA)3	noncoding
Leptolyngbya sp. FACHB-239	7	50634	50654	A-A	2	13	8	(A)6-(A)7	noncoding
Leptolyngbya sp. FACHB-239	8	56951	56967	GC-T	2	13	4	(GC)3-(T)7	coding
Leptolyngbya sp. FACHB-239	9	58548	58566	TC-T	2	12	7	(TC)3-(T)6	noncoding
Leptolyngbya sp. FACHB-239	10	65672	65690	A-A	2	12	7	(A)6-(A)6	noncoding
Leptolyngbya sp. FACHB-239	11	74356	74377	A-GC	2	12	10	(A)6-(GC)3	coding
Leptolyngbya sp. FACHB-239	12	83722	83741	A-GA	2	12	8	(A)6-(GA)3	noncoding
Leptolyngbya sp. FACHB-239	13	86707	86722	T-GA	2	13	3	(T)7-(GA)3	coding
Leptolyngbya sp. FACHB-239	14	92321	92334	A-TC	2	12	2	(A)6-(TC)3	noncoding
Leptolyngbya sp. FACHB-239	15	125210	125224	TC-ATC	2	15	0	(TC)3-(ATC)3	coding
Leptolyngbya sp. FACHB-239	16	151001	151019	AC-T	2	12	7	(AC)3-(T)6	noncoding
Leptolyngbya sp. FACHB-239	17	177692	177709	A-GTC	2	15	3	(A)6-(GTC)3	coding
Leptolyngbya sp. FACHB-239	18	180395	180413	AG-TC	2	12	7	(AG)3-(TC)3	noncoding
Leptolyngbya sp. FACHB-239	19	213002	213014	CA-AG	2	12	1	(CA)3-(AG)3	coding
Leptolyngbya sp. FACHB-239	20	213795	213806	A-GT	2	12	0	(A)6-(GT)3	coding
Leptolyngbya sp. FACHB-239	21	223766	223793	CTT-TTC	2	24	4	(CTT)4-(TTC)4	coding
Leptolyngbya sp. FACHB-239	22	226916	226935	TG-TC	2	12	8	(TG)3-(TC)3	coding
Leptolyngbya sp. FACHB-239	23	236490	236508	TTGC-TG	2	18	1	(TTGC)3-(TG)3	coding
Leptolyngbya sp. FACHB-239	24	242878	242898	TC-CAA	2	15	6	(TC)3-(CAA)3	coding
Leptolyngbya sp. FACHB-239	25	244346	244363	TC-GCA	2	15	3	(TC)3-(GCA)3	coding
Leptolyngbya sp. FACHB-239	26	267465	267482	T-AG	2	12	6	(T)6-(AG)3	noncoding
Leptolyngbya sp. FACHB-239	27	278007	278027	A-AG	2	12	9	(A)6-(AG)3	coding
Leptolyngbya sp. FACHB-239	28	283475	283497	CA-A-CT	3	20	3	(CA)3-(A)6-(CT)4	coding
Leptolyngbya sp. FACHB-239	29	284141	284157	AG-AG	2	12	5	(AG)3-(AG)3	coding
Leptolyngbya sp. FACHB-239	30	293667	293687	GC-CAC	2	15	6	(GC)3-(CAC)3	coding
Leptolyngbya sp. FACHB-239	31	302143	302162	A-A	2	12	8	(A)6-(A)6	noncoding
Leptolyngbya sp. FACHB-239	32	315106	315129	T-TCC	2	16	8	(T)7-(TCC)3	coding
Leptolyngbya sp. FACHB-239	33	334458	334474	T-A	2	13	4	(T)6-(A)7	noncoding
Leptolyngbya sp. FACHB-239	34	380780	380793	AG-TC	2	14	0	(AG)3-(TC)4	noncoding
Leptolyngbya sp. FACHB-239	35	381672	381693	CT-T	2	12	10	(CT)3-(T)6	coding
Leptolyngbya sp. FACHB-239	36	388854	388869	T-GT	2	12	4	(T)6-(GT)3	coding
Leptolyngbya sp. FACHB-239	37	400515	400530	CA-A	2	12	4	(CA)3-(A)6	coding
Leptolyngbya sp. FACHB-239	38	436381	436396	AG-TC	2	12	4	(AG)3-(TC)3	coding
Leptolyngbya sp. FACHB-239	39	460843	460854	CT-TG	2	12	0	(CT)3-(TG)3	noncoding
Leptolyngbya sp. FACHB-239	40	466226	466247	AGC-AG	2	15	7	(AGC)3-(AG)3	coding
Leptolyngbya sp. FACHB-239	41	469999	470013	CT-AG	2	12	3	(CT)3-(AG)3	coding
Leptolyngbya sp. FACHB-239	42	477569	477590	AG-CA	2	12	10	(AG)3-(CA)3	noncoding
Leptolyngbya sp. FACHB-239	43	491414	491429	AG-TC	2	12	4	(AG)3-(TC)3	coding
Leptolyngbya sp. FACHB-239	44	500329	500344	T-AG	2	12	4	(T)6-(AG)3	coding
Leptolyngbya sp. FACHB-239	45	507349	507363	A-GA	2	14	1	(A)8-(GA)3	noncoding
Leptolyngbya sp. FACHB-239	46	512599	512612	T-T	2	12	2	(T)6-(T)6	noncoding
Leptolyngbya sp. FACHB-239	47	523091	523102	CA-AG	2	12	0	(CA)3-(AG)3	coding
Leptolyngbya sp. FACHB-239	48	529986	530007	CTG-CTG	2	18	4	(CTG)3-(CTG)3	coding
Leptolyngbya sp. FACHB-239	49	530669	530682	GC-T	2	12	2	(GC)3-(T)6	coding
Leptolyngbya sp. FACHB-239	50	545074	545090	A-G	2	12	5	(A)6-(G)6	coding
Leptolyngbya sp. FACHB-239	51	553758	553781	TC-AG-A	3	18	6	(TC)3-(AG)3-(A)6	noncoding
Leptolyngbya sp. FACHB-239	52	555278	555290	TG-TG	2	12	1	(TG)3-(TG)3	coding
Leptolyngbya sp. FACHB-239	53	557816	557846	T-T-A	3	19	12	(T)6-(T)7-(A)6	noncoding
Leptolyngbya sp. FACHB-239	54	561626	561643	GT-GC	2	12	6	(GT)3-(GC)3	coding
Leptolyngbya sp. FACHB-239	55	590567	590587	TC-AG	2	12	9	(TC)3-(AG)3	noncoding
Leptolyngbya sp. FACHB-239	56	595294	595306	TA-T	2	12	1	(TA)3-(T)6	noncoding
Leptolyngbya sp. FACHB-239	57	612758	612781	TC-GCA	2	15	9	(TC)3-(GCA)3	coding
Leptolyngbya sp. FACHB-239	58	671024	671043	TCG-GC	2	15	5	(TCG)3-(GC)3	coding
Leptolyngbya sp. FACHB-239	59	675629	675647	A-A	2	12	7	(A)6-(A)6	noncoding
Leptolyngbya sp. FACHB-239	60	692989	693005	AG-GT	2	12	5	(AG)3-(GT)3	coding
Leptolyngbya sp. FACHB-239	61	695849	695870	A-AT	2	12	10	(A)6-(AT)3	coding
Leptolyngbya sp. FACHB-239	62	702478	702498	A-CT	2	12	9	(A)6-(CT)3	coding
Leptolyngbya sp. FACHB-239	63	704412	704424	T-GA	2	12	1	(T)6-(GA)3	coding
Leptolyngbya sp. FACHB-239	64	718405	718421	A-A	2	12	5	(A)6-(A)6	noncoding
Leptolyngbya sp. FACHB-239	65	3441	3462	A-TCA	2	15	7	(A)6-(TCA)3	coding
Leptolyngbya sp. FACHB-239	66	3595	3622	TC-AT-T	3	19	9	(TC)3-(AT)3-(T)7	coding
Leptolyngbya sp. FACHB-239	67	41708	41722	AT-A	2	12	3	(AT)3-(A)6	noncoding
Leptolyngbya sp. FACHB-239	68	92916	92927	CG-GT	2	12	0	(CG)3-(GT)3	coding
Leptolyngbya sp. FACHB-239	69	93471	93490	GC-A	2	12	8	(GC)3-(A)6	coding
Leptolyngbya sp. FACHB-239	70	104201	104221	TG-TG	2	12	9	(TG)3-(TG)3	coding
Leptolyngbya sp. FACHB-239	71	112208	112227	CTT-GT	2	15	5	(CTT)3-(GT)3	coding
Leptolyngbya sp. FACHB-239	72	114277	114292	A-T	2	12	4	(A)6-(T)6	noncoding
Leptolyngbya sp. FACHB-239	73	172187	172209	TGA-CT	2	15	8	(TGA)3-(CT)3	coding
Leptolyngbya sp. FACHB-239	74	174775	174788	A-T	2	13	1	(A)7-(T)6	coding
Leptolyngbya sp. FACHB-239	75	177461	177483	A-A	2	13	10	(A)6-(A)7	noncoding
Leptolyngbya sp. FACHB-239	76	183386	183407	GA-TC-T	3	18	4	(GA)3-(TC)3-(T)6	noncoding
Leptolyngbya sp. FACHB-239	77	192269	192284	GCT-A	2	15	1	(GCT)3-(A)6	coding
Leptolyngbya sp. FACHB-239	78	204843	204862	A-T	2	13	7	(A)7-(T)6	coding
Leptolyngbya sp. FACHB-239	79	16523	16538	T-T	2	13	3	(T)7-(T)6	coding
Leptolyngbya sp. FACHB-239	80	37732	37748	TC-TC	2	12	5	(TC)3-(TC)3	noncoding
Leptolyngbya sp. FACHB-239	81	44138	44154	A-C	2	12	5	(A)6-(C)6	noncoding
Leptolyngbya sp. FACHB-239	82	49380	49398	CTG-T	2	15	4	(CTG)3-(T)6	noncoding
Leptolyngbya sp. FACHB-239	83	61625	61643	A-ATC	2	15	4	(A)6-(ATC)3	coding
Leptolyngbya sp. FACHB-239	84	72985	73001	AG-A	2	15	2	(AG)4-(A)7	coding
Leptolyngbya sp. FACHB-239	85	102816	102827	GC-T	2	12	0	(GC)3-(T)6	coding
Leptolyngbya sp. FACHB-239	86	117980	117998	CT-CG	2	12	7	(CT)3-(CG)3	coding
Leptolyngbya sp. FACHB-239	87	127163	127184	A-GC	2	14	8	(A)6-(GC)4	coding
Leptolyngbya sp. FACHB-239	88	167212	167234	A-T	2	13	10	(A)7-(T)6	noncoding
Leptolyngbya sp. FACHB-239	89	170572	170593	TC-GC	2	12	10	(TC)3-(GC)3	coding
Leptolyngbya sp. FACHB-239	90	176523	176537	T-G	2	12	3	(T)6-(G)6	coding
Leptolyngbya sp. FACHB-239	91	198071	198090	A-GC	2	12	8	(A)6-(GC)3	coding
Leptolyngbya sp. FACHB-239	92	9123	9141	T-T	2	12	7	(T)6-(T)6	noncoding
Leptolyngbya sp. FACHB-239	93	15758	15773	TC-T	2	13	3	(TC)3-(T)7	coding
Leptolyngbya sp. FACHB-239	94	25417	25429	GC-AT	2	12	1	(GC)3-(AT)3	noncoding
Leptolyngbya sp. FACHB-239	95	42134	42163	CG-GA-GA	3	20	10	(CG)3-(GA)3-(GA)4	noncoding
Leptolyngbya sp. FACHB-239	96	46933	46953	G-CG	2	12	9	(G)6-(CG)3	coding
Leptolyngbya sp. FACHB-239	97	58225	58246	C-GT	2	12	10	(C)6-(GT)3	coding
Leptolyngbya sp. FACHB-239	98	66978	66994	T-T	2	13	4	(T)7-(T)6	coding
Leptolyngbya sp. FACHB-239	99	69654	69675	TA-A	2	15	7	(TA)4-(A)7	noncoding
Leptolyngbya sp. FACHB-239	100	77415	77434	CT-CT	2	14	6	(CT)4-(CT)3	noncoding
Leptolyngbya sp. FACHB-239	101	83716	83730	T-T	2	12	3	(T)6-(T)6	noncoding
Leptolyngbya sp. FACHB-239	102	87054	87069	GA-AG	2	12	4	(GA)3-(AG)3	noncoding
Leptolyngbya sp. FACHB-239	103	104731	104745	A-A	2	12	3	(A)6-(A)6	noncoding
Leptolyngbya sp. FACHB-239	104	117138	117152	AG-TC	2	14	1	(AG)4-(TC)3	coding
Leptolyngbya sp. FACHB-239	105	134736	134752	A-GA	2	12	5	(A)6-(GA)3	coding
Leptolyngbya sp. FACHB-239	106	151259	151277	A-T	2	12	7	(A)6-(T)6	coding
Leptolyngbya sp. FACHB-239	107	178967	178985	GA-A	2	12	7	(GA)3-(A)6	coding
Leptolyngbya sp. FACHB-239	108	186956	186975	A-A	2	12	8	(A)6-(A)6	noncoding
Leptolyngbya sp. FACHB-239	109	197138	197149	TC-A	2	12	0	(TC)3-(A)6	noncoding
Leptolyngbya sp. FACHB-239	110	6004	6019	CT-CT	2	12	4	(CT)3-(CT)3	coding
Leptolyngbya sp. FACHB-239	111	13544	13573	A-GA-CT	3	18	12	(A)6-(GA)3-(CT)3	coding
Leptolyngbya sp. FACHB-239	112	16995	17016	CG-AC	2	12	10	(CG)3-(AC)3	coding
Leptolyngbya sp. FACHB-239	113	22722	22740	TCT-CA	2	15	4	(TCT)3-(CA)3	noncoding
Leptolyngbya sp. FACHB-239	114	23257	23271	AT-AT	2	12	3	(AT)3-(AT)3	noncoding
Leptolyngbya sp. FACHB-239	115	23828	23848	GCT-GA	2	15	6	(GCT)3-(GA)3	coding
Leptolyngbya sp. FACHB-239	116	47012	47036	GAA-CT	2	15	10	(GAA)3-(CT)3	coding
Leptolyngbya sp. FACHB-239	117	61770	61781	TG-AC	2	12	0	(TG)3-(AC)3	noncoding
Leptolyngbya sp. FACHB-239	118	66998	67010	GT-A	2	12	1	(GT)3-(A)6	noncoding
Leptolyngbya sp. FACHB-239	119	67253	67278	CA-GCA	2	17	9	(CA)4-(GCA)3	noncoding
Leptolyngbya sp. FACHB-239	120	71608	71635	TA-TA-TA	3	20	8	(TA)3-(TA)4-(TA)3	noncoding
Leptolyngbya sp. FACHB-239	121	73795	73811	GA-TC	2	12	5	(GA)3-(TC)3	coding
Leptolyngbya sp. FACHB-239	122	75814	75834	AG-TC	2	12	9	(AG)3-(TC)3	coding
Leptolyngbya sp. FACHB-239	123	78195	78216	AATG-AC	2	18	4	(AATG)3-(AC)3	noncoding
Leptolyngbya sp. FACHB-239	124	79455	79470	A-CT	2	12	4	(A)6-(CT)3	noncoding
Leptolyngbya sp. FACHB-239	125	79482	79500	CG-T	2	12	7	(CG)3-(T)6	noncoding
Leptolyngbya sp. FACHB-239	126	85229	85244	T-C	2	14	2	(T)6-(C)8	coding
Leptolyngbya sp. FACHB-239	127	92965	92986	TG-TTC	2	15	7	(TG)3-(TTC)3	coding
Leptolyngbya sp. FACHB-239	128	98910	98931	T-AG	2	12	10	(T)6-(AG)3	coding
Leptolyngbya sp. FACHB-239	129	101165	101183	GC-T	2	12	7	(GC)3-(T)6	noncoding
Leptolyngbya sp. FACHB-239	130	134687	134703	AC-CG	2	12	5	(AC)3-(CG)3	noncoding
Leptolyngbya sp. FACHB-239	131	149834	149850	CT-A	2	12	5	(CT)3-(A)6	noncoding
Leptolyngbya sp. FACHB-239	132	150895	150911	T-TC	2	12	5	(T)6-(TC)3	noncoding
Leptolyngbya sp. FACHB-239	133	156590	156603	A-CT	2	12	2	(A)6-(CT)3	noncoding
Leptolyngbya sp. FACHB-239	134	181170	181196	GGC-GAA	2	18	9	(GGC)3-(GAA)3	coding
Leptolyngbya sp. FACHB-239	135	39	53	T-TC	2	12	3	(T)6-(TC)3	noncoding
Leptolyngbya sp. FACHB-239	136	1834	1848	T-A	2	14	1	(T)6-(A)8	noncoding
Leptolyngbya sp. FACHB-239	137	2246	2260	TG-CG	2	12	3	(TG)3-(CG)3	coding
Leptolyngbya sp. FACHB-239	138	17890	17907	GA-T	2	12	6	(GA)3-(T)6	coding
Leptolyngbya sp. FACHB-239	139	30917	30940	CTG-CAA	2	18	6	(CTG)3-(CAA)3	coding
Leptolyngbya sp. FACHB-239	140	50701	50716	GT-A	2	13	3	(GT)3-(A)7	noncoding
Leptolyngbya sp. FACHB-239	141	57508	57525	A-A	2	12	6	(A)6-(A)6	coding
Leptolyngbya sp. FACHB-239	142	61617	61636	A-CG	2	12	8	(A)6-(CG)3	coding
Leptolyngbya sp. FACHB-239	143	79347	79367	A-T	2	12	9	(A)6-(T)6	coding
Leptolyngbya sp. FACHB-239	144	84803	84835	T-C-C	3	18	15	(T)6-(C)6-(C)6	noncoding
Leptolyngbya sp. FACHB-239	145	85808	85826	CG-ATT	2	15	4	(CG)3-(ATT)3	coding
Leptolyngbya sp. FACHB-239	146	89841	89857	C-C	2	12	5	(C)6-(C)6	noncoding
Leptolyngbya sp. FACHB-239	147	90475	90496	GA-T	2	12	10	(GA)3-(T)6	noncoding
Leptolyngbya sp. FACHB-239	148	109970	109982	CT-T	2	12	1	(CT)3-(T)6	noncoding
Leptolyngbya sp. FACHB-239	149	140180	140200	A-AG	2	12	9	(A)6-(AG)3	noncoding
Leptolyngbya sp. FACHB-239	150	144660	144672	GC-AG	2	12	1	(GC)3-(AG)3	coding
Leptolyngbya sp. FACHB-239	151	146274	146295	TG-AG	2	14	8	(TG)3-(AG)4	noncoding
Leptolyngbya sp. FACHB-239	152	165992	166014	TTCC-G	2	18	5	(TTCC)3-(G)6	noncoding
Leptolyngbya sp. FACHB-239	153	179540	179557	TC-A	2	12	6	(TC)3-(A)6	noncoding
Leptolyngbya sp. FACHB-239	154	585	596	GT-CT	2	12	0	(GT)3-(CT)3	coding
Leptolyngbya sp. FACHB-239	155	1426	1445	A-GC	2	13	7	(A)7-(GC)3	coding
Leptolyngbya sp. FACHB-239	156	4449	4470	CG-GT	2	14	8	(CG)4-(GT)3	coding
Leptolyngbya sp. FACHB-239	157	79679	79701	TGA-A	2	18	5	(TGA)4-(A)6	coding
Leptolyngbya sp. FACHB-239	158	82493	82509	A-CT	2	14	3	(A)8-(CT)3	coding
Leptolyngbya sp. FACHB-239	159	90327	90339	A-CT	2	12	1	(A)6-(CT)3	noncoding
Leptolyngbya sp. FACHB-239	160	107583	107603	A-A	2	13	8	(A)7-(A)6	noncoding
Leptolyngbya sp. FACHB-239	161	109289	109303	T-A	2	12	3	(T)6-(A)6	noncoding
Leptolyngbya sp. FACHB-239	162	147317	147341	T-TGC	2	15	10	(T)6-(TGC)3	coding
Leptolyngbya sp. FACHB-239	163	154901	154912	GA-AG	2	12	0	(GA)3-(AG)3	coding
Leptolyngbya sp. FACHB-239	164	154991	155002	GA-AG	2	12	0	(GA)3-(AG)3	coding
Leptolyngbya sp. FACHB-239	165	155081	155092	GA-AG	2	12	0	(GA)3-(AG)3	coding
Leptolyngbya sp. FACHB-239	166	166167	166184	G-CG	2	12	6	(G)6-(CG)3	coding
Leptolyngbya sp. FACHB-239	167	169601	169612	T-GT	2	12	0	(T)6-(GT)3	noncoding
Leptolyngbya sp. FACHB-239	168	172002	172021	GA-A	2	12	8	(GA)3-(A)6	noncoding
Leptolyngbya sp. FACHB-239	169	178178	178189	T-CT	2	12	0	(T)6-(CT)3	noncoding
Leptolyngbya sp. FACHB-239	170	182279	182293	GA-A	2	12	3	(GA)3-(A)6	noncoding
Leptolyngbya sp. FACHB-239	171	10953	10965	T-GA	2	12	1	(T)6-(GA)3	coding
Leptolyngbya sp. FACHB-239	172	14162	14185	GT-CT	2	14	10	(GT)3-(CT)4	coding
Leptolyngbya sp. FACHB-239	173	15912	15929	GAA-A	2	15	3	(GAA)3-(A)6	coding
Leptolyngbya sp. FACHB-239	174	79900	79926	ATG-ACG	2	18	9	(ATG)3-(ACG)3	coding
Leptolyngbya sp. FACHB-239	175	100259	100277	GTG-CAG	2	18	1	(GTG)3-(CAG)3	coding
Leptolyngbya sp. FACHB-239	176	117126	117149	A-AAG	2	15	9	(A)6-(AAG)3	coding
Leptolyngbya sp. FACHB-239	177	10006	10017	CA-AG	2	12	0	(CA)3-(AG)3	coding
Leptolyngbya sp. FACHB-239	178	10108	10125	T-AG	2	13	5	(T)7-(AG)3	noncoding
Leptolyngbya sp. FACHB-239	179	31655	31669	TTG-GA	2	15	0	(TTG)3-(GA)3	noncoding
Leptolyngbya sp. FACHB-239	180	47925	47946	GT-CT	2	12	10	(GT)3-(CT)3	coding
Leptolyngbya sp. FACHB-239	181	66847	66868	CG-A	2	12	10	(CG)3-(A)6	coding
Leptolyngbya sp. FACHB-239	182	82239	82259	GC-A	2	12	9	(GC)3-(A)6	coding
Leptolyngbya sp. FACHB-239	183	96653	96668	AT-A	2	14	2	(AT)3-(A)8	noncoding
Leptolyngbya sp. FACHB-239	184	103095	103112	AG-GT	2	14	4	(AG)3-(GT)4	coding
Leptolyngbya sp. FACHB-239	185	112777	112802	CTG-GCA	2	18	8	(CTG)3-(GCA)3	coding
Leptolyngbya sp. FACHB-239	186	13911	13943	A-AC-AT	3	20	13	(A)6-(AC)3-(AT)4	noncoding
Leptolyngbya sp. FACHB-239	187	19349	19369	T-CG	2	12	9	(T)6-(CG)3	coding
Leptolyngbya sp. FACHB-239	188	43913	43936	GC-TG	2	14	10	(GC)4-(TG)3	coding
Leptolyngbya sp. FACHB-239	189	83121	83134	A-GC	2	12	2	(A)6-(GC)3	coding
Leptolyngbya sp. FACHB-239	190	97735	97757	GCA-GA	2	17	6	(GCA)3-(GA)4	coding
Leptolyngbya sp. FACHB-239	191	27483	27496	CG-CT	2	12	2	(CG)3-(CT)3	noncoding
Leptolyngbya sp. FACHB-239	192	61242	61256	A-C	2	13	2	(A)7-(C)6	coding
Leptolyngbya sp. FACHB-239	193	64383	64403	CT-A	2	12	9	(CT)3-(A)6	coding
Leptolyngbya sp. FACHB-239	194	66078	66110	TC-CG-AT	3	18	15	(TC)3-(CG)3-(AT)3	coding
Leptolyngbya sp. FACHB-239	195	71291	71309	A-CT	2	12	7	(A)6-(CT)3	noncoding
Leptolyngbya sp. FACHB-239	196	85167	85184	A-AG	2	12	6	(A)6-(AG)3	noncoding
Leptolyngbya sp. FACHB-239	197	94981	94998	A-CG	2	12	6	(A)6-(CG)3	coding
Leptolyngbya sp. FACHB-239	198	102331	102345	CT-TC	2	12	3	(CT)3-(TC)3	coding
Leptolyngbya sp. FACHB-239	199	109069	109081	A-TC	2	12	1	(A)6-(TC)3	coding
Leptolyngbya sp. FACHB-239	200	120883	120903	TC-T	2	12	9	(TC)3-(T)6	noncoding
Leptolyngbya sp. FACHB-239	201	1347	1361	AG-CT	2	12	3	(AG)3-(CT)3	coding
Leptolyngbya sp. FACHB-239	202	3189	3210	A-AC	2	12	10	(A)6-(AC)3	coding
Leptolyngbya sp. FACHB-239	203	61286	61299	A-C	2	12	2	(A)6-(C)6	coding
Leptolyngbya sp. FACHB-239	204	67668	67686	CT-A	2	12	7	(CT)3-(A)6	coding
Leptolyngbya sp. FACHB-239	205	76785	76802	A-GGC	2	16	2	(A)7-(GGC)3	coding
Leptolyngbya sp. FACHB-239	206	96520	96542	GTT-GA	2	15	8	(GTT)3-(GA)3	coding
Leptolyngbya sp. FACHB-239	207	107246	107259	T-AC	2	13	1	(T)7-(AC)3	coding
Leptolyngbya sp. FACHB-239	208	109040	109052	AG-A	2	12	1	(AG)3-(A)6	noncoding
Leptolyngbya sp. FACHB-239	209	126566	126585	A-GT	2	12	8	(A)6-(GT)3	coding
Leptolyngbya sp. FACHB-239	210	172342	172363	AG-GA	2	12	10	(AG)3-(GA)3	noncoding
Leptolyngbya sp. FACHB-239	211	175198	175215	T-TGC	2	16	2	(T)7-(TGC)3	coding
Leptolyngbya sp. FACHB-239	212	186689	186707	T-TC	2	12	7	(T)6-(TC)3	noncoding
Leptolyngbya sp. FACHB-239	213	194838	194859	CT-T	2	12	10	(CT)3-(T)6	coding
Leptolyngbya sp. FACHB-239	214	204189	204201	AG-TC	2	12	1	(AG)3-(TC)3	coding
Leptolyngbya sp. FACHB-239	215	215047	215061	T-A	2	12	3	(T)6-(A)6	coding
Leptolyngbya sp. FACHB-239	216	236022	236038	TG-G	2	12	5	(TG)3-(G)6	coding
Leptolyngbya sp. FACHB-239	217	238379	238399	CG-AC	2	14	7	(CG)4-(AC)3	coding
Leptolyngbya sp. FACHB-239	218	251169	251191	CG-CTG	2	15	8	(CG)3-(CTG)3	coding
Leptolyngbya sp. FACHB-239	219	271964	271979	GC-CT	2	12	4	(GC)3-(CT)3	coding
Leptolyngbya sp. FACHB-239	220	291906	291921	T-A	2	12	4	(T)6-(A)6	noncoding
Leptolyngbya sp. FACHB-239	221	329633	329651	GA-CAT	2	15	4	(GA)3-(CAT)3	coding
Leptolyngbya sp. FACHB-239	222	351398	351419	A-A	2	15	7	(A)6-(A)9	noncoding
Leptolyngbya sp. FACHB-239	223	357509	357524	GA-AT	2	12	4	(GA)3-(AT)3	coding
Leptolyngbya sp. FACHB-239	224	378414	378428	AG-T	2	12	3	(AG)3-(T)6	coding
Leptolyngbya sp. FACHB-239	225	391749	391769	TTG-TTG	2	18	3	(TTG)3-(TTG)3	coding
Leptolyngbya sp. FACHB-239	226	400266	400283	CG-CT	2	12	6	(CG)3-(CT)3	coding
Leptolyngbya sp. FACHB-239	227	403354	403376	GT-CAA	2	15	8	(GT)3-(CAA)3	coding
Leptolyngbya sp. FACHB-239	228	427211	427262	AC-AC-AC-AC-AC	5	40	12	(AC)4-(AC)4-(AC)4-(AC)4-(AC)4	noncoding
Leptolyngbya sp. FACHB-239	229	430433	430451	C-TC	2	12	7	(C)6-(TC)3	coding
Leptolyngbya sp. FACHB-239	230	433875	433896	G-C	2	17	5	(G)8-(C)9	noncoding
Leptolyngbya sp. FACHB-239	231	445968	445984	TC-CT	2	12	5	(TC)3-(CT)3	coding
Leptolyngbya sp. FACHB-239	232	469573	469590	C-G	2	12	6	(C)6-(G)6	noncoding
Leptolyngbya sp. FACHB-239	233	10937	10960	CGA-GA	2	15	9	(CGA)3-(GA)3	coding
Leptolyngbya sp. FACHB-239	234	42268	42286	T-AT	2	13	6	(T)7-(AT)3	noncoding
Leptolyngbya sp. FACHB-239	235	45511	45532	GC-AG	2	12	10	(GC)3-(AG)3	coding
Leptolyngbya sp. FACHB-239	236	52087	52127	T-A-TC-T	4	24	17	(T)6-(A)6-(TC)3-(T)6	noncoding
Leptolyngbya sp. FACHB-239	237	99398	99410	A-TC	2	12	1	(A)6-(TC)3	noncoding
Leptolyngbya sp. FACHB-239	238	100928	100943	A-AC	2	12	4	(A)6-(AC)3	coding
Leptolyngbya sp. FACHB-239	239	108590	108608	A-CT	2	12	7	(A)6-(CT)3	noncoding
Leptolyngbya sp. FACHB-239	240	337	361	A-ATG	2	15	10	(A)6-(ATG)3	noncoding
Leptolyngbya sp. FACHB-239	241	6703	6722	CAA-GA	2	15	5	(CAA)3-(GA)3	coding
Leptolyngbya sp. FACHB-239	242	21936	21955	GT-T	2	13	7	(GT)3-(T)7	noncoding
Leptolyngbya sp. FACHB-239	243	38090	38102	CG-T	2	12	1	(CG)3-(T)6	noncoding
Leptolyngbya sp. FACHB-239	244	46880	46896	A-TG	2	13	4	(A)7-(TG)3	noncoding
Leptolyngbya sp. FACHB-239	245	57852	57871	A-AG	2	12	8	(A)6-(AG)3	noncoding
Leptolyngbya sp. FACHB-239	246	79697	79712	TC-AG	2	14	2	(TC)3-(AG)4	coding
Leptolyngbya sp. FACHB-239	247	87079	87098	A-TG	2	12	8	(A)6-(TG)3	noncoding
Leptolyngbya sp. FACHB-239	248	93255	93270	T-TC	2	12	4	(T)6-(TC)3	coding
Leptolyngbya sp. FACHB-239	249	1607	1625	T-TCT	2	15	4	(T)6-(TCT)3	coding
Leptolyngbya sp. FACHB-239	250	28752	28772	TGT-TG	2	15	6	(TGT)3-(TG)3	noncoding
Leptolyngbya sp. FACHB-239	251	42772	42789	G-G	2	12	6	(G)6-(G)6	coding
Leptolyngbya sp. FACHB-239	252	49506	49525	GA-T	2	12	8	(GA)3-(T)6	coding
Leptolyngbya sp. FACHB-239	253	57508	57529	T-TC	2	12	10	(T)6-(TC)3	noncoding
Leptolyngbya sp. FACHB-239	254	59932	59946	CT-GC	2	12	3	(CT)3-(GC)3	coding
Leptolyngbya sp. FACHB-239	255	69454	69472	GA-T	2	12	7	(GA)3-(T)6	coding
Leptolyngbya sp. FACHB-239	256	70129	70146	TC-TC	2	12	6	(TC)3-(TC)3	coding
Leptolyngbya sp. FACHB-239	257	6724	6741	A-CG	2	12	6	(A)6-(CG)3	coding
Leptolyngbya sp. FACHB-239	258	19887	19903	T-A	2	12	5	(T)6-(A)6	coding
Leptolyngbya sp. FACHB-239	259	20511	20527	CT-A	2	12	5	(CT)3-(A)6	coding
Leptolyngbya sp. FACHB-239	260	22287	22300	GA-GC	2	12	2	(GA)3-(GC)3	coding
Leptolyngbya sp. FACHB-239	261	47273	47286	T-C	2	12	2	(T)6-(C)6	coding
Leptolyngbya sp. FACHB-239	262	72995	73014	CTG-TC	2	15	5	(CTG)3-(TC)3	coding
Leptolyngbya sp. FACHB-239	263	21770	21791	AAG-AG	2	15	7	(AAG)3-(AG)3	coding
Leptolyngbya sp. FACHB-239	264	22330	22348	TG-T	2	12	7	(TG)3-(T)6	coding
Leptolyngbya sp. FACHB-239	265	25266	25287	CG-A	2	12	10	(CG)3-(A)6	coding
Leptolyngbya sp. FACHB-239	266	26383	26402	A-A	2	12	8	(A)6-(A)6	noncoding
Leptolyngbya sp. FACHB-239	267	32053	32072	GA-T	2	12	8	(GA)3-(T)6	coding
Leptolyngbya sp. FACHB-239	268	40522	40539	T-TC	2	13	5	(T)7-(TC)3	coding
Leptolyngbya sp. FACHB-239	269	63243	63260	TC-GA	2	14	4	(TC)4-(GA)3	noncoding
Leptolyngbya sp. FACHB-239	270	63283	63298	T-T	2	12	4	(T)6-(T)6	noncoding
Leptolyngbya sp. FACHB-239	271	65359	65377	AG-CA	2	12	7	(AG)3-(CA)3	coding
Leptolyngbya sp. FACHB-239	272	73847	73859	CA-GA	2	12	1	(CA)3-(GA)3	coding
Leptolyngbya sp. FACHB-239	273	83502	83523	TC-CT	2	12	10	(TC)3-(CT)3	coding
Leptolyngbya sp. FACHB-239	274	32	52	C-C	2	12	9	(C)6-(C)6	coding
Leptolyngbya sp. FACHB-239	275	2621	2642	CA-A	2	12	10	(CA)3-(A)6	noncoding
Leptolyngbya sp. FACHB-239	276	20747	20760	T-TC	2	12	2	(T)6-(TC)3	coding
Leptolyngbya sp. FACHB-239	277	24769	24790	T-T	2	12	10	(T)6-(T)6	coding
Leptolyngbya sp. FACHB-239	278	37968	37989	TA-AT	2	12	10	(TA)3-(AT)3	coding
Leptolyngbya sp. FACHB-239	279	54618	54630	A-CA	2	12	1	(A)6-(CA)3	coding
Leptolyngbya sp. FACHB-239	280	59819	59837	T-A	2	13	6	(T)6-(A)7	coding
Leptolyngbya sp. FACHB-239	281	81167	81189	TCT-AG	2	15	8	(TCT)3-(AG)3	coding
Leptolyngbya sp. FACHB-239	282	83266	83285	GA-A	2	12	8	(GA)3-(A)6	noncoding
Leptolyngbya sp. FACHB-239	283	39	53	T-TC	2	12	3	(T)6-(TC)3	noncoding
Leptolyngbya sp. FACHB-239	284	42599	42617	TG-A	2	13	6	(TG)3-(A)7	noncoding
Leptolyngbya sp. FACHB-239	285	52382	52396	T-T	2	12	3	(T)6-(T)6	coding
Leptolyngbya sp. FACHB-239	286	60862	60879	CAT-CCA	2	18	0	(CAT)3-(CCA)3	coding
Leptolyngbya sp. FACHB-239	287	66390	66402	T-G	2	12	1	(T)6-(G)6	coding
Leptolyngbya sp. FACHB-239	288	77753	77770	CT-C	2	12	6	(CT)3-(C)6	coding
Leptolyngbya sp. FACHB-239	289	83253	83264	T-CG	2	12	0	(T)6-(CG)3	coding
Leptolyngbya sp. FACHB-239	290	87751	87765	GA-A	2	12	3	(GA)3-(A)6	noncoding
Leptolyngbya sp. FACHB-239	291	28223	28243	C-GA	2	12	9	(C)6-(GA)3	coding
Leptolyngbya sp. FACHB-239	292	37517	37533	TC-GC	2	14	3	(TC)3-(GC)4	coding
Leptolyngbya sp. FACHB-239	293	45687	45702	C-TC	2	14	2	(C)8-(TC)3	coding
Leptolyngbya sp. FACHB-239	294	70783	70796	T-TA	2	12	2	(T)6-(TA)3	noncoding
Leptolyngbya sp. FACHB-239	295	3893	3914	A-GT	2	12	10	(A)6-(GT)3	noncoding
Leptolyngbya sp. FACHB-239	296	21403	21415	T-A	2	12	1	(T)6-(A)6	noncoding
Leptolyngbya sp. FACHB-239	297	34457	34468	TC-T	2	12	0	(TC)3-(T)6	coding
Leptolyngbya sp. FACHB-239	298	63316	63332	CG-A	2	14	3	(CG)4-(A)6	coding
Leptolyngbya sp. FACHB-239	299	23302	23318	T-A	2	12	5	(T)6-(A)6	noncoding
Leptolyngbya sp. FACHB-239	300	59247	59268	AG-AT	2	12	10	(AG)3-(AT)3	coding
Leptolyngbya sp. FACHB-239	301	77412	77426	GA-A	2	12	3	(GA)3-(A)6	noncoding
Leptolyngbya sp. FACHB-239	302	325	337	AT-CA	2	12	1	(AT)3-(CA)3	noncoding
Leptolyngbya sp. FACHB-239	303	50516	50532	GCA-AG	2	15	2	(GCA)3-(AG)3	coding
Leptolyngbya sp. FACHB-239	304	92563	92583	T-AT	2	12	9	(T)6-(AT)3	coding
Leptolyngbya sp. FACHB-239	305	101251	101268	CT-CTG	2	15	3	(CT)3-(CTG)3	coding
Leptolyngbya sp. FACHB-239	306	127040	127068	TG-GA-T	3	18	11	(TG)3-(GA)3-(T)6	noncoding
Leptolyngbya sp. FACHB-239	307	134883	134905	ATG-A	2	15	8	(ATG)3-(A)6	coding
Leptolyngbya sp. FACHB-239	308	140353	140367	T-T	2	12	3	(T)6-(T)6	noncoding
Leptolyngbya sp. FACHB-239	309	149250	149265	GCA-T	2	15	1	(GCA)3-(T)6	coding
Leptolyngbya sp. FACHB-239	310	166502	166517	T-ATT	2	15	1	(T)6-(ATT)3	noncoding
Leptolyngbya sp. FACHB-239	311	167640	167656	T-T	2	12	5	(T)6-(T)6	noncoding
Leptolyngbya sp. FACHB-239	312	197687	197706	TGC-GCT	2	18	2	(TGC)3-(GCT)3	coding
Leptolyngbya sp. FACHB-239	313	230037	230063	T-A-A	3	19	8	(T)6-(A)7-(A)6	noncoding
Leptolyngbya sp. FACHB-239	314	245853	245879	GGC-CCT	2	18	9	(GGC)3-(CCT)3	coding
Leptolyngbya sp. FACHB-239	315	266088	266109	GC-T	2	12	10	(GC)3-(T)6	noncoding
Leptolyngbya sp. FACHB-239	316	277768	277784	GA-T	2	12	5	(GA)3-(T)6	coding
Leptolyngbya sp. FACHB-239	317	278752	278763	CT-T	2	12	0	(CT)3-(T)6	noncoding
Leptolyngbya sp. FACHB-239	318	299293	299315	T-T	2	15	8	(T)6-(T)9	noncoding
Leptolyngbya sp. FACHB-239	319	303669	303680	G-A	2	12	0	(G)6-(A)6	coding
Leptolyngbya sp. FACHB-239	320	322213	322230	A-AT	2	12	6	(A)6-(AT)3	coding
Leptolyngbya sp. FACHB-239	321	371544	371564	T-TC	2	15	6	(T)7-(TC)4	coding
Leptolyngbya sp. FACHB-239	322	4004	4022	T-T	2	12	7	(T)6-(T)6	coding
Leptolyngbya sp. FACHB-239	323	4814	4842	CT-G-G	3	18	11	(CT)3-(G)6-(G)6	coding
Leptolyngbya sp. FACHB-239	324	22388	22415	ATCA-AC	2	18	10	(ATCA)3-(AC)3	coding
Leptolyngbya sp. FACHB-239	325	33719	33738	CTT-C	2	15	5	(CTT)3-(C)6	coding
Leptolyngbya sp. FACHB-239	326	35367	35387	GC-AG-TC	3	18	3	(GC)3-(AG)3-(TC)3	coding
Leptolyngbya sp. FACHB-239	327	46800	46814	CG-TAA	2	15	0	(CG)3-(TAA)3	coding
Leptolyngbya sp. FACHB-239	328	75805	75817	TG-AT	2	12	1	(TG)3-(AT)3	noncoding
Leptolyngbya sp. FACHB-239	329	6397	6416	T-GA	2	12	8	(T)6-(GA)3	coding
Leptolyngbya sp. FACHB-239	330	20851	20866	TA-CA	2	12	4	(TA)3-(CA)3	coding
Leptolyngbya sp. FACHB-239	331	41762	41775	AG-AG	2	12	2	(AG)3-(AG)3	noncoding
Leptolyngbya sp. FACHB-239	332	43093	43106	AG-GA	2	12	2	(AG)3-(GA)3	coding
Leptolyngbya sp. FACHB-239	333	47757	47771	GC-A	2	12	3	(GC)3-(A)6	coding
Leptolyngbya sp. FACHB-239	334	2074	2087	GA-T	2	12	2	(GA)3-(T)6	coding
Leptolyngbya sp. FACHB-239	335	33271	33298	GCGTT-GA	2	21	7	(GCGTT)3-(GA)3	coding
Leptolyngbya sp. FACHB-239	336	35292	35303	T-CG	2	12	0	(T)6-(CG)3	coding
Leptolyngbya sp. FACHB-239	337	46213	46227	GA-GC	2	12	3	(GA)3-(GC)3	coding
Leptolyngbya sp. FACHB-239	338	55679	55693	C-AC	2	12	3	(C)6-(AC)3	coding
Leptolyngbya sp. FACHB-239	339	23518	23539	TC-CT	2	12	10	(TC)3-(CT)3	coding
Leptolyngbya sp. FACHB-239	340	49336	49357	TA-TC	2	12	10	(TA)3-(TC)3	noncoding
Leptolyngbya sp. FACHB-239	341	56782	56794	TG-A	2	12	1	(TG)3-(A)6	noncoding
Leptolyngbya sp. FACHB-239	342	3359	3375	TC-A	2	12	5	(TC)3-(A)6	noncoding
Leptolyngbya sp. FACHB-239	343	4067	4086	T-AT	2	12	8	(T)6-(AT)3	coding
Leptolyngbya sp. FACHB-239	344	7687	7707	TCA-T	2	15	6	(TCA)3-(T)6	noncoding
Leptolyngbya sp. FACHB-239	345	7811	7824	GA-TC	2	12	2	(GA)3-(TC)3	noncoding
Leptolyngbya sp. FACHB-239	346	21181	21194	AG-GA	2	12	2	(AG)3-(GA)3	coding
Leptolyngbya sp. FACHB-239	347	30396	30408	T-A	2	12	1	(T)6-(A)6	noncoding
Leptolyngbya sp. FACHB-239	348	47013	47029	T-AT	2	13	4	(T)7-(AT)3	noncoding
Leptolyngbya sp. FACHB-239	349	54604	54632	C-C-C	3	19	10	(C)6-(C)7-(C)6	coding
Leptolyngbya sp. FACHB-239	350	5794	5812	C-AG	2	14	5	(C)8-(AG)3	noncoding
Leptolyngbya sp. FACHB-239	351	9755	9779	TGA-AG	2	15	10	(TGA)3-(AG)3	coding
Leptolyngbya sp. FACHB-239	352	33096	33113	CA-CT	2	14	4	(CA)4-(CT)3	noncoding
Leptolyngbya sp. FACHB-239	353	45997	46015	T-GT	2	12	7	(T)6-(GT)3	coding
Leptolyngbya sp. FACHB-239	354	48427	48446	T-GA	2	12	8	(T)6-(GA)3	noncoding
Leptolyngbya sp. FACHB-239	355	502	539	GA-T-A	3	20	18	(GA)3-(T)8-(A)6	noncoding
Leptolyngbya sp. FACHB-239	356	6821	6842	CGA-AAG	2	18	4	(CGA)3-(AAG)3	coding
Leptolyngbya sp. FACHB-239	357	11817	11830	CG-AG	2	12	2	(CG)3-(AG)3	coding
Leptolyngbya sp. FACHB-239	358	34395	34412	CG-T	2	12	6	(CG)3-(T)6	coding
Leptolyngbya sp. FACHB-239	359	37215	37232	CT-TCCT	2	18	0	(CT)3-(TCCT)3	coding
Leptolyngbya sp. FACHB-239	360	6609	6629	AAC-ATA	2	18	3	(AAC)3-(ATA)3	coding
Leptolyngbya sp. FACHB-239	361	10931	10947	A-A	2	13	4	(A)6-(A)7	noncoding
Leptolyngbya sp. FACHB-239	362	29957	29978	T-CT	2	12	10	(T)6-(CT)3	coding
Leptolyngbya sp. FACHB-239	363	39061	39075	TC-CG	2	12	3	(TC)3-(CG)3	coding
Leptolyngbya sp. FACHB-239	364	40841	40866	A-T-AC	3	19	7	(A)6-(T)7-(AC)3	coding
Leptolyngbya sp. FACHB-239	365	8995	9021	AG-TTC-TTC	3	24	3	(AG)3-(TTC)3-(TTC)3	coding
Leptolyngbya sp. FACHB-239	366	51809	51830	AG-CG	2	12	10	(AG)3-(CG)3	noncoding
Leptolyngbya sp. FACHB-239	367	61075	61092	CA-CCG	2	17	1	(CA)4-(CCG)3	coding
Leptolyngbya sp. FACHB-239	368	94199	94215	GA-AG	2	14	3	(GA)3-(AG)4	coding
Leptolyngbya sp. FACHB-239	369	95580	95592	AC-T	2	12	1	(AC)3-(T)6	coding
Leptolyngbya sp. FACHB-239	370	108456	108472	GA-G	2	12	5	(GA)3-(G)6	noncoding
Leptolyngbya sp. FACHB-239	371	136270	136287	T-T	2	12	6	(T)6-(T)6	coding
Leptolyngbya sp. FACHB-239	372	137292	137308	GC-AG	2	12	5	(GC)3-(AG)3	coding
Leptolyngbya sp. FACHB-239	373	138202	138218	CT-TC	2	16	1	(CT)4-(TC)4	noncoding
Leptolyngbya sp. FACHB-239	374	146319	146334	T-A	2	12	4	(T)6-(A)6	coding
Leptolyngbya sp. FACHB-239	375	150928	150941	CG-CT	2	12	2	(CG)3-(CT)3	coding
Leptolyngbya sp. FACHB-239	376	157745	157766	CA-A	2	12	10	(CA)3-(A)6	coding
Leptolyngbya sp. FACHB-239	377	178438	178449	CT-CA	2	12	0	(CT)3-(CA)3	noncoding
Leptolyngbya sp. FACHB-239	378	183723	183742	G-AG	2	12	8	(G)6-(AG)3	coding
Leptolyngbya sp. FACHB-239	379	185514	185535	A-T	2	14	8	(A)7-(T)7	noncoding
Leptolyngbya sp. FACHB-239	380	192708	192751	GA-A-TC-TA	4	24	20	(GA)3-(A)6-(TC)3-(TA)3	noncoding
Leptolyngbya sp. FACHB-239	381	199470	199484	AGC-GA	2	15	0	(AGC)3-(GA)3	coding
Leptolyngbya sp. FACHB-239	382	223403	223424	TG-T	2	12	10	(TG)3-(T)6	coding
Leptolyngbya sp. FACHB-239	383	226488	226501	TG-GA	2	12	2	(TG)3-(GA)3	noncoding
Leptolyngbya sp. FACHB-239	384	232671	232695	GTT-T	2	15	10	(GTT)3-(T)6	coding
Leptolyngbya sp. FACHB-239	385	241113	241133	A-CA	2	12	9	(A)6-(CA)3	noncoding
Leptolyngbya sp. FACHB-239	386	241337	241363	AAG-ATC	2	18	9	(AAG)3-(ATC)3	coding
Leptolyngbya sp. FACHB-239	387	244216	244235	TC-TC	2	12	8	(TC)3-(TC)3	coding
Leptolyngbya sp. FACHB-239	388	247416	247436	A-CT	2	12	9	(A)6-(CT)3	noncoding
Leptolyngbya sp. FACHB-239	389	337836	337849	GA-TC	2	12	2	(GA)3-(TC)3	noncoding
Leptolyngbya sp. FACHB-239	390	352566	352578	T-A	2	12	1	(T)6-(A)6	noncoding
Leptolyngbya sp. FACHB-239	391	36408	36447	T-AG-T-T	4	27	13	(T)7-(AG)3-(T)8-(T)6	noncoding
Leptolyngbya sp. FACHB-239	392	41821	41842	A-TC	2	12	10	(A)6-(TC)3	noncoding
Leptolyngbya sp. FACHB-239	393	11245	11265	CG-AT	2	12	9	(CG)3-(AT)3	coding
Leptolyngbya sp. FACHB-239	394	17862	17883	CG-GC	2	12	10	(CG)3-(GC)3	coding
Leptolyngbya sp. FACHB-239	395	17822	17842	TAC-A	2	15	6	(TAC)3-(A)6	coding
Leptolyngbya sp. FACHB-239	396	18092	18116	TA-AGC	2	15	10	(TA)3-(AGC)3	coding
Leptolyngbya sp. FACHB-239	397	20121	20150	GA-A-CG	3	19	11	(GA)3-(A)7-(CG)3	coding
Leptolyngbya sp. FACHB-239	398	41280	41294	GA-A	2	12	3	(GA)3-(A)6	noncoding
Leptolyngbya sp. FACHB-239	399	16038	16061	TG-TGC	2	15	9	(TG)3-(TGC)3	coding
Leptolyngbya sp. FACHB-239	400	37252	37265	A-T	2	12	2	(A)6-(T)6	noncoding
Leptolyngbya sp. FACHB-239	401	15474	15491	A-GA	2	12	6	(A)6-(GA)3	coding
Leptolyngbya sp. FACHB-239	402	28421	28440	A-TC	2	12	8	(A)6-(TC)3	noncoding
Leptolyngbya sp. FACHB-239	403	5313	5332	TC-TAG	2	15	5	(TC)3-(TAG)3	coding
Leptolyngbya sp. FACHB-239	404	12195	12207	T-GC	2	12	1	(T)6-(GC)3	coding
Leptolyngbya sp. FACHB-239	405	24398	24417	GA-GA	2	12	8	(GA)3-(GA)3	coding
Leptolyngbya sp. FACHB-239	406	24969	24990	T-AC	2	12	10	(T)6-(AC)3	noncoding
Leptolyngbya sp. FACHB-239	407	4643	4657	TCA-A	2	15	0	(TCA)3-(A)6	coding
Leptolyngbya sp. FACHB-239	408	12805	12826	GA-AAG	2	15	7	(GA)3-(AAG)3	coding
Leptolyngbya sp. FACHB-239	409	7761	7779	CG-A	2	13	6	(CG)3-(A)7	coding
Leptolyngbya sp. FACHB-239	410	5358	5369	TC-A	2	12	0	(TC)3-(A)6	coding
Leptolyngbya sp. FACHB-239	411	13130	13148	T-ATT	2	15	4	(T)6-(ATT)3	noncoding
Leptolyngbya sp. FACHB-239	412	18601	18614	TG-G	2	12	2	(TG)3-(G)6	coding
Leptolyngbya sp. FACHB-239	413	15030	15046	GTG-GA	2	15	2	(GTG)3-(GA)3	coding
Leptolyngbya sp. FACHB-239	414	23672	23693	TTG-T	2	16	6	(TTG)3-(T)7	coding
Leptolyngbya sp. FACHB-239	415	53885	53899	CA-T	2	12	3	(CA)3-(T)6	coding
Leptolyngbya sp. FACHB-239	416	61405	61419	TG-T	2	12	3	(TG)3-(T)6	noncoding
Leptolyngbya sp. FACHB-239	417	95166	95205	T-AC-A-AT	4	25	15	(T)7-(AC)3-(A)6-(AT)3	noncoding
Leptolyngbya sp. FACHB-239	418	95950	95969	A-CCA	2	16	4	(A)7-(CCA)3	coding
Leptolyngbya sp. FACHB-239	419	102130	102151	T-AG	2	14	8	(T)6-(AG)4	noncoding
Leptolyngbya sp. FACHB-239	420	106213	106234	T-GC	2	12	10	(T)6-(GC)3	coding
Leptolyngbya sp. FACHB-239	421	125884	125897	TA-TA	2	12	2	(TA)3-(TA)3	noncoding
Leptolyngbya sp. FACHB-239	422	132233	132250	T-A	2	13	5	(T)6-(A)7	noncoding
Leptolyngbya sp. FACHB-239	423	149775	149788	T-GA	2	13	1	(T)7-(GA)3	coding
Leptolyngbya sp. FACHB-239	424	156840	156860	CT-T	2	12	9	(CT)3-(T)6	noncoding
Leptolyngbya sp. FACHB-239	425	169216	169230	AG-TCG	2	15	0	(AG)3-(TCG)3	coding
Leptolyngbya sp. FACHB-239	426	196459	196471	GA-AG	2	12	1	(GA)3-(AG)3	coding
Leptolyngbya sp. FACHB-239	427	204111	204131	TC-TC	2	12	9	(TC)3-(TC)3	noncoding
Leptolyngbya sp. FACHB-239	428	216843	216856	TA-CT	2	12	2	(TA)3-(CT)3	coding
Leptolyngbya sp. FACHB-239	429	238491	238510	GC-AGA	2	15	5	(GC)3-(AGA)3	coding
Leptolyngbya sp. FACHB-239	430	244241	244252	GA-A	2	12	0	(GA)3-(A)6	noncoding
Leptolyngbya sp. FACHB-239	431	247543	247568	GCA-TC	2	18	8	(GCA)4-(TC)3	coding
Leptolyngbya sp. FACHB-239	432	248302	248326	CGA-T	2	15	10	(CGA)3-(T)6	coding
Leptolyngbya sp. FACHB-239	433	255586	255603	A-AG	2	12	6	(A)6-(AG)3	coding
Leptolyngbya sp. FACHB-239	434	272858	272877	AC-CG	2	12	8	(AC)3-(CG)3	coding
Leptolyngbya sp. FACHB-239	435	274540	274552	A-CG	2	12	1	(A)6-(CG)3	coding
Leptolyngbya sp. FACHB-239	436	283674	283688	T-TC	2	13	2	(T)7-(TC)3	noncoding
Leptolyngbya sp. FACHB-239	437	303227	303239	AG-GA	2	12	1	(AG)3-(GA)3	coding
Leptolyngbya sp. FACHB-239	438	310741	310752	AG-T	2	12	0	(AG)3-(T)6	coding
Leptolyngbya sp. FACHB-239	439	331809	331828	T-T	2	12	8	(T)6-(T)6	noncoding
Leptolyngbya sp. FACHB-239	440	351200	351216	A-A	2	13	4	(A)6-(A)7	noncoding
Leptolyngbya sp. FACHB-239	441	351356	351371	CG-AG	2	12	4	(CG)3-(AG)3	coding
Leptolyngbya sp. FACHB-239	442	1305	1319	T-GCA	2	15	0	(T)6-(GCA)3	coding
Leptolyngbya sp. FACHB-239	443	20690	20704	GA-A	2	12	3	(GA)3-(A)6	noncoding
Leptolyngbya sp. FACHB-239	444	4684	4698	A-AC	2	12	3	(A)6-(AC)3	coding
Leptolyngbya sp. FACHB-239	445	17343	17360	TC-A	2	12	6	(TC)3-(A)6	coding
Leptolyngbya sp. FACHB-239	446	12557	12577	AGC-AGC	2	18	3	(AGC)3-(AGC)3	coding
Leptolyngbya sp. FACHB-239	447	17184	17199	CG-AG	2	12	4	(CG)3-(AG)3	coding
Leptolyngbya sp. FACHB-239	448	9775	9795	TC-GA	2	12	9	(TC)3-(GA)3	noncoding
Leptolyngbya sp. FACHB-239	449	15192	15206	GA-A	2	12	3	(GA)3-(A)6	noncoding
Leptolyngbya sp. FACHB-239	450	34028	34039	T-CG	2	12	0	(T)6-(CG)3	coding
Leptolyngbya sp. FACHB-239	451	38918	38935	T-TC	2	13	5	(T)7-(TC)3	noncoding
Leptolyngbya sp. FACHB-239	452	47354	47373	CA-CG	2	12	8	(CA)3-(CG)3	coding
Leptolyngbya sp. FACHB-239	453	47816	47837	A-AGG	2	15	7	(A)6-(AGG)3	noncoding
Leptolyngbya sp. FACHB-239	454	76464	76476	A-GA	2	12	1	(A)6-(GA)3	coding
Leptolyngbya sp. FACHB-239	455	78140	78158	GA-TC	2	12	7	(GA)3-(TC)3	coding
Leptolyngbya sp. FACHB-239	456	79258	79271	T-T	2	12	2	(T)6-(T)6	coding
Leptolyngbya sp. FACHB-239	457	92926	92938	AT-T	2	12	1	(AT)3-(T)6	coding
Leptolyngbya sp. FACHB-239	458	124358	124371	GA-GA	2	12	2	(GA)3-(GA)3	noncoding
Leptolyngbya sp. FACHB-239	459	137757	137777	AC-CG	2	12	9	(AC)3-(CG)3	coding
Leptolyngbya sp. FACHB-239	460	143133	143147	TAC-A	2	15	0	(TAC)3-(A)6	noncoding
Leptolyngbya sp. FACHB-239	461	146732	146753	GA-AT	2	12	10	(GA)3-(AT)3	coding
Leptolyngbya sp. FACHB-239	462	172334	172349	T-T	2	12	4	(T)6-(T)6	noncoding
Leptolyngbya sp. FACHB-239	463	174996	175018	CT-AG	2	14	9	(CT)4-(AG)3	coding
Leptolyngbya sp. FACHB-239	464	210903	210917	T-T	2	12	3	(T)6-(T)6	noncoding
Leptolyngbya sp. FACHB-239	465	238803	238822	G-AT	2	12	8	(G)6-(AT)3	coding
Leptolyngbya sp. FACHB-239	466	241772	241794	CAG-GCA	2	21	2	(CAG)3-(GCA)4	coding
Leptolyngbya sp. FACHB-239	467	268995	269011	TA-CT	2	12	5	(TA)3-(CT)3	coding
Leptolyngbya sp. FACHB-239	468	277273	277290	TG-TC	2	12	6	(TG)3-(TC)3	coding
Leptolyngbya sp. FACHB-239	469	279285	279306	TCG-CTT	2	18	4	(TCG)3-(CTT)3	coding
Leptolyngbya sp. FACHB-239	470	302636	302651	AGA-TC	2	15	1	(AGA)3-(TC)3	coding
Leptolyngbya sp. FACHB-239	471	302840	302868	CAG-GCA	2	21	8	(CAG)3-(GCA)4	coding
Leptolyngbya sp. FACHB-239	472	305173	305197	CAG-TGG	2	18	7	(CAG)3-(TGG)3	coding
Leptolyngbya sp. FACHB-239	473	312877	312892	AC-T	2	12	4	(AC)3-(T)6	coding
Leptolyngbya sp. FACHB-239	474	318692	318705	GC-T	2	12	2	(GC)3-(T)6	coding
Leptolyngbya sp. FACHB-239	475	11067	11091	TC-GAA	2	15	10	(TC)3-(GAA)3	coding
Leptolyngbya sp. FACHB-239	476	11478	11494	A-A	2	12	5	(A)6-(A)6	coding
Leptolyngbya sp. FACHB-239	477	292	304	G-T	2	12	1	(G)6-(T)6	noncoding
Leptolyngbya sp. FACHB-239	478	13232	13252	GA-AG	2	12	9	(GA)3-(AG)3	noncoding
Leptolyngbya sp. FACHB-239	479	7191	7211	TC-T	2	12	9	(TC)3-(T)6	coding
Leptolyngbya sp. FACHB-239	480	3992	4004	CG-TG	2	12	1	(CG)3-(TG)3	coding
Leptolyngbya sp. FACHB-239	481	4286	4307	AT-A	2	12	10	(AT)3-(A)6	noncoding
Leptolyngbya sp. FACHB-239	482	6076	6094	TCC-T	2	15	4	(TCC)3-(T)6	noncoding
Leptolyngbya sp. FACHB-239	483	4873	4897	GA-ACC	2	15	10	(GA)3-(ACC)3	coding
Leptolyngbya sp. FACHB-239	484	514	528	C-C	2	12	3	(C)6-(C)6	coding
Leptolyngbya sp. FACHB-239	485	2165	2183	GT-CG	2	12	7	(GT)3-(CG)3	coding
Leptolyngbya sp. FACHB-239	486	28447	28466	GA-A	2	12	8	(GA)3-(A)6	noncoding
Leptolyngbya sp. FACHB-239	487	34042	34054	AC-A	2	12	1	(AC)3-(A)6	noncoding
Leptolyngbya sp. FACHB-239	488	38851	38870	AAC-A	2	18	2	(AAC)3-(A)9	noncoding
Leptolyngbya sp. FACHB-239	489	49650	49670	TC-AGT	2	15	6	(TC)3-(AGT)3	coding
Leptolyngbya sp. FACHB-239	490	55692	55708	AG-AG	2	12	5	(AG)3-(AG)3	coding
Leptolyngbya sp. FACHB-239	491	132687	132701	A-A	2	12	3	(A)6-(A)6	coding
Leptolyngbya sp. FACHB-239	492	145253	145272	GT-GA	2	14	6	(GT)3-(GA)4	noncoding
Leptolyngbya sp. FACHB-239	493	145458	145474	TG-AT	2	12	5	(TG)3-(AT)3	coding
Leptolyngbya sp. FACHB-239	494	146555	146578	TC-A-GT	3	18	6	(TC)3-(A)6-(GT)3	noncoding
Leptolyngbya sp. FACHB-239	495	229818	229840	T-AAGT	2	18	5	(T)6-(AAGT)3	noncoding
Leptolyngbya sp. FACHB-239	496	229981	230002	TC-CT	2	12	10	(TC)3-(CT)3	noncoding
Leptolyngbya sp. FACHB-239	497	232120	232133	CG-AT	2	12	2	(CG)3-(AT)3	coding
Leptolyngbya sp. FACHB-239	498	239680	239701	T-GC	2	12	10	(T)6-(GC)3	noncoding
Leptolyngbya sp. FACHB-239	499	39	53	T-TC	2	12	3	(T)6-(TC)3	noncoding
Leptolyngbya sp. FACHB-239	500	3595	3627	GGA-A-A	3	22	11	(GGA)3-(A)6-(A)7	coding
Leptolyngbya sp. FACHB-239	501	836	853	GA-GC	2	12	6	(GA)3-(GC)3	coding
Leptolyngbya sp. FACHB-239	502	240	260	T-GT	2	12	9	(T)6-(GT)3	noncoding
Leptolyngbya sp. FACHB-239	503	4784	4807	A-GA	2	16	8	(A)6-(GA)5	coding
Leptolyngbya sp. FACHB-239	504	9498	9520	GCA-CG	2	15	8	(GCA)3-(CG)3	coding
Leptolyngbya sp. FACHB-239	505	27650	27672	CG-GC	2	14	9	(CG)3-(GC)4	coding
Leptolyngbya sp. FACHB-239	506	33187	33201	A-GAA	2	15	0	(A)6-(GAA)3	coding
Leptolyngbya sp. FACHB-239	507	46506	46518	AG-CT	2	12	1	(AG)3-(CT)3	noncoding
Leptolyngbya sp. FACHB-239	508	63329	63346	CA-GT	2	12	6	(CA)3-(GT)3	coding
Leptolyngbya sp. FACHB-239	509	66607	66627	GA-GA	2	12	9	(GA)3-(GA)3	coding
Leptolyngbya sp. FACHB-239	510	74045	74065	CT-A	2	12	9	(CT)3-(A)6	coding
Leptolyngbya sp. FACHB-239	511	74275	74294	GC-A	2	12	8	(GC)3-(A)6	coding
Leptolyngbya sp. FACHB-239	512	88046	88057	CG-A	2	12	0	(CG)3-(A)6	coding
Leptolyngbya sp. FACHB-239	513	102466	102478	GC-T	2	12	1	(GC)3-(T)6	coding
Leptolyngbya sp. FACHB-239	514	124191	124205	CAA-TC	2	15	0	(CAA)3-(TC)3	coding
Leptolyngbya sp. FACHB-239	515	125510	125526	A-C	2	12	5	(A)6-(C)6	coding
Leptolyngbya sp. FACHB-239	516	136632	136648	GT-TG	2	12	5	(GT)3-(TG)3	coding
Leptolyngbya sp. FACHB-239	517	142779	142792	AG-TG	2	12	2	(AG)3-(TG)3	noncoding
Leptolyngbya sp. FACHB-239	518	154204	154228	CAA-TCT	2	18	7	(CAA)3-(TCT)3	coding
Leptolyngbya sp. FACHB-239	519	159382	159403	GC-CCA	2	15	7	(GC)3-(CCA)3	coding
Leptolyngbya sp. FACHB-239	520	214375	214392	CGA-GA	2	15	3	(CGA)3-(GA)3	coding
Leptolyngbya sp. FACHB-239	521	2915	2931	GA-G	2	14	3	(GA)4-(G)6	coding
Leptolyngbya sp. FACHB-239	522	7911	7929	GAA-GA	2	17	2	(GAA)3-(GA)4	coding
Leptolyngbya sp. FACHB-239	523	18071	18083	GC-CA	2	12	1	(GC)3-(CA)3	coding
Leptolyngbya sp. FACHB-239	524	19369	19382	AT-CT	2	12	2	(AT)3-(CT)3	noncoding
Leptolyngbya sp. FACHB-239	525	34655	34673	A-A	2	12	7	(A)6-(A)6	noncoding
Leptolyngbya sp. FACHB-239	526	39401	39414	GC-A	2	12	2	(GC)3-(A)6	coding
Leptolyngbya sp. FACHB-239	527	43642	43663	CT-T	2	12	10	(CT)3-(T)6	noncoding
Leptolyngbya sp. FACHB-239	528	115535	115546	CT-A	2	12	0	(CT)3-(A)6	coding
Leptolyngbya sp. FACHB-239	529	129977	129992	AG-GA	2	14	2	(AG)3-(GA)4	noncoding
Leptolyngbya sp. FACHB-239	530	134742	134753	GA-TC	2	12	0	(GA)3-(TC)3	coding
Leptolyngbya sp. FACHB-239	531	139530	139545	GC-TCG	2	15	1	(GC)3-(TCG)3	coding
Leptolyngbya sp. FACHB-239	532	140504	140523	C-C	2	12	8	(C)6-(C)6	coding
Leptolyngbya sp. FACHB-239	533	146617	146633	CG-AC	2	12	5	(CG)3-(AC)3	coding
Leptolyngbya sp. FACHB-239	534	163228	163245	A-GT	2	12	6	(A)6-(GT)3	coding
Leptolyngbya sp. FACHB-239	535	174592	174618	CT-A-TG	3	18	9	(CT)3-(A)6-(TG)3	coding
Leptolyngbya sp. FACHB-239	536	187622	187644	GA-TGA	2	15	8	(GA)3-(TGA)3	coding
Leptolyngbya sp. FACHB-239	537	197264	197280	CT-GA	2	12	5	(CT)3-(GA)3	coding
Leptolyngbya sp. FACHB-239	538	202913	202954	ATC-TC-CTTC	3	27	15	(ATC)3-(TC)3-(CTTC)3	coding
Leptolyngbya sp. FACHB-239	539	203120	203140	GGC-ACC	2	18	3	(GGC)3-(ACC)3	coding
Leptolyngbya sp. FACHB-238	1	37	55	A-GGA	2	15	4	(A)6-(GGA)3	noncoding
Leptolyngbya sp. FACHB-238	2	16079	16099	TG-GC	2	12	9	(TG)3-(GC)3	coding
Leptolyngbya sp. FACHB-238	3	32929	32951	GA-GC	2	16	7	(GA)5-(GC)3	coding
Leptolyngbya sp. FACHB-238	4	34631	34646	GA-A	2	13	3	(GA)3-(A)7	coding
Leptolyngbya sp. FACHB-238	5	44530	44542	TC-AG	2	12	1	(TC)3-(AG)3	coding
Leptolyngbya sp. FACHB-238	6	46180	46197	A-TTAA	2	18	0	(A)6-(TTAA)3	noncoding
Leptolyngbya sp. FACHB-238	7	50634	50654	A-A	2	13	8	(A)6-(A)7	noncoding
Leptolyngbya sp. FACHB-238	8	56951	56967	GC-T	2	13	4	(GC)3-(T)7	coding
Leptolyngbya sp. FACHB-238	9	58548	58566	TC-T	2	12	7	(TC)3-(T)6	noncoding
Leptolyngbya sp. FACHB-238	10	65672	65690	A-A	2	12	7	(A)6-(A)6	noncoding
Leptolyngbya sp. FACHB-238	11	74356	74377	A-GC	2	12	10	(A)6-(GC)3	coding
Leptolyngbya sp. FACHB-238	12	83722	83741	A-GA	2	12	8	(A)6-(GA)3	noncoding
Leptolyngbya sp. FACHB-238	13	86707	86722	T-GA	2	13	3	(T)7-(GA)3	coding
Leptolyngbya sp. FACHB-238	14	92321	92334	A-TC	2	12	2	(A)6-(TC)3	noncoding
Leptolyngbya sp. FACHB-238	15	125210	125224	TC-ATC	2	15	0	(TC)3-(ATC)3	coding
Leptolyngbya sp. FACHB-238	16	151001	151019	AC-T	2	12	7	(AC)3-(T)6	noncoding
Leptolyngbya sp. FACHB-238	17	177692	177709	A-GTC	2	15	3	(A)6-(GTC)3	coding
Leptolyngbya sp. FACHB-238	18	180395	180413	AG-TC	2	12	7	(AG)3-(TC)3	noncoding
Leptolyngbya sp. FACHB-238	19	213002	213014	CA-AG	2	12	1	(CA)3-(AG)3	coding
Leptolyngbya sp. FACHB-238	20	213795	213806	A-GT	2	12	0	(A)6-(GT)3	coding
Leptolyngbya sp. FACHB-238	21	223766	223793	CTT-TTC	2	24	4	(CTT)4-(TTC)4	coding
Leptolyngbya sp. FACHB-238	22	226916	226935	TG-TC	2	12	8	(TG)3-(TC)3	coding
Leptolyngbya sp. FACHB-238	23	236490	236508	TTGC-TG	2	18	1	(TTGC)3-(TG)3	coding
Leptolyngbya sp. FACHB-238	24	242878	242898	TC-CAA	2	15	6	(TC)3-(CAA)3	coding
Leptolyngbya sp. FACHB-238	25	244346	244363	TC-GCA	2	15	3	(TC)3-(GCA)3	coding
Leptolyngbya sp. FACHB-238	26	267465	267482	T-AG	2	12	6	(T)6-(AG)3	noncoding
Leptolyngbya sp. FACHB-238	27	278007	278027	A-AG	2	12	9	(A)6-(AG)3	coding
Leptolyngbya sp. FACHB-238	28	283475	283497	CA-A-CT	3	20	3	(CA)3-(A)6-(CT)4	coding
Leptolyngbya sp. FACHB-238	29	284141	284157	AG-AG	2	12	5	(AG)3-(AG)3	coding
Leptolyngbya sp. FACHB-238	30	293667	293687	GC-CAC	2	15	6	(GC)3-(CAC)3	coding
Leptolyngbya sp. FACHB-238	31	302143	302162	A-A	2	12	8	(A)6-(A)6	noncoding
Leptolyngbya sp. FACHB-238	32	315106	315129	T-TCC	2	16	8	(T)7-(TCC)3	coding
Leptolyngbya sp. FACHB-238	33	334458	334474	T-A	2	13	4	(T)6-(A)7	noncoding
Leptolyngbya sp. FACHB-238	34	380780	380793	AG-TC	2	14	0	(AG)3-(TC)4	noncoding
Leptolyngbya sp. FACHB-238	35	381672	381693	CT-T	2	12	10	(CT)3-(T)6	coding
Leptolyngbya sp. FACHB-238	36	388854	388869	T-GT	2	12	4	(T)6-(GT)3	coding
Leptolyngbya sp. FACHB-238	37	400515	400530	CA-A	2	12	4	(CA)3-(A)6	coding
Leptolyngbya sp. FACHB-238	38	436381	436396	AG-TC	2	12	4	(AG)3-(TC)3	coding
Leptolyngbya sp. FACHB-238	39	460843	460854	CT-TG	2	12	0	(CT)3-(TG)3	noncoding
Leptolyngbya sp. FACHB-238	40	466226	466247	AGC-AG	2	15	7	(AGC)3-(AG)3	coding
Leptolyngbya sp. FACHB-238	41	469999	470013	CT-AG	2	12	3	(CT)3-(AG)3	coding
Leptolyngbya sp. FACHB-238	42	477569	477590	AG-CA	2	12	10	(AG)3-(CA)3	noncoding
Leptolyngbya sp. FACHB-238	43	491414	491429	AG-TC	2	12	4	(AG)3-(TC)3	coding
Leptolyngbya sp. FACHB-238	44	500329	500344	T-AG	2	12	4	(T)6-(AG)3	coding
Leptolyngbya sp. FACHB-238	45	507349	507363	A-GA	2	14	1	(A)8-(GA)3	noncoding
Leptolyngbya sp. FACHB-238	46	512599	512612	T-T	2	12	2	(T)6-(T)6	noncoding
Leptolyngbya sp. FACHB-238	47	523091	523102	CA-AG	2	12	0	(CA)3-(AG)3	coding
Leptolyngbya sp. FACHB-238	48	529986	530007	CTG-CTG	2	18	4	(CTG)3-(CTG)3	coding
Leptolyngbya sp. FACHB-238	49	530669	530682	GC-T	2	12	2	(GC)3-(T)6	coding
Leptolyngbya sp. FACHB-238	50	545074	545090	A-G	2	12	5	(A)6-(G)6	coding
Leptolyngbya sp. FACHB-238	51	553758	553781	TC-AG-A	3	18	6	(TC)3-(AG)3-(A)6	noncoding
Leptolyngbya sp. FACHB-238	52	555278	555290	TG-TG	2	12	1	(TG)3-(TG)3	coding
Leptolyngbya sp. FACHB-238	53	557816	557846	T-T-A	3	19	12	(T)6-(T)7-(A)6	noncoding
Leptolyngbya sp. FACHB-238	54	561626	561643	GT-GC	2	12	6	(GT)3-(GC)3	coding
Leptolyngbya sp. FACHB-238	55	590566	590586	TC-AG	2	12	9	(TC)3-(AG)3	noncoding
Leptolyngbya sp. FACHB-238	56	595293	595305	TA-T	2	12	1	(TA)3-(T)6	noncoding
Leptolyngbya sp. FACHB-238	57	612757	612780	TC-GCA	2	15	9	(TC)3-(GCA)3	coding
Leptolyngbya sp. FACHB-238	58	671023	671042	TCG-GC	2	15	5	(TCG)3-(GC)3	coding
Leptolyngbya sp. FACHB-238	59	675628	675646	A-A	2	12	7	(A)6-(A)6	noncoding
Leptolyngbya sp. FACHB-238	60	692988	693004	AG-GT	2	12	5	(AG)3-(GT)3	coding
Leptolyngbya sp. FACHB-238	61	695848	695869	A-AT	2	12	10	(A)6-(AT)3	coding
Leptolyngbya sp. FACHB-238	62	702477	702497	A-CT	2	12	9	(A)6-(CT)3	coding
Leptolyngbya sp. FACHB-238	63	704411	704423	T-GA	2	12	1	(T)6-(GA)3	coding
Leptolyngbya sp. FACHB-238	64	718404	718420	A-A	2	12	5	(A)6-(A)6	noncoding
Leptolyngbya sp. FACHB-238	65	3441	3462	A-TCA	2	15	7	(A)6-(TCA)3	coding
Leptolyngbya sp. FACHB-238	66	3595	3622	TC-AT-T	3	19	9	(TC)3-(AT)3-(T)7	coding
Leptolyngbya sp. FACHB-238	67	41708	41722	AT-A	2	12	3	(AT)3-(A)6	noncoding
Leptolyngbya sp. FACHB-238	68	92916	92927	CG-GT	2	12	0	(CG)3-(GT)3	coding
Leptolyngbya sp. FACHB-238	69	93471	93490	GC-A	2	12	8	(GC)3-(A)6	coding
Leptolyngbya sp. FACHB-238	70	104201	104221	TG-TG	2	12	9	(TG)3-(TG)3	coding
Leptolyngbya sp. FACHB-238	71	112208	112227	CTT-GT	2	15	5	(CTT)3-(GT)3	coding
Leptolyngbya sp. FACHB-238	72	114277	114292	A-T	2	12	4	(A)6-(T)6	noncoding
Leptolyngbya sp. FACHB-238	73	172187	172209	TGA-CT	2	15	8	(TGA)3-(CT)3	coding
Leptolyngbya sp. FACHB-238	74	174775	174788	A-T	2	13	1	(A)7-(T)6	coding
Leptolyngbya sp. FACHB-238	75	177461	177483	A-A	2	13	10	(A)6-(A)7	noncoding
Leptolyngbya sp. FACHB-238	76	183386	183407	GA-TC-T	3	18	4	(GA)3-(TC)3-(T)6	noncoding
Leptolyngbya sp. FACHB-238	77	192269	192284	GCT-A	2	15	1	(GCT)3-(A)6	coding
Leptolyngbya sp. FACHB-238	78	204843	204862	A-T	2	13	7	(A)7-(T)6	coding
Leptolyngbya sp. FACHB-238	79	17135	17150	T-T	2	13	3	(T)7-(T)6	coding
Leptolyngbya sp. FACHB-238	80	38344	38360	TC-TC	2	12	5	(TC)3-(TC)3	noncoding
Leptolyngbya sp. FACHB-238	81	44750	44766	A-C	2	12	5	(A)6-(C)6	noncoding
Leptolyngbya sp. FACHB-238	82	49992	50010	CTG-T	2	15	4	(CTG)3-(T)6	noncoding
Leptolyngbya sp. FACHB-238	83	62237	62255	A-ATC	2	15	4	(A)6-(ATC)3	coding
Leptolyngbya sp. FACHB-238	84	73597	73613	AG-A	2	15	2	(AG)4-(A)7	coding
Leptolyngbya sp. FACHB-238	85	103428	103439	GC-T	2	12	0	(GC)3-(T)6	coding
Leptolyngbya sp. FACHB-238	86	118592	118610	CT-CG	2	12	7	(CT)3-(CG)3	coding
Leptolyngbya sp. FACHB-238	87	127775	127796	A-GC	2	14	8	(A)6-(GC)4	coding
Leptolyngbya sp. FACHB-238	88	167824	167846	A-T	2	13	10	(A)7-(T)6	noncoding
Leptolyngbya sp. FACHB-238	89	171184	171205	TC-GC	2	12	10	(TC)3-(GC)3	coding
Leptolyngbya sp. FACHB-238	90	177135	177149	T-G	2	12	3	(T)6-(G)6	coding
Leptolyngbya sp. FACHB-238	91	198683	198702	A-GC	2	12	8	(A)6-(GC)3	coding
Leptolyngbya sp. FACHB-238	92	8754	8772	T-T	2	12	7	(T)6-(T)6	noncoding
Leptolyngbya sp. FACHB-238	93	15389	15404	TC-T	2	13	3	(TC)3-(T)7	coding
Leptolyngbya sp. FACHB-238	94	25048	25060	GC-AT	2	12	1	(GC)3-(AT)3	noncoding
Leptolyngbya sp. FACHB-238	95	41765	41794	CG-GA-GA	3	20	10	(CG)3-(GA)3-(GA)4	noncoding
Leptolyngbya sp. FACHB-238	96	46564	46584	G-CG	2	12	9	(G)6-(CG)3	coding
Leptolyngbya sp. FACHB-238	97	57856	57877	C-GT	2	12	10	(C)6-(GT)3	coding
Leptolyngbya sp. FACHB-238	98	66609	66625	T-T	2	13	4	(T)7-(T)6	coding
Leptolyngbya sp. FACHB-238	99	69285	69306	TA-A	2	15	7	(TA)4-(A)7	noncoding
Leptolyngbya sp. FACHB-238	100	77046	77065	CT-CT	2	14	6	(CT)4-(CT)3	noncoding
Leptolyngbya sp. FACHB-238	101	83347	83361	T-T	2	12	3	(T)6-(T)6	noncoding
Leptolyngbya sp. FACHB-238	102	86685	86700	GA-AG	2	12	4	(GA)3-(AG)3	noncoding
Leptolyngbya sp. FACHB-238	103	104362	104376	A-A	2	12	3	(A)6-(A)6	noncoding
Leptolyngbya sp. FACHB-238	104	116769	116783	AG-TC	2	14	1	(AG)4-(TC)3	coding
Leptolyngbya sp. FACHB-238	105	134367	134383	A-GA	2	12	5	(A)6-(GA)3	coding
Leptolyngbya sp. FACHB-238	106	150890	150908	A-T	2	12	7	(A)6-(T)6	coding
Leptolyngbya sp. FACHB-238	107	178598	178616	GA-A	2	12	7	(GA)3-(A)6	coding
Leptolyngbya sp. FACHB-238	108	186587	186606	A-A	2	12	8	(A)6-(A)6	noncoding
Leptolyngbya sp. FACHB-238	109	196769	196780	TC-A	2	12	0	(TC)3-(A)6	noncoding
Leptolyngbya sp. FACHB-238	110	6070	6085	CT-CT	2	12	4	(CT)3-(CT)3	coding
Leptolyngbya sp. FACHB-238	111	13610	13639	A-GA-CT	3	18	12	(A)6-(GA)3-(CT)3	coding
Leptolyngbya sp. FACHB-238	112	17061	17082	CG-AC	2	12	10	(CG)3-(AC)3	coding
Leptolyngbya sp. FACHB-238	113	22788	22806	TCT-CA	2	15	4	(TCT)3-(CA)3	noncoding
Leptolyngbya sp. FACHB-238	114	23323	23337	AT-AT	2	12	3	(AT)3-(AT)3	noncoding
Leptolyngbya sp. FACHB-238	115	23894	23914	GCT-GA	2	15	6	(GCT)3-(GA)3	coding
Leptolyngbya sp. FACHB-238	116	47078	47102	GAA-CT	2	15	10	(GAA)3-(CT)3	coding
Leptolyngbya sp. FACHB-238	117	61836	61847	TG-AC	2	12	0	(TG)3-(AC)3	noncoding
Leptolyngbya sp. FACHB-238	118	67064	67076	GT-A	2	12	1	(GT)3-(A)6	noncoding
Leptolyngbya sp. FACHB-238	119	67319	67344	CA-GCA	2	17	9	(CA)4-(GCA)3	noncoding
Leptolyngbya sp. FACHB-238	120	71674	71701	TA-TA-TA	3	20	8	(TA)3-(TA)4-(TA)3	noncoding
Leptolyngbya sp. FACHB-238	121	73861	73877	GA-TC	2	12	5	(GA)3-(TC)3	coding
Leptolyngbya sp. FACHB-238	122	75880	75900	AG-TC	2	12	9	(AG)3-(TC)3	coding
Leptolyngbya sp. FACHB-238	123	78261	78282	AATG-AC	2	18	4	(AATG)3-(AC)3	noncoding
Leptolyngbya sp. FACHB-238	124	79521	79536	A-CT	2	12	4	(A)6-(CT)3	noncoding
Leptolyngbya sp. FACHB-238	125	79548	79566	CG-T	2	12	7	(CG)3-(T)6	noncoding
Leptolyngbya sp. FACHB-238	126	85295	85310	T-C	2	14	2	(T)6-(C)8	coding
Leptolyngbya sp. FACHB-238	127	93031	93052	TG-TTC	2	15	7	(TG)3-(TTC)3	coding
Leptolyngbya sp. FACHB-238	128	98976	98997	T-AG	2	12	10	(T)6-(AG)3	coding
Leptolyngbya sp. FACHB-238	129	101231	101249	GC-T	2	12	7	(GC)3-(T)6	noncoding
Leptolyngbya sp. FACHB-238	130	134753	134769	AC-CG	2	12	5	(AC)3-(CG)3	noncoding
Leptolyngbya sp. FACHB-238	131	149900	149916	CT-A	2	12	5	(CT)3-(A)6	noncoding
Leptolyngbya sp. FACHB-238	132	150961	150977	T-TC	2	12	5	(T)6-(TC)3	noncoding
Leptolyngbya sp. FACHB-238	133	156656	156669	A-CT	2	12	2	(A)6-(CT)3	noncoding
Leptolyngbya sp. FACHB-238	134	181237	181263	GGC-GAA	2	18	9	(GGC)3-(GAA)3	coding
Leptolyngbya sp. FACHB-238	135	647	658	GT-CT	2	12	0	(GT)3-(CT)3	coding
Leptolyngbya sp. FACHB-238	136	1488	1507	A-GC	2	13	7	(A)7-(GC)3	coding
Leptolyngbya sp. FACHB-238	137	4512	4533	CG-GT	2	14	8	(CG)4-(GT)3	coding
Leptolyngbya sp. FACHB-238	138	79865	79887	TGA-A	2	18	5	(TGA)4-(A)6	coding
Leptolyngbya sp. FACHB-238	139	82679	82695	A-CT	2	14	3	(A)8-(CT)3	coding
Leptolyngbya sp. FACHB-238	140	90513	90525	A-CT	2	12	1	(A)6-(CT)3	noncoding
Leptolyngbya sp. FACHB-238	141	107769	107789	A-A	2	13	8	(A)7-(A)6	noncoding
Leptolyngbya sp. FACHB-238	142	109475	109489	T-A	2	12	3	(T)6-(A)6	noncoding
Leptolyngbya sp. FACHB-238	143	147503	147527	T-TGC	2	15	10	(T)6-(TGC)3	coding
Leptolyngbya sp. FACHB-238	144	155087	155098	GA-AG	2	12	0	(GA)3-(AG)3	coding
Leptolyngbya sp. FACHB-238	145	155177	155188	GA-AG	2	12	0	(GA)3-(AG)3	coding
Leptolyngbya sp. FACHB-238	146	155267	155278	GA-AG	2	12	0	(GA)3-(AG)3	coding
Leptolyngbya sp. FACHB-238	147	166353	166370	G-CG	2	12	6	(G)6-(CG)3	coding
Leptolyngbya sp. FACHB-238	148	169787	169798	T-GT	2	12	0	(T)6-(GT)3	noncoding
Leptolyngbya sp. FACHB-238	149	172188	172207	GA-A	2	12	8	(GA)3-(A)6	noncoding
Leptolyngbya sp. FACHB-238	150	178364	178375	T-CT	2	12	0	(T)6-(CT)3	noncoding
Leptolyngbya sp. FACHB-238	151	182465	182479	GA-A	2	12	3	(GA)3-(A)6	noncoding
Leptolyngbya sp. FACHB-238	152	7924	7939	TG-G	2	12	4	(TG)3-(G)6	coding
Leptolyngbya sp. FACHB-238	153	17391	17405	GC-TC	2	12	3	(GC)3-(TC)3	coding
Leptolyngbya sp. FACHB-238	154	28315	28326	CG-A	2	12	0	(CG)3-(A)6	coding
Leptolyngbya sp. FACHB-238	155	30320	30345	TC-GCAAC	2	21	5	(TC)3-(GCAAC)3	coding
Leptolyngbya sp. FACHB-238	156	61531	61544	A-TC	2	12	2	(A)6-(TC)3	coding
Leptolyngbya sp. FACHB-238	157	85284	85305	AAG-AG	2	15	7	(AAG)3-(AG)3	coding
Leptolyngbya sp. FACHB-238	158	85844	85862	TG-T	2	12	7	(TG)3-(T)6	coding
Leptolyngbya sp. FACHB-238	159	88780	88801	CG-A	2	12	10	(CG)3-(A)6	coding
Leptolyngbya sp. FACHB-238	160	89897	89916	A-A	2	12	8	(A)6-(A)6	noncoding
Leptolyngbya sp. FACHB-238	161	95567	95586	GA-T	2	12	8	(GA)3-(T)6	coding
Leptolyngbya sp. FACHB-238	162	104036	104053	T-TC	2	13	5	(T)7-(TC)3	coding
Leptolyngbya sp. FACHB-238	163	126757	126774	TC-GA	2	14	4	(TC)4-(GA)3	noncoding
Leptolyngbya sp. FACHB-238	164	126797	126812	T-T	2	12	4	(T)6-(T)6	noncoding
Leptolyngbya sp. FACHB-238	165	128873	128891	AG-CA	2	12	7	(AG)3-(CA)3	coding
Leptolyngbya sp. FACHB-238	166	137361	137373	CA-GA	2	12	1	(CA)3-(GA)3	coding
Leptolyngbya sp. FACHB-238	167	147016	147037	TC-CT	2	12	10	(TC)3-(CT)3	coding
Leptolyngbya sp. FACHB-238	168	8818	8833	GT-A	2	13	3	(GT)3-(A)7	noncoding
Leptolyngbya sp. FACHB-238	169	15625	15642	A-A	2	12	6	(A)6-(A)6	coding
Leptolyngbya sp. FACHB-238	170	19734	19753	A-CG	2	12	8	(A)6-(CG)3	coding
Leptolyngbya sp. FACHB-238	171	37464	37484	A-T	2	12	9	(A)6-(T)6	coding
Leptolyngbya sp. FACHB-238	172	42920	42952	T-C-C	3	18	15	(T)6-(C)6-(C)6	noncoding
Leptolyngbya sp. FACHB-238	173	43925	43943	CG-ATT	2	15	4	(CG)3-(ATT)3	coding
Leptolyngbya sp. FACHB-238	174	47958	47974	C-C	2	12	5	(C)6-(C)6	noncoding
Leptolyngbya sp. FACHB-238	175	48592	48613	GA-T	2	12	10	(GA)3-(T)6	noncoding
Leptolyngbya sp. FACHB-238	176	68087	68099	CT-T	2	12	1	(CT)3-(T)6	noncoding
Leptolyngbya sp. FACHB-238	177	98297	98317	A-AG	2	12	9	(A)6-(AG)3	noncoding
Leptolyngbya sp. FACHB-238	178	102777	102789	GC-AG	2	12	1	(GC)3-(AG)3	coding
Leptolyngbya sp. FACHB-238	179	104391	104412	TG-AG	2	14	8	(TG)3-(AG)4	noncoding
Leptolyngbya sp. FACHB-238	180	124109	124131	TTCC-G	2	18	5	(TTCC)3-(G)6	noncoding
Leptolyngbya sp. FACHB-238	181	137657	137674	TC-A	2	12	6	(TC)3-(A)6	noncoding
Leptolyngbya sp. FACHB-238	182	10953	10965	T-GA	2	12	1	(T)6-(GA)3	coding
Leptolyngbya sp. FACHB-238	183	14162	14185	GT-CT	2	14	10	(GT)3-(CT)4	coding
Leptolyngbya sp. FACHB-238	184	15912	15929	GAA-A	2	15	3	(GAA)3-(A)6	coding
Leptolyngbya sp. FACHB-238	185	79900	79926	ATG-ACG	2	18	9	(ATG)3-(ACG)3	coding
Leptolyngbya sp. FACHB-238	186	100259	100277	GTG-CAG	2	18	1	(GTG)3-(CAG)3	coding
Leptolyngbya sp. FACHB-238	187	117126	117149	A-AAG	2	15	9	(A)6-(AAG)3	coding
Leptolyngbya sp. FACHB-238	188	10006	10017	CA-AG	2	12	0	(CA)3-(AG)3	coding
Leptolyngbya sp. FACHB-238	189	10108	10125	T-AG	2	13	5	(T)7-(AG)3	noncoding
Leptolyngbya sp. FACHB-238	190	31655	31669	TTG-GA	2	15	0	(TTG)3-(GA)3	noncoding
Leptolyngbya sp. FACHB-238	191	47925	47946	GT-CT	2	12	10	(GT)3-(CT)3	coding
Leptolyngbya sp. FACHB-238	192	66847	66868	CG-A	2	12	10	(CG)3-(A)6	coding
Leptolyngbya sp. FACHB-238	193	82239	82259	GC-A	2	12	9	(GC)3-(A)6	coding
Leptolyngbya sp. FACHB-238	194	96653	96668	AT-A	2	14	2	(AT)3-(A)8	noncoding
Leptolyngbya sp. FACHB-238	195	103095	103112	AG-GT	2	14	4	(AG)3-(GT)4	coding
Leptolyngbya sp. FACHB-238	196	112777	112802	CTG-GCA	2	18	8	(CTG)3-(GCA)3	coding
Leptolyngbya sp. FACHB-238	197	13911	13943	A-AC-AT	3	20	13	(A)6-(AC)3-(AT)4	noncoding
Leptolyngbya sp. FACHB-238	198	19349	19369	T-CG	2	12	9	(T)6-(CG)3	coding
Leptolyngbya sp. FACHB-238	199	43913	43936	GC-TG	2	14	10	(GC)4-(TG)3	coding
Leptolyngbya sp. FACHB-238	200	83121	83134	A-GC	2	12	2	(A)6-(GC)3	coding
Leptolyngbya sp. FACHB-238	201	97735	97757	GCA-GA	2	17	6	(GCA)3-(GA)4	coding
Leptolyngbya sp. FACHB-238	202	1347	1361	AG-CT	2	12	3	(AG)3-(CT)3	coding
Leptolyngbya sp. FACHB-238	203	3189	3210	A-AC	2	12	10	(A)6-(AC)3	coding
Leptolyngbya sp. FACHB-238	204	61286	61299	A-C	2	12	2	(A)6-(C)6	coding
Leptolyngbya sp. FACHB-238	205	67668	67686	CT-A	2	12	7	(CT)3-(A)6	coding
Leptolyngbya sp. FACHB-238	206	76785	76802	A-GGC	2	16	2	(A)7-(GGC)3	coding
Leptolyngbya sp. FACHB-238	207	96520	96542	GTT-GA	2	15	8	(GTT)3-(GA)3	coding
Leptolyngbya sp. FACHB-238	208	107246	107259	T-AC	2	13	1	(T)7-(AC)3	coding
Leptolyngbya sp. FACHB-238	209	109040	109052	AG-A	2	12	1	(AG)3-(A)6	noncoding
Leptolyngbya sp. FACHB-238	210	126566	126585	A-GT	2	12	8	(A)6-(GT)3	coding
Leptolyngbya sp. FACHB-238	211	172342	172363	AG-GA	2	12	10	(AG)3-(GA)3	noncoding
Leptolyngbya sp. FACHB-238	212	175198	175215	T-TGC	2	16	2	(T)7-(TGC)3	coding
Leptolyngbya sp. FACHB-238	213	186689	186707	T-TC	2	12	7	(T)6-(TC)3	noncoding
Leptolyngbya sp. FACHB-238	214	194838	194859	CT-T	2	12	10	(CT)3-(T)6	coding
Leptolyngbya sp. FACHB-238	215	204189	204201	AG-TC	2	12	1	(AG)3-(TC)3	coding
Leptolyngbya sp. FACHB-238	216	215047	215061	T-A	2	12	3	(T)6-(A)6	coding
Leptolyngbya sp. FACHB-238	217	236022	236038	TG-G	2	12	5	(TG)3-(G)6	coding
Leptolyngbya sp. FACHB-238	218	238379	238399	CG-AC	2	14	7	(CG)4-(AC)3	coding
Leptolyngbya sp. FACHB-238	219	251169	251191	CG-CTG	2	15	8	(CG)3-(CTG)3	coding
Leptolyngbya sp. FACHB-238	220	271964	271979	GC-CT	2	12	4	(GC)3-(CT)3	coding
Leptolyngbya sp. FACHB-238	221	291906	291921	T-A	2	12	4	(T)6-(A)6	noncoding
Leptolyngbya sp. FACHB-238	222	329591	329609	GA-CAT	2	15	4	(GA)3-(CAT)3	coding
Leptolyngbya sp. FACHB-238	223	351356	351377	A-A	2	15	7	(A)6-(A)9	noncoding
Leptolyngbya sp. FACHB-238	224	357467	357482	GA-AT	2	12	4	(GA)3-(AT)3	coding
Leptolyngbya sp. FACHB-238	225	378372	378386	AG-T	2	12	3	(AG)3-(T)6	coding
Leptolyngbya sp. FACHB-238	226	391707	391727	TTG-TTG	2	18	3	(TTG)3-(TTG)3	coding
Leptolyngbya sp. FACHB-238	227	400224	400241	CG-CT	2	12	6	(CG)3-(CT)3	coding
Leptolyngbya sp. FACHB-238	228	403312	403334	GT-CAA	2	15	8	(GT)3-(CAA)3	coding
Leptolyngbya sp. FACHB-238	229	427169	427220	AC-AC-AC-AC-AC	5	40	12	(AC)4-(AC)4-(AC)4-(AC)4-(AC)4	noncoding
Leptolyngbya sp. FACHB-238	230	430391	430409	C-TC	2	12	7	(C)6-(TC)3	coding
Leptolyngbya sp. FACHB-238	231	433833	433854	G-C	2	17	5	(G)8-(C)9	noncoding
Leptolyngbya sp. FACHB-238	232	445926	445942	TC-CT	2	12	5	(TC)3-(CT)3	coding
Leptolyngbya sp. FACHB-238	233	469531	469548	C-G	2	12	6	(C)6-(G)6	noncoding
Leptolyngbya sp. FACHB-238	234	27483	27496	CG-CT	2	12	2	(CG)3-(CT)3	noncoding
Leptolyngbya sp. FACHB-238	235	61242	61256	A-C	2	13	2	(A)7-(C)6	coding
Leptolyngbya sp. FACHB-238	236	64383	64403	CT-A	2	12	9	(CT)3-(A)6	coding
Leptolyngbya sp. FACHB-238	237	66078	66110	TC-CG-AT	3	18	15	(TC)3-(CG)3-(AT)3	coding
Leptolyngbya sp. FACHB-238	238	71291	71309	A-CT	2	12	7	(A)6-(CT)3	noncoding
Leptolyngbya sp. FACHB-238	239	85167	85184	A-AG	2	12	6	(A)6-(AG)3	noncoding
Leptolyngbya sp. FACHB-238	240	94981	94998	A-CG	2	12	6	(A)6-(CG)3	coding
Leptolyngbya sp. FACHB-238	241	102331	102345	CT-TC	2	12	3	(CT)3-(TC)3	coding
Leptolyngbya sp. FACHB-238	242	109069	109081	A-TC	2	12	1	(A)6-(TC)3	coding
Leptolyngbya sp. FACHB-238	243	120883	120903	TC-T	2	12	9	(TC)3-(T)6	noncoding
Leptolyngbya sp. FACHB-238	244	10998	11021	CGA-GA	2	15	9	(CGA)3-(GA)3	coding
Leptolyngbya sp. FACHB-238	245	42329	42347	T-AT	2	13	6	(T)7-(AT)3	noncoding
Leptolyngbya sp. FACHB-238	246	45572	45593	GC-AG	2	12	10	(GC)3-(AG)3	coding
Leptolyngbya sp. FACHB-238	247	52148	52188	T-A-TC-T	4	24	17	(T)6-(A)6-(TC)3-(T)6	noncoding
Leptolyngbya sp. FACHB-238	248	99459	99471	A-TC	2	12	1	(A)6-(TC)3	noncoding
Leptolyngbya sp. FACHB-238	249	100989	101004	A-AC	2	12	4	(A)6-(AC)3	coding
Leptolyngbya sp. FACHB-238	250	108651	108669	A-CT	2	12	7	(A)6-(CT)3	noncoding
Leptolyngbya sp. FACHB-238	251	394	418	A-ATG	2	15	10	(A)6-(ATG)3	noncoding
Leptolyngbya sp. FACHB-238	252	6760	6779	CAA-GA	2	15	5	(CAA)3-(GA)3	coding
Leptolyngbya sp. FACHB-238	253	21993	22012	GT-T	2	13	7	(GT)3-(T)7	noncoding
Leptolyngbya sp. FACHB-238	254	38147	38159	CG-T	2	12	1	(CG)3-(T)6	noncoding
Leptolyngbya sp. FACHB-238	255	46937	46953	A-TG	2	13	4	(A)7-(TG)3	noncoding
Leptolyngbya sp. FACHB-238	256	57909	57928	A-AG	2	12	8	(A)6-(AG)3	noncoding
Leptolyngbya sp. FACHB-238	257	79754	79769	TC-AG	2	14	2	(TC)3-(AG)4	coding
Leptolyngbya sp. FACHB-238	258	87136	87155	A-TG	2	12	8	(A)6-(TG)3	noncoding
Leptolyngbya sp. FACHB-238	259	93312	93327	T-TC	2	12	4	(T)6-(TC)3	coding
Leptolyngbya sp. FACHB-238	260	1607	1625	T-TCT	2	15	4	(T)6-(TCT)3	coding
Leptolyngbya sp. FACHB-238	261	28752	28772	TGT-TG	2	15	6	(TGT)3-(TG)3	noncoding
Leptolyngbya sp. FACHB-238	262	42772	42789	G-G	2	12	6	(G)6-(G)6	coding
Leptolyngbya sp. FACHB-238	263	49506	49525	GA-T	2	12	8	(GA)3-(T)6	coding
Leptolyngbya sp. FACHB-238	264	57508	57529	T-TC	2	12	10	(T)6-(TC)3	noncoding
Leptolyngbya sp. FACHB-238	265	59931	59945	CT-GC	2	12	3	(CT)3-(GC)3	coding
Leptolyngbya sp. FACHB-238	266	69453	69471	GA-T	2	12	7	(GA)3-(T)6	coding
Leptolyngbya sp. FACHB-238	267	70128	70145	TC-TC	2	12	6	(TC)3-(TC)3	coding
Leptolyngbya sp. FACHB-238	268	6781	6798	A-CG	2	12	6	(A)6-(CG)3	coding
Leptolyngbya sp. FACHB-238	269	19944	19960	T-A	2	12	5	(T)6-(A)6	coding
Leptolyngbya sp. FACHB-238	270	20568	20584	CT-A	2	12	5	(CT)3-(A)6	coding
Leptolyngbya sp. FACHB-238	271	22344	22357	GA-GC	2	12	2	(GA)3-(GC)3	coding
Leptolyngbya sp. FACHB-238	272	47330	47343	T-C	2	12	2	(T)6-(C)6	coding
Leptolyngbya sp. FACHB-238	273	73052	73071	CTG-TC	2	15	5	(CTG)3-(TC)3	coding
Leptolyngbya sp. FACHB-238	274	2588	2609	CA-A	2	12	10	(CA)3-(A)6	noncoding
Leptolyngbya sp. FACHB-238	275	20714	20727	T-TC	2	12	2	(T)6-(TC)3	coding
Leptolyngbya sp. FACHB-238	276	24736	24757	T-T	2	12	10	(T)6-(T)6	coding
Leptolyngbya sp. FACHB-238	277	37935	37956	TA-AT	2	12	10	(TA)3-(AT)3	coding
Leptolyngbya sp. FACHB-238	278	54585	54597	A-CA	2	12	1	(A)6-(CA)3	coding
Leptolyngbya sp. FACHB-238	279	59786	59804	T-A	2	13	6	(T)6-(A)7	coding
Leptolyngbya sp. FACHB-238	280	81134	81156	TCT-AG	2	15	8	(TCT)3-(AG)3	coding
Leptolyngbya sp. FACHB-238	281	83233	83252	GA-A	2	12	8	(GA)3-(A)6	noncoding
Leptolyngbya sp. FACHB-238	282	39	53	T-TC	2	12	3	(T)6-(TC)3	noncoding
Leptolyngbya sp. FACHB-238	283	42599	42617	TG-A	2	13	6	(TG)3-(A)7	noncoding
Leptolyngbya sp. FACHB-238	284	52382	52396	T-T	2	12	3	(T)6-(T)6	coding
Leptolyngbya sp. FACHB-238	285	60406	60423	CAT-CCA	2	18	0	(CAT)3-(CCA)3	coding
Leptolyngbya sp. FACHB-238	286	65934	65946	T-G	2	12	1	(T)6-(G)6	coding
Leptolyngbya sp. FACHB-238	287	77297	77314	CT-C	2	12	6	(CT)3-(C)6	coding
Leptolyngbya sp. FACHB-238	288	82797	82808	T-CG	2	12	0	(T)6-(CG)3	coding
Leptolyngbya sp. FACHB-238	289	87295	87309	GA-A	2	12	3	(GA)3-(A)6	noncoding
Leptolyngbya sp. FACHB-238	290	28223	28243	C-GA	2	12	9	(C)6-(GA)3	coding
Leptolyngbya sp. FACHB-238	291	37517	37533	TC-GC	2	14	3	(TC)3-(GC)4	coding
Leptolyngbya sp. FACHB-238	292	45687	45702	C-TC	2	14	2	(C)8-(TC)3	coding
Leptolyngbya sp. FACHB-238	293	70783	70796	T-TA	2	12	2	(T)6-(TA)3	noncoding
Leptolyngbya sp. FACHB-238	294	3893	3914	A-GT	2	12	10	(A)6-(GT)3	noncoding
Leptolyngbya sp. FACHB-238	295	21403	21415	T-A	2	12	1	(T)6-(A)6	noncoding
Leptolyngbya sp. FACHB-238	296	34457	34468	TC-T	2	12	0	(TC)3-(T)6	coding
Leptolyngbya sp. FACHB-238	297	63316	63332	CG-A	2	14	3	(CG)4-(A)6	coding
Leptolyngbya sp. FACHB-238	298	4067	4085	T-T	2	12	7	(T)6-(T)6	coding
Leptolyngbya sp. FACHB-238	299	4877	4905	CT-G-G	3	18	11	(CT)3-(G)6-(G)6	coding
Leptolyngbya sp. FACHB-238	300	22451	22478	ATCA-AC	2	18	10	(ATCA)3-(AC)3	coding
Leptolyngbya sp. FACHB-238	301	33782	33801	CTT-C	2	15	5	(CTT)3-(C)6	coding
Leptolyngbya sp. FACHB-238	302	35430	35450	GC-AG-TC	3	18	3	(GC)3-(AG)3-(TC)3	coding
Leptolyngbya sp. FACHB-238	303	46863	46877	CG-TAA	2	15	0	(CG)3-(TAA)3	coding
Leptolyngbya sp. FACHB-238	304	75868	75880	TG-AT	2	12	1	(TG)3-(AT)3	noncoding
Leptolyngbya sp. FACHB-238	305	15474	15491	A-GA	2	12	6	(A)6-(GA)3	coding
Leptolyngbya sp. FACHB-238	306	28421	28440	A-TC	2	12	8	(A)6-(TC)3	noncoding
Leptolyngbya sp. FACHB-238	307	39680	39700	GA-A	2	15	6	(GA)4-(A)7	coding
Leptolyngbya sp. FACHB-238	308	89014	89031	AT-T	2	12	6	(AT)3-(T)6	coding
Leptolyngbya sp. FACHB-238	309	107564	107575	T-C	2	12	0	(T)6-(C)6	coding
Leptolyngbya sp. FACHB-238	310	111929	111951	A-A	2	15	8	(A)9-(A)6	noncoding
Leptolyngbya sp. FACHB-238	311	133460	133476	A-TC	2	12	5	(A)6-(TC)3	coding
Leptolyngbya sp. FACHB-238	312	145135	145156	A-GC	2	12	10	(A)6-(GC)3	noncoding
Leptolyngbya sp. FACHB-238	313	165365	165390	AGG-CGC	2	18	8	(AGG)3-(CGC)3	coding
Leptolyngbya sp. FACHB-238	314	181181	181207	T-T-A	3	19	8	(T)6-(T)7-(A)6	noncoding
Leptolyngbya sp. FACHB-238	315	213538	213557	AGC-GCA	2	18	2	(AGC)3-(GCA)3	coding
Leptolyngbya sp. FACHB-238	316	243588	243604	A-A	2	12	5	(A)6-(A)6	noncoding
Leptolyngbya sp. FACHB-238	317	244727	244742	AAT-A	2	15	1	(AAT)3-(A)6	noncoding
Leptolyngbya sp. FACHB-238	318	261979	261993	A-CTG	2	15	0	(A)6-(CTG)3	coding
Leptolyngbya sp. FACHB-238	319	270867	270881	A-A	2	12	3	(A)6-(A)6	noncoding
Leptolyngbya sp. FACHB-238	320	276329	276351	T-CAT	2	15	8	(T)6-(CAT)3	coding
Leptolyngbya sp. FACHB-238	321	284166	284194	A-TC-CA	3	18	11	(A)6-(TC)3-(CA)3	noncoding
Leptolyngbya sp. FACHB-238	322	309966	309983	CAG-AG	2	15	3	(CAG)3-(AG)3	coding
Leptolyngbya sp. FACHB-238	323	318651	318671	AT-A	2	12	9	(AT)3-(A)6	coding
Leptolyngbya sp. FACHB-238	324	360702	360718	CT-TGC	2	15	2	(CT)3-(TGC)3	coding
Leptolyngbya sp. FACHB-238	325	410897	410909	TG-AT	2	12	1	(TG)3-(AT)3	noncoding
Leptolyngbya sp. FACHB-238	326	26992	27006	T-GC	2	12	3	(T)6-(GC)3	coding
Leptolyngbya sp. FACHB-238	327	31657	31670	TC-CT	2	12	2	(TC)3-(CT)3	coding
Leptolyngbya sp. FACHB-238	328	32987	33000	TC-TC	2	12	2	(TC)3-(TC)3	noncoding
Leptolyngbya sp. FACHB-238	329	53897	53912	TG-TA	2	12	4	(TG)3-(TA)3	coding
Leptolyngbya sp. FACHB-238	330	68347	68366	TC-A	2	12	8	(TC)3-(A)6	coding
Leptolyngbya sp. FACHB-238	331	12557	12577	AGC-AGC	2	18	3	(AGC)3-(AGC)3	coding
Leptolyngbya sp. FACHB-238	332	24010	24030	AAC-ATA	2	18	3	(AAC)3-(ATA)3	coding
Leptolyngbya sp. FACHB-238	333	28332	28348	A-A	2	13	4	(A)6-(A)7	noncoding
Leptolyngbya sp. FACHB-238	334	23518	23539	TC-CT	2	12	10	(TC)3-(CT)3	coding
Leptolyngbya sp. FACHB-238	335	49336	49357	TA-TC	2	12	10	(TA)3-(TC)3	noncoding
Leptolyngbya sp. FACHB-238	336	56782	56794	TG-A	2	12	1	(TG)3-(A)6	noncoding
Leptolyngbya sp. FACHB-238	337	39	53	T-TC	2	12	3	(T)6-(TC)3	noncoding
Leptolyngbya sp. FACHB-238	338	18197	18218	AT-CT	2	12	10	(AT)3-(CT)3	coding
Leptolyngbya sp. FACHB-238	339	54147	54163	T-A	2	12	5	(T)6-(A)6	noncoding
Leptolyngbya sp. FACHB-238	340	3359	3375	TC-A	2	12	5	(TC)3-(A)6	noncoding
Leptolyngbya sp. FACHB-238	341	4067	4086	T-AT	2	12	8	(T)6-(AT)3	coding
Leptolyngbya sp. FACHB-238	342	7687	7707	TCA-T	2	15	6	(TCA)3-(T)6	noncoding
Leptolyngbya sp. FACHB-238	343	7811	7824	GA-TC	2	12	2	(GA)3-(TC)3	noncoding
Leptolyngbya sp. FACHB-238	344	21181	21194	AG-GA	2	12	2	(AG)3-(GA)3	coding
Leptolyngbya sp. FACHB-238	345	30396	30408	T-A	2	12	1	(T)6-(A)6	noncoding
Leptolyngbya sp. FACHB-238	346	47013	47029	T-AT	2	13	4	(T)7-(AT)3	noncoding
Leptolyngbya sp. FACHB-238	347	54604	54632	C-C-C	3	19	10	(C)6-(C)7-(C)6	coding
Leptolyngbya sp. FACHB-238	348	5794	5812	C-AG	2	14	5	(C)8-(AG)3	noncoding
Leptolyngbya sp. FACHB-238	349	9755	9779	TGA-AG	2	15	10	(TGA)3-(AG)3	coding
Leptolyngbya sp. FACHB-238	350	33096	33113	CA-CT	2	14	4	(CA)4-(CT)3	noncoding
Leptolyngbya sp. FACHB-238	351	45997	46015	T-GT	2	12	7	(T)6-(GT)3	coding
Leptolyngbya sp. FACHB-238	352	48427	48446	T-GA	2	12	8	(T)6-(GA)3	noncoding
Leptolyngbya sp. FACHB-238	353	502	539	GA-T-A	3	20	18	(GA)3-(T)8-(A)6	coding
Leptolyngbya sp. FACHB-238	354	6821	6842	CGA-AAG	2	18	4	(CGA)3-(AAG)3	coding
Leptolyngbya sp. FACHB-238	355	11817	11830	CG-AG	2	12	2	(CG)3-(AG)3	coding
Leptolyngbya sp. FACHB-238	356	34395	34412	CG-T	2	12	6	(CG)3-(T)6	coding
Leptolyngbya sp. FACHB-238	357	37215	37232	CT-TCCT	2	18	0	(CT)3-(TCCT)3	coding
Leptolyngbya sp. FACHB-238	358	30085	30106	T-CT	2	12	10	(T)6-(CT)3	coding
Leptolyngbya sp. FACHB-238	359	39189	39203	TC-CG	2	12	3	(TC)3-(CG)3	coding
Leptolyngbya sp. FACHB-238	360	40969	40994	A-T-AC	3	19	7	(A)6-(T)7-(AC)3	coding
Leptolyngbya sp. FACHB-238	361	3425	3446	GA-T	2	12	10	(GA)3-(T)6	noncoding
Leptolyngbya sp. FACHB-238	362	8820	8859	A-A-CT-A	4	27	13	(A)6-(A)8-(CT)3-(A)7	noncoding
Leptolyngbya sp. FACHB-238	363	8893	8919	AG-TTC-TTC	3	24	3	(AG)3-(TTC)3-(TTC)3	coding
Leptolyngbya sp. FACHB-238	364	51707	51728	AG-CG	2	12	10	(AG)3-(CG)3	noncoding
Leptolyngbya sp. FACHB-238	365	60973	60990	CA-CCG	2	17	1	(CA)4-(CCG)3	coding
Leptolyngbya sp. FACHB-238	366	94097	94113	GA-AG	2	14	3	(GA)3-(AG)4	coding
Leptolyngbya sp. FACHB-238	367	95478	95490	AC-T	2	12	1	(AC)3-(T)6	coding
Leptolyngbya sp. FACHB-238	368	108354	108370	GA-G	2	12	5	(GA)3-(G)6	noncoding
Leptolyngbya sp. FACHB-238	369	136168	136185	T-T	2	12	6	(T)6-(T)6	coding
Leptolyngbya sp. FACHB-238	370	137190	137206	GC-AG	2	12	5	(GC)3-(AG)3	coding
Leptolyngbya sp. FACHB-238	371	138100	138116	CT-TC	2	16	1	(CT)4-(TC)4	noncoding
Leptolyngbya sp. FACHB-238	372	146217	146232	T-A	2	12	4	(T)6-(A)6	coding
Leptolyngbya sp. FACHB-238	373	150826	150839	CG-CT	2	12	2	(CG)3-(CT)3	coding
Leptolyngbya sp. FACHB-238	374	157643	157664	CA-A	2	12	10	(CA)3-(A)6	coding
Leptolyngbya sp. FACHB-238	375	178336	178347	CT-CA	2	12	0	(CT)3-(CA)3	noncoding
Leptolyngbya sp. FACHB-238	376	183621	183640	G-AG	2	12	8	(G)6-(AG)3	coding
Leptolyngbya sp. FACHB-238	377	185412	185433	A-T	2	14	8	(A)7-(T)7	noncoding
Leptolyngbya sp. FACHB-238	378	192606	192649	GA-A-TC-TA	4	24	20	(GA)3-(A)6-(TC)3-(TA)3	noncoding
Leptolyngbya sp. FACHB-238	379	199368	199382	AGC-GA	2	15	0	(AGC)3-(GA)3	coding
Leptolyngbya sp. FACHB-238	380	223301	223322	TG-T	2	12	10	(TG)3-(T)6	coding
Leptolyngbya sp. FACHB-238	381	226386	226399	TG-GA	2	12	2	(TG)3-(GA)3	noncoding
Leptolyngbya sp. FACHB-238	382	232569	232593	GTT-T	2	15	10	(GTT)3-(T)6	coding
Leptolyngbya sp. FACHB-238	383	241011	241031	A-CA	2	12	9	(A)6-(CA)3	noncoding
Leptolyngbya sp. FACHB-238	384	241235	241261	AAG-ATC	2	18	9	(AAG)3-(ATC)3	coding
Leptolyngbya sp. FACHB-238	385	244114	244133	TC-TC	2	12	8	(TC)3-(TC)3	coding
Leptolyngbya sp. FACHB-238	386	247314	247334	A-CT	2	12	9	(A)6-(CT)3	noncoding
Leptolyngbya sp. FACHB-238	387	337733	337746	GA-TC	2	12	2	(GA)3-(TC)3	noncoding
Leptolyngbya sp. FACHB-238	388	11244	11264	CG-AT	2	12	9	(CG)3-(AT)3	coding
Leptolyngbya sp. FACHB-238	389	17861	17882	CG-GC	2	12	10	(CG)3-(GC)3	coding
Leptolyngbya sp. FACHB-238	390	17822	17842	TAC-A	2	15	6	(TAC)3-(A)6	coding
Leptolyngbya sp. FACHB-238	391	18092	18116	TA-AGC	2	15	10	(TA)3-(AGC)3	coding
Leptolyngbya sp. FACHB-238	392	20121	20150	GA-A-CG	3	19	11	(GA)3-(A)7-(CG)3	coding
Leptolyngbya sp. FACHB-238	393	41280	41294	GA-A	2	12	3	(GA)3-(A)6	noncoding
Leptolyngbya sp. FACHB-238	394	39	53	T-TC	2	12	3	(T)6-(TC)3	noncoding
Leptolyngbya sp. FACHB-238	395	1834	1848	T-A	2	14	1	(T)6-(A)8	noncoding
Leptolyngbya sp. FACHB-238	396	2246	2260	TG-CG	2	12	3	(TG)3-(CG)3	coding
Leptolyngbya sp. FACHB-238	397	17890	17907	GA-T	2	12	6	(GA)3-(T)6	coding
Leptolyngbya sp. FACHB-238	398	30917	30940	CTG-CAA	2	18	6	(CTG)3-(CAA)3	coding
Leptolyngbya sp. FACHB-238	399	16038	16061	TG-TGC	2	15	9	(TG)3-(TGC)3	coding
Leptolyngbya sp. FACHB-238	400	37252	37265	A-T	2	12	2	(A)6-(T)6	noncoding
Leptolyngbya sp. FACHB-238	401	5313	5332	TC-TAG	2	15	5	(TC)3-(TAG)3	coding
Leptolyngbya sp. FACHB-238	402	12195	12207	T-GC	2	12	1	(T)6-(GC)3	coding
Leptolyngbya sp. FACHB-238	403	24398	24417	GA-GA	2	12	8	(GA)3-(GA)3	coding
Leptolyngbya sp. FACHB-238	404	24969	24990	T-AC	2	12	10	(T)6-(AC)3	noncoding
Leptolyngbya sp. FACHB-238	405	4643	4657	TCA-A	2	15	0	(TCA)3-(A)6	coding
Leptolyngbya sp. FACHB-238	406	12805	12826	GA-AAG	2	15	7	(GA)3-(AAG)3	coding
Leptolyngbya sp. FACHB-238	407	7761	7779	CG-A	2	13	6	(CG)3-(A)7	coding
Leptolyngbya sp. FACHB-238	408	5358	5369	TC-A	2	12	0	(TC)3-(A)6	coding
Leptolyngbya sp. FACHB-238	409	13130	13148	T-ATT	2	15	4	(T)6-(ATT)3	noncoding
Leptolyngbya sp. FACHB-238	410	18601	18614	TG-G	2	12	2	(TG)3-(G)6	coding
Leptolyngbya sp. FACHB-238	411	1305	1319	T-GCA	2	15	0	(T)6-(GCA)3	coding
Leptolyngbya sp. FACHB-238	412	15030	15046	GTG-GA	2	15	2	(GTG)3-(GA)3	coding
Leptolyngbya sp. FACHB-238	413	23672	23693	TTG-T	2	16	6	(TTG)3-(T)7	coding
Leptolyngbya sp. FACHB-238	414	53885	53899	CA-T	2	12	3	(CA)3-(T)6	coding
Leptolyngbya sp. FACHB-238	415	61405	61419	TG-T	2	12	3	(TG)3-(T)6	noncoding
Leptolyngbya sp. FACHB-238	416	95167	95206	T-AC-A-AT	4	25	15	(T)7-(AC)3-(A)6-(AT)3	noncoding
Leptolyngbya sp. FACHB-238	417	95951	95970	A-CCA	2	16	4	(A)7-(CCA)3	coding
Leptolyngbya sp. FACHB-238	418	102131	102152	T-AG	2	14	8	(T)6-(AG)4	noncoding
Leptolyngbya sp. FACHB-238	419	106214	106235	T-GC	2	12	10	(T)6-(GC)3	coding
Leptolyngbya sp. FACHB-238	420	125885	125898	TA-TA	2	12	2	(TA)3-(TA)3	noncoding
Leptolyngbya sp. FACHB-238	421	132234	132251	T-A	2	13	5	(T)6-(A)7	noncoding
Leptolyngbya sp. FACHB-238	422	149776	149789	T-GA	2	13	1	(T)7-(GA)3	coding
Leptolyngbya sp. FACHB-238	423	156841	156861	CT-T	2	12	9	(CT)3-(T)6	noncoding
Leptolyngbya sp. FACHB-238	424	169217	169231	AG-TCG	2	15	0	(AG)3-(TCG)3	coding
Leptolyngbya sp. FACHB-238	425	196460	196472	GA-AG	2	12	1	(GA)3-(AG)3	coding
Leptolyngbya sp. FACHB-238	426	204112	204132	TC-TC	2	12	9	(TC)3-(TC)3	noncoding
Leptolyngbya sp. FACHB-238	427	216846	216859	TA-CT	2	12	2	(TA)3-(CT)3	coding
Leptolyngbya sp. FACHB-238	428	238494	238513	GC-AGA	2	15	5	(GC)3-(AGA)3	coding
Leptolyngbya sp. FACHB-238	429	244244	244255	GA-A	2	12	0	(GA)3-(A)6	noncoding
Leptolyngbya sp. FACHB-238	430	247546	247571	GCA-TC	2	18	8	(GCA)4-(TC)3	coding
Leptolyngbya sp. FACHB-238	431	248305	248329	CGA-T	2	15	10	(CGA)3-(T)6	coding
Leptolyngbya sp. FACHB-238	432	255589	255606	A-AG	2	12	6	(A)6-(AG)3	coding
Leptolyngbya sp. FACHB-238	433	272861	272880	AC-CG	2	12	8	(AC)3-(CG)3	coding
Leptolyngbya sp. FACHB-238	434	274543	274555	A-CG	2	12	1	(A)6-(CG)3	coding
Leptolyngbya sp. FACHB-238	435	283677	283691	T-TC	2	13	2	(T)7-(TC)3	noncoding
[truncated: 22,705 more rows]

## Sheet: Table S5
Table S5 Unique motifs of CSSR identified in each genome.
Leptolyngbya sp. FACHB-402	Leptolyngbya boryana dg5	Leptolyngbya sp. FACHB-239	Leptolyngbya sp. FACHB-238	Leptolyngbya boryana IAM M-101	Leptolyngbya sp. FACHB-161	Leptolyngbya boryana PCC 6306	Leptolyngbya boryana NIES-2135	Leptolyngbya sp. UWPOB_LEPTO1	Leptolyngbya sp. FACHB-1624	Leptolyngbya sp. FACHB-17	Leptolyngbya sp. NIES-2104	Leptolyngbya sp. NIES-3755	Leptolyngbya sp. FACHB-321	Leptolyngbya sp. isolate ULC077bin1	Leptolyngbya sp. 'hensonii'	Leptolyngbya sp. FACHB-8	Leptolyngbya sp. FACHB-16	Leptolyngbya ohadii IS1	Leptolyngbya sp. JSC-1	Leptolyngbya sp. IPPAS B-1204	Leptolyngbya sp. DLM2.Bin15	Leptolyngbya sp. CCY15150	Leptolyngbya cf. ectocarpi LEGE 11479	Leptolyngbya sp. Heron Island J	Leptolyngbya sp. SIO4C1	Leptolyngbya sp. BC1307	Leptolyngbya foveolarum ULC129bin1	Leptolyngbya sp. SIO1E4	Leptolyngbya sp. SIO1D8	Leptolyngbya sp. SIOISBB	Leptolyngbya sp. RL_3_1	Leptolyngbya sp. LCM1.Bin17	Leptolyngbya sp. BL0902	Leptolyngbya sp. KIOST-1	Leptolyngbya sp. isolate ULC186bin1	Leptolyngbya sp. FACHB-60	Leptolyngbya sp. DLM2.Bin27	Leptolyngbya sp. isolate ULC073bin1	Leptolyngbya antarctica ULC041bin1	Leptolyngbya sp. 7M	Leptolyngbya sp. AVDCRST_MAG94	Leptolyngbya sp. ES-bin-22	Leptolyngbya sp. FACHB-711	Leptolyngbya sp. SIO3F4	Leptolyngbya sp. SIO4C5
\	\	\	\	\	\	TG-A-T	\	TG-TAG	GA-TAT	AATC-T	CT-AATC	CTT-GA	AGCC-GA	CA-TAT	CGA-G	A-GT-T	TGC-TA	G-TCT	GGC-GT	T-TTC-TA	C-C-C-C-G	CTCTGG-TGTCGA	TA-TGA	AT-GAT-T	CAG-TGC	CAA-T-GC	TCG-TCG-TCG-TCG	GC-T-T	GATT-TTG	GGC-CAG	ATC-G	CA-CGG	T-GTC-CT	TGG-GGT	TC-AGG	GGT-CTG	AATT-T-AT	TC-A-A	GC-CCTGGC	CA-CGA	ACT-CAT	T-A-AT	A-TG-A	CT-GA-AT	TAC-GA
								TC-CT-TC-CT	A-GAA-CAG	GGATTA-CG	ATC-CA	T-AG-AGT	GTT-TGC	GGA-TCC-T	CAA-CAG	CG-GAG	CT-GT-AC	GGGT-AG	T-AC-T	TG-GA-GGC	TTG-GTC	CTG-GCG-CGG	CTG-GTG	TC-AT-AT	GA-GCT-A	AGC-TCGGC	TG-CCT	A-TTTG	AG-CT-T	A-AAGC	TG-TG-AG	G-G-GT	GAC-GA	AG-TCT	TGG-GGT-GCG	CGG-CCA	ACCC-CAG	CGC-GCG	AG-TGGG	GAA-CG	CTA-T	GCT-CAT	AATC-C	TAG-ATG	GGT-GTG
								GT-TCT	ATG-AT	GGC-AAG	T-AG-A	AT-CA-A	ATG-GT	TC-TCA	ATAG-AT	AC-CACC	AAC-TTG	G-AAT	CTG-CAT	C-CT-CA	CT-GCT-GC	CGCT-A	GC-TGA	A-ATAAAA	TGCT-GA	CGA-TGC	CCT-TA	TG-CA-GT	GGT-GGT-GGT	ACC-CT	TC-ACC-G	GGTC-G	CAT-CCG	CTG-TGT	C-CCG-GCC	CGC-TCC	GTG-TG	TCGG-GT	GT-CCG	A-A-GT-A	ATG-TGG	AG-GA-AG	CTC-CAG	AT-CAA-AC-CT	GGCG-G
								CGA-CG	ACTC-CACT	AAC-GTG	TC-CGA	TC-CGT	AG-A-GA	CG-ATA	AC-GCTT	GT-GGT-GA	GA-T-T	CAG-GAG	GAT-TA	CAC-GCT	CCGC-C	ACCA-AG	CT-TGT	TCT-AC	GCG-GCT-GCT	GGT-GA	AC-CGC	CG-T-GA	T-AT-A-A	GC-GT-AGC	GCA-AGC	GT-CGG	GGA-AGA	CAT-CAT	CTG-CAGCGC	TCG-AG	AGC-TGC	C-T-GC	CCG-GA-CGC-CCG	ACG-AT	AGC-TCG	A-T-GCAA	AGC-CGG	AG-GTT	TAG-A-TC
								GTT-TG	AAG-AGA	GAC-TAC	TCT-GT	AC-AGA	GAC-TTG	T-ATTG	C-GA-G	GGTACA-C	GGA-GAA	TCGA-AT	C-GCGA	ATT-GGC	GTA-AC	CTT-CAC	TG-TTG	CAA-TA-TA	A-CG-A	TGC-AAT	A-TA-GA	T-AGT	GGT-GCG	C-GTC	G-GCCT	G-AG-AT	GTTG-CT	G-GC-TGC	TG-AC-TC	GGT-GC	TTG-CGC	C-G-G-TC	CCG-GC-TC	T-GA-T	CA-A-TG	GAC-GCT-GAC	AGC-GCG	AAC-GA-A	GAC-C
								CG-ACT-CGG	ATG-AG	GAT-TG	CT-ATCG	AG-TA-GA-T	CGC-T-C	GC-GA-TCG	T-TA-TA-A	G-AAG	T-GC-CG	GCC-GTA	T-T-CT	TCGC-G	CT-TAGA	GCGG-TC	AAC-CCA	CT-TCG	GT-AG-A	A-A-TG	AGG-TA	GCT-C-C	GCTG-GCT	GTA-C	AC-CTCA	GGGT-C	GCCT-G	TG-TG-C	G-CTT	GC-GC-CGC	GA-ACAA-TC	TGG-TC	TA-CCG	GTA-TC	AAC-CCAA	T-G-AG	ACA-CT	AC-AG-CAG	A-GCCA
								T-CT-A	TTG-TGA	TGTC-GT	ATG-GGC-TGC	AC-AAG	TG-AAC	A-CTA	TC-GAT	TCT-ATT-TA	TC-ACC-CA	GC-TTTC	AGCA-TC	GCA-GTG	CT-CT-G	CAG-C-GA	A-GT-A	CTG-TGC-T	TCGC-A	AGCCAA-CT	TTG-CG	GT-AC-AG	AT-ATC	CGC-TAC	C-GGC-G	GCT-TGA	AT-AG-A	GT-GGT	CT-TC-A	GCC-CGC-A	CTT-CG	TAG-GGC	AG-AG-AG-AG	TTC-GTC	CAG-GCTCAG	AGC-AC-A	AGC-AC	CTT-GGT	GT-CGG-A
								AG-T-A	AC-CGA	TG-GAA	GCG-G	TCG-GGT	CGGATA-TA	A-TTGG	TAT-CT	T-CT-AG-T	GTA-GCT	CT-TC-TC	AGG-CA	C-TC-C-C	TG-TG-TG-TG	CTT-CCG	ATA-GT	AT-G-C	A-CG-GC	GC-A-GC	CAC-ATC	CT-CCT-CG-A	AAC-GT	TATT-GC	ACA-CAC	ACC-GTC	AGC-ACC	G-TAGGGG	TGT-GCC	GAC-CGGGGT	TCG-ACC	ACA-CCG	AT-GGT	GTC-GTG	TC-CT-CT	CAG-GGT	AGC-A-CAG	CAG-GGA	A-AGA-A-GAA
								TC-AT-CA	TC-TCG	CGC-TTC	C-C-GCC	CTT-AC	AC-GCC	GCC-GTT	GA-AT-C	TG-TG-CA	GC-CAA	T-CAGA	CT-CTT	AG-AG-A	CGT-ATT	GTC-A	TAT-T	TGGG-T	AGC-AGC-ATG	AGA-GC	CAG-CAG-CG	GGCGCT-CGAGGG	ATC-ATG-AG	GCC-CCG-CCG	CCCA-T	AC-TGG	CGA-GCC	AT-TTA	GGC-CCA	CAA-CAC	GCCA-GGC	TGG-CGG	CG-CAC	TTA-AG	T-T-GTG	CA-CA-CA-CA-CA-CA	GA-GAAT	T-CA-AAC	GTG-GCA
								CAGCGC-CAGCGA	GA-AG-TC	T-AC-AC	TTG-TTC	TGT-GTT	GA-CT-T	TAC-GAA	T-TAA	TAT-TCA	TA-AG-G	A-C-C	AGA-C	GCC-GGC	GC-CCG-AC	GAC-GAT-GAC	CT-TA-TG	C-GAT	GCT-ACGCCG	TGA-CA	T-T-CT-AC	C-GGCAAT-CAC	TGT-A	CAC-CAC-TCA	TTG-TG	CGT-AAC	TCC-GGT	A-CT-AAG	CG-GCT-C	AG-T-TG	CCG-C-C	AT-TCG-T	C-CA-CAG	AG-T-GC	TGT-TGC-TGGGCT	CT-CT-CT-CT	G-TTG-TTG	AGT-GA	CCG-CAC
								TGAG-TGAT		CT-TCG-G-T	G-GGTT	TTG-A	CCA-TC	CA-T-AAG	AT-AG-CT	TG-AC-CA	GAG-TC	TG-C-C-G	GT-GT-GT-T-TA	CAC-TCT	GCG-TGGC	AC-CCAG	AAG-A-A-A	G-GC-CAC	GCT-GCTGGG	GGT-CGCC	GGC-TAC	A-CA-CT	AGCC-A	CG-TTGCCG	GCT-C-GA	TC-CT-G	AT-AT-A	CCAC-CCTC	GA-G-CT	CCAA-TC	ACC-CGC	C-CT-AGC	CAC-TGG	ACG-TCG	GAC-CG	TGA-GAT	TGACC-C	AT-TC-AT	GCT-CG-CTG
								CG-AGG		TATT-T	CT-GT-AG	CTG-CGA	A-CAA-GA	AC-T-GTG	CCT-C	CGG-GC-C	TGA-ATA	TGC-CGA	A-A-CG	CG-GGA	AG-GCA-C	GACGAT-GAC-GAT	A-TAC	C-GCCACA	TGG-TGG-ATG-ATG-ATG	TC-TC-T	TG-A-AG	TG-GCA	AAG-GA-G	AG-ATG	CCG-TG-TG	CG-TGC	TGC-TAC-T	GTGG-GTGG	A-GAC	AG-C-TC	C-CGG-AT	C-AGC-CGC	GCG-CAA	CG-CG-T	AG-CTG-GT	CGG-AC	TA-CT-GCA	TAA-AG	ACT-AC
								GA-TG-TG		TGA-ATC	T-CAA-GA	CA-GAAA	GTCATC-TCG	CGT-C	TCA-G	AG-CCT	C-TAA	C-C-G-T-T	AG-C-A	AG-A-CT	C-T-CGA	TGG-GGAGCC	TAT-AATT	GCC-ACC	GCTG-CT	CT-AT-AG	TGC-AAG	ATG-G	AT-TTGA-TA	CGA-AT	GA-CCG	TTG-GCC	AG-G-G-AG	TCC-AG	CCTGCA-G	ATC-CCTAG	CT-CCA	TG-GA-TG-GA	CT-G-CT	GAA-GGT	TA-ACA	TGC-ACA	GA-GAA	GCT-TTC	G-CTGG
								TTA-CT		CA-TGA	TGA-GAA		ATT-TGA	AGA-AAG	TTG-ATG	A-T-AT	G-TGTACC	T-AG-T	T-A-T	AG-T-T	GA-G-GATG	TG-ACG	C-GTT	TC-TCAC	CG-GGCT	AG-TAG	CACCGT-CAG	G-A-T	AC-TC-TG	TTC-ATC	CGGGG-G	CCT-G	CCA-AG	GTGG-GTGG-GTGG-GTGG	GGC-TGC	GTA-TG	GTG-GGT	TGC-G-TGC	CGC-CGT	AT-AGT	AG-AAACC	AGC-TG	AGA-CG	A-TCT-TTG	TTGC-GA
								AC-GCG		TTG-GT	GA-GCG-T		CAA-GT	GC-TGC-GA	GGT-AAG	GC-GC-A	GGA-CT-TC	TGG-GATC	T-TC-T-T	GA-CAC	TGT-TGC	GGA-CGG	T-G-GGC	GCT-TGG	CAG-GCT	CTG-CAG	G-C-TC	A-C-G-T	CA-GT-CT	AT-AGA	TA-GCA-T	ACC-AG-AC	TCC-G	TA-GCT	GCT-C-AGC	G-GAC-T	GGC-GTC	G-G-CTG	AT-AT-AT-AT	GAC-CAT	GAC-ATC	GAC-GCT	TGCC-GT	GCG-GTT	GC-T-AG
								CCA-CGC		GCG-TTG	GAC-TGC		AG-AG-T	TA-A-TC	C-TAG	CCA-TGC	C-A-T	GCG-ATCG	GT-G-G	AC-AC-TA-TA	ACC-CAT	AG-TC-TC	TCG-TCG-TCA-TCG	ATG-GGTT	A-GC-GC	CGG-CGG-GGC	T-A-CA	C-TCGTCA	GCG-AG	AG-GTA	CGG-CGC	GCC-CTG-GGC	ACA-GCC	CGC-GGC	CTG-AGC-GCC	GCCGTT-GTT	GGC-GGT	T-GGTGCT	GGT-ACC-T	C-TGC-T	ACC-GA	CG-CGT	T-GGCA	AT-A-AC	GCG-GT
								GA-CT-TC		GTC-TGA	CCG-CACCAG		GGA-CGC	A-AG-CG	TCA-TCGTCA	AGC-CAA	AG-G-CT	GATC-C	T-TGC-GCT	TGA-TG	G-CGGTGG	ACG-TAT	ACC-CAG	TA-CCA	CG-TGC-GC	CT-CCCA	GA-CAG-CAG	ATG-TTG	CTTTAC-CAGCAC	TAG-T	A-CCG-C	CCA-CGGT	CT-GCCC	CGG-CGC-C	AGC-CGC	TTGG-GGA	GC-C-A	G-AG-T	G-CCAG	TA-A-A	ACC-AAC	GA-AGT	C-TTG	GA-AG-A	GCC-CG-T
										ATC-AAC	CA-TAG		GT-ATC	AG-TA-CT	G-GTT	TTG-GC	AG-GA-GC	G-GGGGA	ACC-AC	GAC-GAC-GAC	GGA-AGC	GA-T-TC	A-AGT	GCA-TCA	GC-TC-A	CT-TAG	GC-GA-AG	GCG-T	TCA-GAA	AG-AG-G	CGC-TGC	CGG-CTT	CAT-AAC	GA-G-TGGG	C-C-CA	AGC-CGC-TC	GT-TC-CA	G-AAAG	TC-CGC	CCG-GTT	TGC-TCA	CT-CAT	CCG-CTC	AT-GAAA	GCG-GGCT
										GAT-GTG	TG-CTA		GCCA-GCT	CCA-TC-CG	GAG-CT	CG-TG-A	TG-CA-AC	ACCGC-T	GT-TG-TG	GAA-GCA	TCG-ATC-ATC-ATC-TCA	CAT-CTG	CAA-TA	GAC-GTT-TG	GCC-TG-CG	TCA-GCG	GTA-T	G-G-GCT	CT-CT-AG	GCG-ATC	AGG-GAG-GAG	ATG-C	CCA-CGG	CCT-CAG	CCA-GC	TAGA-CT	CCG-GAA	A-ATA	GCT-CAC	ACG-CG	G-C-G-G	GCCA-CG	AG-AAC	A-TC-T	CGGGC-GA
										AGG-CAC-AC	TC-TA-AG		TG-CTT-AG	GC-CTC	G-GAATG	CA-GCA-CT	TA-TATT	AT-AGG	CCCACA-CCCACA-CCCACA	G-G-CA	CT-TC-GA	AATG-AG	GGCT-A-G	GT-GAAT	GCGG-T	CCA-GAC	TCG-TC	AC-GGT	CCA-TG-TTG	A-TAG-A	TGG-GAA	CGA-TCA	CT-A-GCC	TTTC-A	T-CAGC	CAC-TGC	GA-G-G	CT-CT-CT-CT-CT-CT	CGG-CAG	T-AGATT	TGC-CA	G-C-GA	G-GTTTG	A-AC-A	CCG-GCC-TCG
										T-TCGA	TGA-AT		TG-ATC	CG-GCTG	TC-AG-GT	CG-TC-CT	CAG-ACA	CT-GGTG	C-C-TC	TA-A-AC	GTG-CGG-T	TGT-AT	AAAT-A	CAAA-T	CT-ACC	GCC-GCC-GCC	GC-G-CT	CA-TC-AAG	A-CT-T	GA-C-A	GGT-CCA-GC	G-TAA	AGA-CAT	GGC-T-CTG	C-CAGC	TCG-TG	CCG-CGC	GGC-GGC-TC-GCG	A-ATGTTG	A-TTC-GA	TGC-TGT-TGC-TGT	ACC-CTG	ACC-TTC	GT-T-GTC	CAC-TCA
										TA-GCG	TCGA-A		AGC-ATC	CT-GTG	C-TCT	TTC-TCC	CTC-CG	CGAT-CTT	AT-A-AT	G-GAC-GA	AGCC-C	TCA-TA	GCT-CAA	TTTC-T	T-GCTG	TTC-GGC	TCC-TGG	CAGCGC-CAGCGC	CAA-AT	GT-T-CT	GTT-CCGCTG-CCG-CTG	G-G-CGG	ATG-T	ACA-GCT	AT-TGG	CCAG-C	C-C-AC-CA	CAG-TCA	A-TG-AC	TCA-CAG	T-TAG	ACA-GC	CAG-AAG	GCA-AGT	AAG-CTG
										TTC-CTG	TC-AC-GA		GA-AG-GT	CA-TCT	TC-C-GGAA	A-T-G	T-CA-A	TA-AGG	AC-TAAA	T-GA-A	T-CTA-AG	ACGA-CT	TCC-CA	ACT-C	C-CCG-T	T-TGCTGT	CAAA-AAC	TCA-TCGTCA-TCG-TCG	AT-GT-AATGG	GC-GTC	CGA-GAC-GAC-GAC	CAC-GA	CGT-G	CCA-TCG	GAC-GC	CCGA-TC	G-G-G-GC	G-AG-AG	TG-ACA	GTG-TCA	CT-A-C	TG-GA-A	CT-CGG	T-A-TA	AG-AGAC
										GAC-AAG	A-ACA		CTA-CT	TA-CCTG	CA-TC-GA	GTACCT-GTACCT	TC-GC-A	GGCT-TG	GA-G-G-AG-G	GA-TGCT	AT-AGC	GAA-TCC	AGA-AGA	TC-GTG	CG-TTC	AAC-GAC	AGA-GCT	AGA-CT	C-AAC	TTC-C	ACT-TCA	TCG-CCA	C-C-TGA	CGC-GTG	CAG-A-CGT-C	AC-GGCT	CAC-CG	GCGG-ACC	CCCAGC-C	CGT-GCG	AAC-CGT	CT-CT-A	GT-AGC-G	CG-GAC	GCT-CTG-GCT
										T-AAG-CA	GT-GTT		ACG-AG	TG-TGC-AG	TCA-CCG	CAT-CA	AT-ATT	TC-CT-CT-CT	CCG-AGC	GAG-CAG	CGT-GCCC	C-GGA	CT-CAC	TG-T-A	TCGGC-GCT	CTAGCT-GCT	TA-GA-GA	ACA-TG	TGC-AC	A-TC-A	TGC-CCG	A-GAG	C-T-C	CACC-CCG	TGC-GGT	AG-TC-GA	AGC-GCA-GC	GCC-GGT	GT-GCG	GGCT-GCC	GTC-GT	TG-AG-TG	ACCG-G	T-TA-T	A-A-AG
										ACCCTC-CT	TCGA-CA		CTT-CGTACT	T-TG-AC	CGC-CTA	GA-AG-TCC	ATG-AC	T-T-AT	TG-TG-CT-TC	ATCGTC-TCA	CTA-CAC	CGA-GATGAC	C-GC-CT	TTC-TA	GCT-GT-GCT	T-GA-GC	GTTT-T-TC	TC-ATCC	GAC-AC	CA-GGC		GTC-TGT	CGC-ATG	GCCTCT-G	A-G-AG	CT-CAA	C-CGAG	G-CGG-C	TA-CGC	TG-ATG	TGG-TCG	T-ACG	TTC-ACG	CTT-GAC	A-CCG-CGC
										ACC-CG	CAA-GCT		AT-TTC	AC-CCG-T	GA-GTGCCC	GTG-GCG	T-AT-GA-TA	CT-TCC	CAC-GC	AC-CGT	TG-CCA	CAGCGA-CAGCGA	T-TTTG	A-TA-A	GC-GAA-A	GCC-TTG	TGA-GCA	CCA-CGG-C	GTTTT-AT	ACC-G		AAT-TA	CCTCCC-TGG	AGG-GGC	AG-GTC	T-AG-TGC	GAGCCT-AGC	GC-CTG-CTG	CAG-CAG-GC	AG-CTA	CAG-CAA	AGTC-AG	GGC-TGA	CAC-TCG	A-GA-CG
										A-C-AG	TA-A-T		CT-ACA	AT-AAT	C-CA-CT		CCG-CCA	TA-C-C-G	AT-GTG	GT-GCTATT	GTGCTG-T	GAT-CGA-GAT	CGT-TCG	TTG-GTT	AT-AG-AT	T-GC-AG	AGC-TTC	AG-A-AC	AGC-CG-CG	TTA-CTG		G-GT-GCT	ACG-C	CTG-T-TGC	TTA-CT-AG	AG-ATT	CAT-ATA	GA-TCT	T-CG-T	TA-AT-AT-AT	ACG-CTC	CAT-GC	CTT-CGAT	TA-TGC	AAT-GAT
													TGGA-GT	GC-ATG	A-AC-T		AC-ATC	GGT-GTG-TGG	C-G-T	TTC-TCT	T-GAC	A-CG-CT	G-TC-T	G-TG-G	CAG-ACA-CG	GTG-GCT-CTG	A-TGGC	CTC-C-C	GGC-GGC-G	GC-CGC-GCC		CCG-ACC	CCAGC-C	C-GTA	TTC-CTT	GA-TCG	C-GCCC	TTC-TTC	T-GCTGGG		GT-GCC	AG-CAA-T	TTTA-GT	ACT-AT	GCGGCA-AGC
													CCGT-CT		G-C-T		TAAA-GA	CAT-AT	AC-ACC	T-CGG-CAG	G-GGCT	TG-C-G	GTA-AGA	CT-CT-CT-T	GC-ACA	TC-A-CCG	CGG-A-A	GC-C-C	GTT-TCA	TGA-A-A		CTG-TTG	TG-CAC	TGC-CGG	TCT-GCC	AGT-GGT	CA-CCCAGC	GC-CA-T	AC-CGCCAG		GCA-CAA	GA-GA-GA-GA	AG-AGA	TA-CTA	GCG-A-GTA
													C-A-CTG		G-G-TC		G-CG-CCG	G-GA-GA-GA	CA-C-C-C-G	AC-C-C-G	CCA-TCA	TGG-CT-T	GA-GATGTT	AAT-A-A	CG-TA-A	GA-GA-TA	T-CT-T	AC-AAC	GGT-TCG-GGC	CAG-C-C-A		GGA-C	TGC-G-GCT	TCC-CG	AGGTCT-G	CGT-CAG	GCT-C-CCA	T-AGCC	AT-CGG		TAA-AT	GCT-TG-AG	AG-TAGG-G	ACC-AAT-GAC	A-AG-TA
													ACT-CTG		T-G-T		TG-GT-CA	ACG-A-GCG	GGCA-AT	CAC-AT	GGC-ATC	CCAC-CA	TG-A-C	GTT-GCA	GTC-CG	CT-C-A	T-GCG-AT	AC-CT-CG	ATC-TTC	TGA-AC		TC-G-G	T-T-TC-A	CGA-GAG	TAT-GC	ATG-GAT-GAT-GAT	CT-CT-CT-CT-ACA	GTT-CGC	A-ACG-AT		CT-CTTT	CAA-CTG	TAA-G	TGA-GA	CTTTG-AG
													TAAG-AG		A-GA-C		AG-TGC-TG	TC-CCT	TTA-CGG	A-TTAAA	CCA-AG-C	ATCC-T	C-GA-ACC	ACA-TGT	CT-TGC-CG	GC-GC-GC	CTG-CTG-A	TCG-TCT	CTGC-GCAG	TCG-TCA-TCG-TCA		GC-ACCC	C-TGG-GCC	G-C-CAG-G	AAGA-A	TCC-TC	TCG-G-CCA	GGT-GCA	GCG-AAC		CGT-A-GT	CGA-CAC	CT-A-TGC	ATT-CTG	GCC-GCA
													C-TC-C-TC		CTC-CAC		A-CT-AG-A	CGG-CAA		TGC-TGG	CAA-AG	GGT-AGCC	CCT-TG	TG-CCCA	CTC-A	TC-AG-T	CA-AC-GT	GCGCG-G	CT-T-T	CA-GTA		CCA-GCCCAG	G-GGA-CGG	CATC-A	AG-AG-C	CCA-ATG	CT-GGC-GGC	GCAG-GC	TC-CA-TC-CA		TGC-TGT	GAA-G	ATCG-CAG	AGA-AG	GC-T-TGA
													C-C-CGC		TCC-CTG		GTT-GT	ATT-ACA		GCC-ATA	GC-CCG-GGC	ATC-CAT	TGG-GTT	CACC-CG	GCG-TGA	GTCATC-GTC	CAC-AG	TG-G-TGC	CTA-GA	GTC-GGT		GAT-TGA	GCCA-GC	GGTG-G	ACA-C	CG-CCA	GGC-CT-TTG	ATC-TA	GC-CG-C		CTT-GTCT	CG-C-ACC	ATCT-T	CG-CCTG	T-CT-AG
													AC-T-CGG		TC-T-A			CAA-CGG		A-AAACCC-AAACCA	GT-GAA	TC-GA-GA-AG	GA-TGG	T-TG-T	GCT-GT-GCA	GCCACC-GGC	GAG-GC	AT-GAT	GAG-CTG	CTC-TG		CGC-CGC-TG	CGC-CGA	TC-GGGT	GT-GT-GT-TG-GT	T-ATCT	CGA-GAC	C-C-G-T	GGT-CCGC		ACC-GTT	TCG-CAG	ATT-C	GTT-TA	GA-AAC
													TGC-TCT		GGT-CCA			TCT-TG		CGG-G-G	CGG-GT		GCGCGG-CG	CAAA-A	T-TG-GTG	T-GTGC	AAC-CT	TGA-TG-C	CAA-AGG	GTT-GAT		CT-G-G-GCG	A-T-CA	GGT-GCT	GCG-ACG	ATA-CT	CGT-GGC-C	AG-CGT	GTG-GGC		GGC-TCA		AAC-TC	GA-TTA	CT-G-TG
													AG-TC-AG		CTG-GGT			AGG-A		TAG-CCA	CTC-CTC		A-AAG-A	CTC-CT	CT-TGC-AT		TGC-TCG	G-TGGCGG	TC-TTTCT	CA-GGT		C-GGT-CCG	C-CT-CGG	A-G-G-G-AG	CCT-CG	CTGGG-T	C-GA-TA	CA-T-G	GC-A-G		GCCA-CTG		CGAT-T	TCC-AT	T-CT-GT
													A-A-CA		TTG-GGC			T-AGGTGC		AAAAAG-A	AG-GTG		CA-CA-CT	A-TC-G	GC-GC-T		G-T-TGA	CAA-TTG	AG-AGG	GT-CACT		GT-GAC	CA-TGT	TGG-CCG	TCG-TCG-GTC	ACC-GCC-CCG	GGCCCA-GCC	GCG-GCG	A-TG-GC		GCT-GTT		GTT-GTC-TCG-TCA	CA-GCT	CT-AG-A
													AG-TAGT		TGG-CTG			C-CTTTTT		A-A-G	GA-GAG		AAT-TC	TTC-CAG	G-GA-AG		T-GC-CCA	TCT-C	A-TA-T	TCT-TGA		CGC-GGT	CCG-TGC	CGT-GTC	CGGG-A	TC-TG-GC	CCG-AC	CTG-T-CTG	GCCGGT-G		CT-CTC		TCT-A-AAG	A-AG-GA	CCCA-AG
													T-GCC-T		GC-CAT			GGGAGT-G		T-CT-C	ACG-T		TTA-GACA	GTC-TC	CT-TC-GC		CTG-CTT	TA-TCT	T-TCTT	G-GAT-GCG		CTC-GGC	TCA-GGC	C-CCAACC	AAT-C	CGT-TC	G-CCG-A	GGC-CGA	TGA-CTG		CA-GCG			TGT-TCA	TTA-G
													GC-CCGG		CTG-TCTGGC			CAAT-TCT		GCG-GTG	CAC-GGT		GTT-AAC	CT-G-T	C-CAA		TA-GAAT	TCT-AT	TGG-G-CG	TC-ACA		TGC-AGT	GC-GA-G	GCT-GGT	CCA-GA	GCC-CCACCG	CAG-AAC	TCC-TTG	A-CCAGAA		ATC-CG			CA-T-T-A-CA	GCT-TGC-CTG
													CCT-CT		T-T-CTT			AG-AG-TG		TCA-CTG	AAG-TCC		C-A-C	CGT-GGC	CG-AAC		T-AGC-CAG	ACC-GC	A-AG-CT	CTGCC-T		CGC-ACC	AGG-GA	TGG-TGT	GGC-GGC-TGCC	GC-ACT	GGGT-G	TGT-CGC	CA-CCGA					ATA-T	G-TGTC
															CGT-GC			GA-AAT			GTC-TCG		CTT-G	AGT-A	GC-GC-CG		C-ACG	CAT-CCCATT	AG-TTA	TCAC-GA		GCC-CTT	GCC-CCT	AGC-GAT	CGGTG-T	A-G-GA-GA	CGG-CCG		GA-TTG-C					AG-TGAA	A-AG-C
																					TC-TCC		GAT-GC	CGG-GAT-GAC-GAT-GAC	TC-GCAGC		T-TAGT	TCA-CCA	GA-T-AT	ACA-TC		T-AGA	C-CGT	CTT-CA	CCG-GGC	GC-C-G	CAC-GGC		GGCT-A					CAA-CCA	CAG-C-A
																					TCA-GTC		AAT-CG	GTC-AAG	AC-GTG-A		GA-GCA-A-GA	CCG-CGA	GAC-CA	AG-TC-TG		C-ACCC	GCC-CCG-CAG	CCAC-CACC	TG-GGT	TGC-G-G	GGGC-G		GCC-ATG					TA-CAA	A-ATCT
																					CCG-CCG-CCG-CCG		GGC-GCC	A-C-TG	GTA-TCT		CG-GA-T	AT-CAA	CAC-TGT	TCAGCA-GCA		CT-C-G	GCGGC-TC	GT-C-GGC	C-A-G-G	GCC-AG-CT	G-GTGA		GCA-C-CAG					GA-TCC	CG-CG-GA
																							GCCA-CA	A-T-C	CAG-CTT		GGC-AAT	AT-TA-TA	CA-ATC	TCA-ACG		ATC-CCA	G-CGG-GGC	GAA-GC	GTG-CCG	GCCC-G	CT-CGT		ACC-CCG					CT-GA-GA	AG-AG-CT-T
																							AT-T-G	CT-TGA	AAG-GCA		TG-AGA-AG	CTA-G	C-CAT	GGC-GGC-GGT		CT-GCT-CG	C-GTG	ATC-AGC	CGG-GA-GA	TGCACC-G	T-GT-A		CG-GT-T					GA-GTC	TTCAG-A
																							GTT-TC	AGC-TGA	CTG-GC-GC		CTA-TC	GAAA-AAG	AG-A-AG	C-GC-A		GGT-G-G	CA-T-CT	TCG-AGT	GCC-GCCGTT	TGG-CA	GGC-TGG		G-AG-G					AT-CTT	ATG-CGC
																							A-AT-GAT	TGG-GGA	CTGA-TG		TG-CTGT	G-GACTCA	A-TAT	T-GCA-TC		G-C-CA		C-GA-CTG	TAC-C	CCG-CG	G-ACCC							GT-AAG
																							ATT-GT	ACC-CAC	C-TCC-C		GAT-AT	G-AGA	TTG-CA	CTG-CCACC				GCC-CAG-CGC	G-ACC-GCA	ATC-C	GAC-GGC-GCG-ACG							T-AAAT
																							A-CT-A	CACC-GT	AT-A-A			CA-CTC	AT-CTA	CGC-AGC				GGC-GCT-GCA	CGG-GGT	A-A-A-A	G-ACT							CGC-CTG-CGC
																							AG-GGT	TC-TC-AC	GAC-T-T			TCA-T-T	A-A-ACA	CA-C-CCA				AG-AG-AG-AG-AG-AG	GA-GTGG		ACG-CCA							AG-CCAT
																							TCG-GTC-AG	TC-CT-CT-CT-CT	TC-GCC-CT			TCT-TCA	A-TA-T-TCA	ATG-TA				C-GC-GAG	CG-GTC		CCA-CG							GTTT-A
																							TCG-TCA	AG-GC-TGC	ATTC-GCC			TGC-TGA	T-TA-GA	C-C-G-CT				AGC-GCT			GGTG-TC							A-TC-TC
																							GA-CAGC	AC-GCT				CTA-GAA	GGT-T-TC	T-ACCC				CTC-GA			C-CCCG							CG-GA-TC
																							T-T-TG	GGCGGT-CAA-CCGCGA				AC-TTC	CT-A-TCT	CAG-TGT				TGG-GA			AT-TA-GT-AT							TTG-AT
																							GA-A-CT	CT-TC-T				TCA-TG		CGACAG-CAGCGA				G-G-T										GCT-AT
																							AT-CGC	CCAG-A				AG-GGCT						AGC-CG-G										GTTC-CT
																							AC-AGC	GTT-G-C-C				TG-AAT						GCC-CAG										ATT-CT
																							GTG-AT	GAA-GCC				TCT-GTC						T-GCG-CG										GA-GAT-G
																								AG-G-T				ACG-GCG						GCG-GGT										GA-GA-C
																								TGG-GCTG				TGC-GT						GAG-G										CTT-A-GA
																								T-TC-CT				ACG-TC						CCAC-C										AG-CT-CGA
																								TGT-C				TGC-GT-GCT						GCC-GTG										CT-A-TC-A
																								CTGCCG-GTC				GTG-CT-GCG						GGCT-G										TCC-GTA
																								TAA-GTT				AG-GAGT						AGC-GC-CAG										AAG-CG
																								ACA-A				TCA-TCG						GCA-GAG										TG-TGT
																								GC-TC-T				C-GCTG						TGG-TG										CCA-ACC
																								ACA-GCA				TCGTCA-TCG-TCG-TCG-TCG						CGC-CCG-GCC										T-TG-A
																								TC-T-AG				ACC-TC						CGGT-G										TAC-AGA
																								GA-A-A				CGA-TTC						CGA-CTG										TG-TAA
																												AGA-CGT						CCG-GCG										GTG-ATG
																												CCG-TG						G-T-GC										ATA-TA
																												GT-GT-TG						ATAG-T										T-GT-TA-AT
																												TGTT-AG-CG-TC						A-GC-CG										GA-T-AG
																												C-C-A-G																TCT-TTC
																												GGA-AG																TC-A-CA
																												CTG-GTC																T-ACT
																												A-TC-CT																A-GA-T
																												T-CCAT
																												AT-GGC
																												C-C-C-TC
