# Supplementary figures and images for: Genome-Wide Investigation and Analysis of Microsatellites and Compound Microsatellites in Leptolyngbya-like Species, Cyanobacteria
Source: MDPI journal article supplement (doi:10.3390/life11111258), 2021-11-18

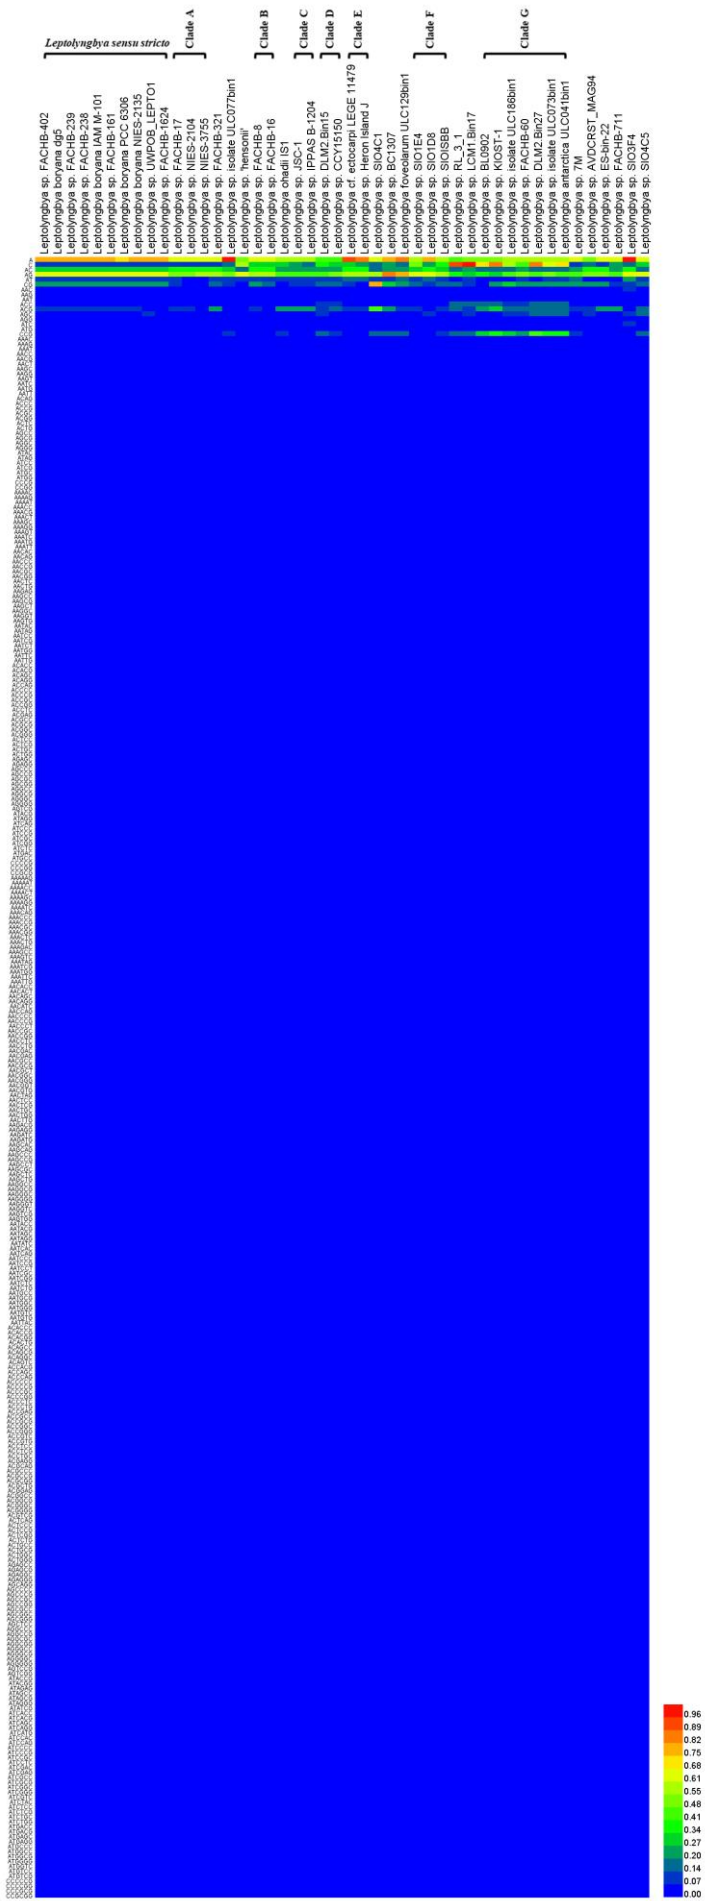

**Figure S1.** Relative abundance of standard motifs identified in *Leptolyngbya* genomes.

Supplement: s1 [file s1]
